# Supplementary material
Source: publisher figshare collection journal article supplement (https://acs.figshare.com/ndownloader/files/4574851)

# Supporting Information

## Diastereo- and Enantioselective Synthesis of $\beta$ -Hydroxy- $\alpha$ -Amino Acids: Application to the synthesis of a key intermediate for Lactacystin

Qiong Li, Shao-Bo Yang, Zhihui Zhang, Lei Li and Peng-Fei Xu\*

State Key Laboratory of Applied Organic Chemistry, College of Chemistry and Chemical  
Engineering, Lanzhou University, Lanzhou 730000, PRC.

[xupf@lzu.edu.cn](mailto:xupf@lzu.edu.cn)

### Contents:

|                                                                                           |         |
|-------------------------------------------------------------------------------------------|---------|
| General methods.....                                                                      | S2      |
| General methods for the synthesis of racemic $\beta$ -hydroxy- $\alpha$ -amino acids..... | S3-S4   |
| X-ray Structures of compound <b>2c'</b> and <b>3c'</b> .....                              | S5      |
| Spectral data of typical compounds.....                                                   | S6-S15  |
| $^1\text{H}$ NMR and $^{13}\text{C}$ NMR spectra of typical compounds .....               | S16-S82 |
| HPLC spectra of the compounds .....                                                       | S83-S91 |

**General Methods.** All aldol reactions were conducted in flame-dried modified long-neck flasks fitted with rubber septa under an argon atmosphere. Solvents and reagents were dried prior to use as required. Diisopropylamine were distilled from calcium hydride immediately prior to use, THF was distilled from sodium benzophenone. *n*-butyllithium in hexane (nominally 2.8 M) was purchased from Alfa and titrated before each use. Thin-layer chromatography plates visualized by exposure to ultraviolet light and/or immersion in a staining solution (phosphomolybdic acid) followed by heating on a hot plate. Flash chromatography was carried out utilizing silica gel 200-300 mesh. <sup>1</sup>H NMR spectra were recorded at 300 or 400 MHz, <sup>13</sup>C NMR spectra were recorded at 75 or 100 MHz. For <sup>1</sup>H NMR spectral, data are reported in *ppm* relative to chloroform ( $\delta$  = 7.26 ppm) or deuterium oxide ( $\delta$  = 4.80 ppm) as internal standard and <sup>13</sup>C NMR data are repoted in *ppm* relative to chloroform ( $\delta$  = 77.0 ppm) as internal standard. High-resolution mass spectral analysis (HRMS) data were measures on the Bruker Spexll by means of the ESI technique. Optical rotation was recorded at 20 °C by the DekinElmer Model 341 Polarimeter. For chiral aldol adducts, diastereomeric ratios were determined by the integration of the <sup>1</sup>H NMR spectra (400 MHz). The ee value of the  $\beta$ -hydroxy- $\alpha$ -amino acids obtained from hydrolysis of the aldol adducts was determined by measuring the optical rotation or by HPLC analysis on a CR(+) column.

For detecting if aldol products have been epimerized in the course of hydrolysis, the racemic  $\beta$ -hydroxy- $\alpha$ -amino acids **IV** were prepared as shown in Scheme 1 and 2. Using bromobenzene as the starting material, the Grignard reagent phenyl magnesium bromide **II** was gotten and reacted with benzonitrile to yield Grignard-nitrile complex **III**. Compound **III** was decomposed by cautious addition of anhydrous methanol to give diphenyl ketimine **IV**. Diphenyl ketimine **IV** reacted with the amino ester salt **V**, the imine **VI** could be accessed (Scheme 1).

Treatment of the imine **VI** with LDA and 2-halogenobenzaldehyde **VII** in THF at 0 °C delivered the desired aldol analogues **VIII**. The products of aldol reaction were hydrolyzed with 6 *N* HCl at 90 °C for three hours to afforded racemic  $\beta$ -hydroxy- $\alpha$ -amino acids (Scheme 2).

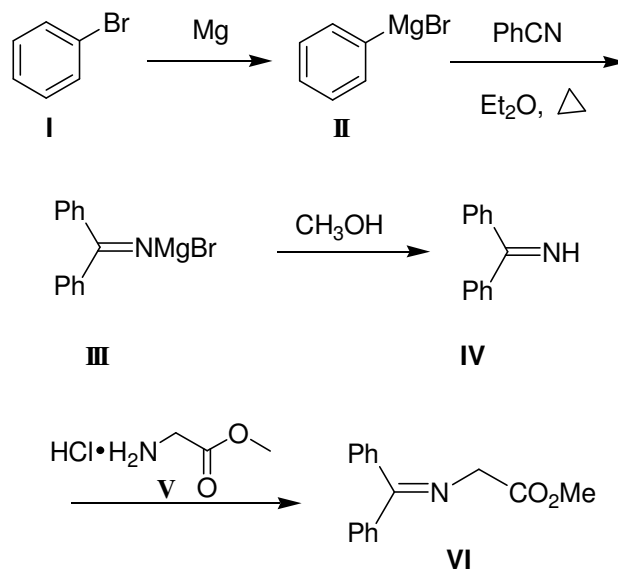

**Scheme 1** Preparation of the achiral glycine equivalent

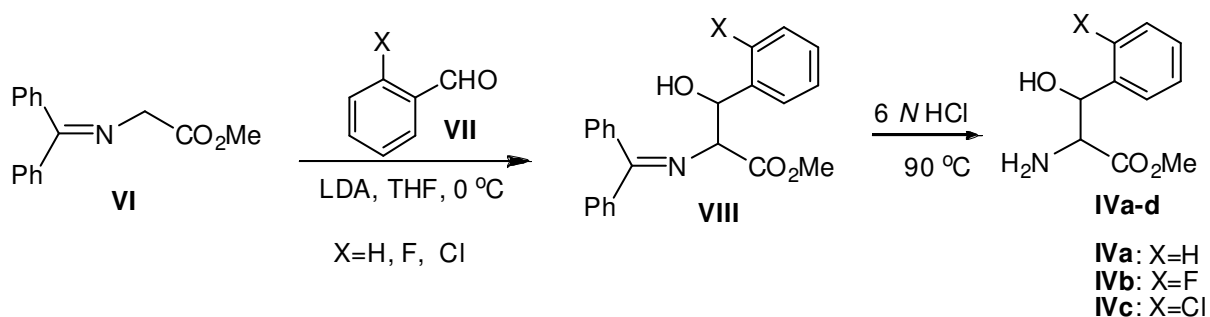

**Scheme 2** Preparation of racemic  $\beta$ -hydroxy- $\alpha$ -amino acids.

With these racemic  $\beta$ -hydroxy- $\alpha$ -amino acids and our pure compounds in hand, HPLC was performed on WATERS HPLC systems consisting of the following: pump, PU-980; detector, UVDEC-100-IV, measured at 254 nm; column, CR (+); mobile phase, aq.  $\text{HClO}_4$  (PH = 1.5); flow rate, 0.8 mL/min. In contrast to the spectrogram of the racemic and pure compounds, the result displayed that the enantiomer can not be separated with this column but the diastereomer can be separated nicely. Even so, if the  $\alpha$ -position of the carbonyl was racemized in the condition of hydrolyses, two diastereomer should be afforded. However, HPLC analyses results of the  $\beta$ -hydroxy- $\alpha$ -amino acids indicated another diastereomer was not been found. We can get the conclusion that there is not racemization in the course of hydrolysis of the aldol products.

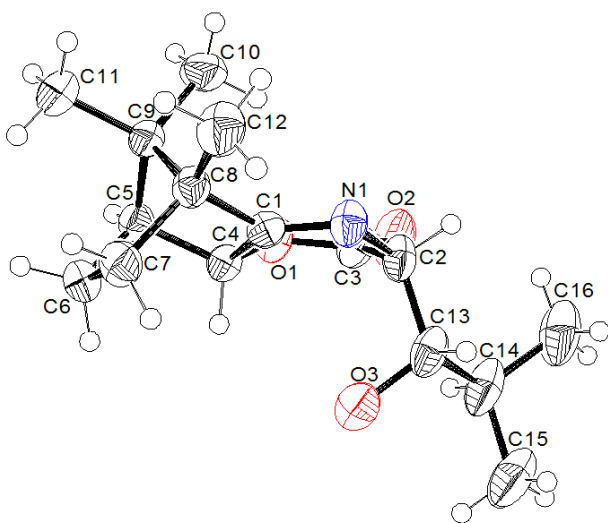

FIGURE 1. X-ray structures of Compound **2c'**

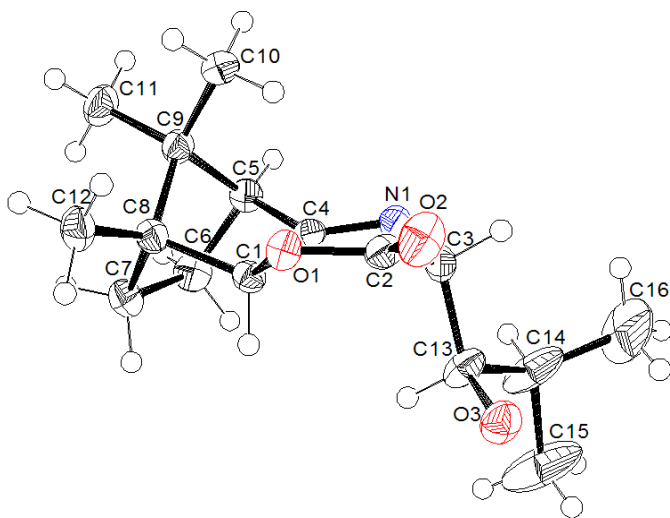

FIGURE 2. X-ray structures of Compound **3c'**

## Spectral data of typical compounds

**(1*S*,2*R*,5*S*,8*R*,1'*S*)-5-(1'-Hydroxybutyl)-8,11,11-trimethyl-3-oxa-6-azatricyclo[6.2.1.0<sup>2,7</sup>]undec-6-en-4-one (2b')**: White solid (334 mg, 80 %),  $[\alpha]_D^{20} +37$  (*c* 1.15, CHCl<sub>3</sub>); m.p. 99–101°C; IR (KBr): 3438 (s), 2959 (m), 1740 (s), 1691(s) cm<sup>-1</sup>; <sup>1</sup>H NMR (400 MHz, CDCl<sub>3</sub>): δ 4.82 (s, 1H), 4.46 (d, *J* = 4 Hz, 1H), 3.97 (m, 1H), 2.18 (d, *J* = 4.4 Hz, 1H), 2.09–2.00 (m, 1H), 1.79–1.35 (m, 7H), 1.07 (s, 3H), 0.96 (s, 3H), 0.96 (t, *J* = 7.2 Hz, 3H), 0.80 (s, 3H); <sup>13</sup>C NMR (100 MHz, CDCl<sub>3</sub>): δ 182.7, 169.9, 80.2, 73.4, 67.0, 52.9, 48.3, 47.8, 37.5, 29.3, 25.9, 20.1, 19.5, 19.0, 13.7, 10.1; HRMS (ESI): calcd for C<sub>16</sub>H<sub>26</sub>NO<sub>3</sub>[M+H]<sup>+</sup>: 280.1907, found 280.1907.

**(1*S*,2*R*,5*S*,8*R*,1'*S*)-5-(1'-Hydroxyisobutyl)-8,11,11-trimethyl-3-oxa-6-azatricyclo[6.2.1.0<sup>2,7</sup>]undec-6-en-4-one (2c')**: White solid (351 mg, 84 %),  $[\alpha]_D^{20} +38$  (*c* 1.17, CHCl<sub>3</sub>); m.p. 102–104 °C; IR (KBr): 3422(s), 2962 (m), 1717 (S), 1693 (s) cm<sup>-1</sup>; <sup>1</sup>H NMR (400 MHz, CDCl<sub>3</sub>): δ 4.80 (s, 1H), 4.67 (d, *J* = 4.4 Hz, 1H), 3.59 (m, 1H), 2.19 (d, *J* = 4.8 Hz, 1H), 2.11 (d, *J* = 5.2 Hz, 1H), 2.07–2.00 (m, 2H), 1.80–1.73 (m, 1H), 1.64–1.59 (m, 1H), 1.41–1.35 (m, 1H), 1.09 (d, *J* = 6.8 Hz, 3H), 1.07 (s, 3H), 1.03 (d, *J* = 6.8 Hz, 3H), 0.96 (s, 3H), 0.81 (s, 3H); <sup>13</sup>C NMR (100 MHz, CDCl<sub>3</sub>): δ 182.6, 170.1, 80.1, 79.2, 64.8, 52.8, 48.3, 47.8, 31.7, 29.3, 25.9, 20.1, 19.6, 19.5, 17.9, 10.2; HRMS (ESI): calcd for C<sub>16</sub>H<sub>26</sub>NO<sub>3</sub>[M+H]<sup>+</sup>: 280.1907, found 280.1908 .

**(1*S*,2*R*,5*S*,8*R*,1'*S*)-5-(1'-Hydroxy-1'-cyclohexylmethyl)-8,11,11-trimethyl-3-oxa-6-azatricyclo [6.2.1.0<sup>2,7</sup>]undec-6-en-4-one (2d')**: White solid (392 mg, 82 %),  $[\alpha]_D^{20} +33$

(c 1.22, CHCl<sub>3</sub>); m. p. 154–156 °C; IR (KBr): 3583 (s), 2927 (s), 1726 (s), 1699 (s), 1038 (s) cm<sup>-1</sup>; <sup>1</sup>H NMR (300 MHz, CDCl<sub>3</sub>): δ 4.80 (s, 1H), 4.69 (d, *J* = 4.2 Hz, 1H), 3.62 (dd, *J* = 8.1 Hz, 3.9 Hz, 1H), 2.18 (d, *J* = 4.5 Hz, 1H), 2.08–1.71 (m, 4H), 1.70–1.56 (m, 6H), 1.41–1.11 (m, 5H), 1.08 (s, 3H), 0.93 (s, 3H), 0.75 (s, 3H); <sup>13</sup>C NMR (75 MHz, CDCl<sub>3</sub>): δ 182.9, 170.0, 80.2, 78.6, 64.2, 52.9, 48.4, 47.7, 40.9, 29.6, 29.3, 28.3, 26.2, 25.9, 25.7, 25.6, 20.1, 19.5, 10.2; HRMS (ESI): calcd for C<sub>19</sub>H<sub>30</sub>NO<sub>3</sub>[M+H]<sup>+</sup>: 320.2220, found 320.2223.

**(1*S*,2*R*,5*S*,8*R*,1'*R*)-5-(1'-Hydroxybenzyl)-8,11,11-trimethyl-3-oxa-6-azatricyclo[6.2.1.0<sup>2,7</sup>]undec-6-en-4-one (2e)**: White solid (375 mg, 80 %), [*α*]<sub>D</sub><sup>20</sup> -3 (c 1.27, CHCl<sub>3</sub>); m.p. 141–143 °C; IR (KBr): 3467 (s), 2960 (s), 1747 (s), 1624 (s) cm<sup>-1</sup>; <sup>1</sup>H NMR (400 MHz, CDCl<sub>3</sub>): δ 7.36–7.27 (m, 5H), 5.23 (t, *J* = 4.8 Hz, 1H), 4.85 (d, *J* = 4.0 Hz, 1H), 3.39 (s, 1H), 3.19 (d, *J* = 5.6 Hz, 1H), 2.00 (d, *J* = 4.8 Hz, 1H), 1.94–1.86 (m, 1H), 1.72–1.65 (m, 1H), 1.53–1.46 (m, 1H), 1.03 (s, 3H), 1.00–0.97 (m, 1H), 0.96 (s, 3H), 0.75 (s, 3H); <sup>13</sup>C NMR (100 MHz, CDCl<sub>3</sub>): δ 183.3, 170.8, 139.6, 128.6, 128.5, 126.6, 79.6, 74.9, 67.4, 53.0, 48.2, 47.4, 29.1, 25.9, 20.0, 19.4, 10.1; HRMS(ESI): calcd for C<sub>19</sub>H<sub>24</sub>NO<sub>3</sub>[M+H]<sup>+</sup>: 314.1751, found 314.1754.

**(1*S*,2*R*,5*S*,8*R*,1'*R*)-5-(1'-Hydroxy-*o*-chlorobenzyl)-8,11,11-trimethyl-3-oxa-6-azatricyclo [6.2.1.0<sup>2,7</sup>]undec-6-en-4-one (2g)**: White solid (380 mg, 73 %), [*α*]<sub>D</sub><sup>20</sup> -40 (c 1.19, CHCl<sub>3</sub>); m.p. 176–178 °C; IR (KBr): 3375 (br), 2960 (s), 1743 (s), 1691 (s) cm<sup>-1</sup>; <sup>1</sup>H NMR (400 MHz, CDCl<sub>3</sub>): δ 7.48–7.45 (m, 1H), 7.34–7.24 (m, 3H), 5.75 (t, *J* = 3.2 Hz, 1H), 4.83 (d, *J* = 4.0 Hz, 1H), 4.53 (s, 1H), 3.15 (d, *J* = 2.8 Hz, 1H), 2.15 (d, *J* = 4.4 Hz, 1H), 2.04–2.02 (m, 1H), 1.75–1.72 (m, 1H), 1.68–1.64 (m, 1H), 1.34–1.23 (m, 1H), 0.97 (s, 3H), 0.93 (s, 3H), 0.74 (s, 3H); <sup>13</sup>C NMR (100 MHz, CDCl<sub>3</sub>): δ 183.6, 170.6, 137.3,

132.0, 129.4, 129.3, 128.4, 126.9, 80.0, 72.0, 65.9, 53.0, 48.1, 47.7, 29.3, 26.0, 20.0, 19.4, 10.0; HRMS(ESI): calcd for C<sub>19</sub>H<sub>23</sub>ClNO<sub>3</sub>[M+H]<sup>+</sup> 348.1361, found 348.1371.

**(1*S*,2*R*,5*S*,8*R*,1'*R*)-5-(1'-Hydroxy-*o*-methoxybenzyl)-8,11,11-trimethyl-3-oxa-6-azatri-cyclo [6.2.1.0<sup>2,7</sup>]undec-6-en-4-one (2h):** White solid (400 mg, 78 %),  $[\alpha]_D^{20} -2$  (c 1.15, CHCl<sub>3</sub>); m. p. 138–140°C; IR (KBr): 3632 (s), 2960 (s), 1746 (s), 1693 (s), 1240 (s) cm<sup>-1</sup>; <sup>1</sup>H NMR (400 MHz, CDCl<sub>3</sub>): δ 7.33–7.26 (m, 2H), 6.98–6.96 (m, 1H), 6.86 (d, *J* = 5.2 Hz, 1H), 5.42 (d, *J* = 5.6 Hz, 1H), 4.83 (d, *J* = 5.2 Hz, 1H), 4.29 (s, 1H), 3.81 (s, 3H), 2.11 (d, *J* = 4.4 Hz, 1H), 2.02–1.96 (m, 1H), 1.74–1.68 (m, 1H), 1.56–1.50 (m, 1H), 1.28–1.17 (m, 1H), 1.00 (s, 3H), 0.92 (s, 3H), 0.75(s, 3H); <sup>13</sup>C NMR (100 MHz, CDCl<sub>3</sub>): δ 183.1, 170.2, 156.4, 129.3, 127.9, 127.4, 120.7, 110.5, 79.5, 72.3, 67.5, 55.1, 52.9, 48.1, 47.6, 29.4, 26.0, 20.0, 19.4, 10.1; HRMS (ESI) calcd for C<sub>20</sub>H<sub>26</sub>NO<sub>4</sub>[M+H]<sup>+</sup>: 344.1856, found 344.1861.

**(1*R*,2*S*,5*R*,8*S*,1'*S*)-5-(1'-Hydroxyethyl)-1,11,11-trimethyl-3-oxa-6-azatricyclo[6.2.1.0<sup>2,7</sup>]undec-6-en-4-one (3a, minor):** <sup>1</sup>H NMR (400 MHz, CDCl<sub>3</sub>): δ 4.59 (s, 1H), 4.40 (d, *J* = 4.8 Hz, 1H), 4.16 (m, 1H), 2.43 (d, *J* = 4.4 Hz, 1H), 2.05–2.00 (m, 1H), 1.92–1.85 (m, 1H), 1.63–1.57 (m, 1H), 1.47 (d, *J* = 2.4 Hz, 3H), 1.46–1.37 (m, 1H), 1.05 (s, 3H), 0.97 (s, 3H), 0.85 (s, 3H); <sup>13</sup>C NMR (100 MHz, CDCl<sub>3</sub>): δ 181.0, 169.5, 82.0, 69.3, 68.0, 53.9, 49.5, 48.2, 34.5, 21.8, 21.5, 20.0, 19.3, 9.7.

**(1*R*,2*S*,5*R*,8*S*,1'*R*)-5-(1'-Hydroxybutyl)-1,11,11-trimethyl-3-oxa-6-azatricyclo[6.2.1.0<sup>2,7</sup>]undec-6-en-4-one (3b'):** Colorless oil (334 mg, 80 %),  $[\alpha]_D^{20} -3$  (c 1.61, CH<sub>2</sub>Cl<sub>2</sub>); <sup>1</sup>H NMR (400 MHz, CDCl<sub>3</sub>): δ 4.60 (s, 1H), 4.43 (d, *J* = 4.0 Hz, 1H), 3.96 (s, 1H), 2.41 (d, *J* = 4.4 Hz, 1H), 2.05–1.36 (m, 8H), 1.05 (s, 3H), 1.00–0.95 (m, 6H), 0.85 (s, 3H); <sup>13</sup>C NMR (100 MHz, CDCl<sub>3</sub>): δ 181.1, 169.6, 82.1, 73.3, 66.9, 53.9, 49.5, 48.2, 37.4, 34.5,



21.5, 19.9, 19.2, 19.0, 13.8, 9.7; HRMS (ESI): calcd for C<sub>16</sub>H<sub>26</sub>NO<sub>3</sub>[M+H]<sup>+</sup> 280.1907, found 280.1902.

**(1*R*,2*S*,5*R*,8*S*,1'*R*)-5-(1'-Hydroxy-*iso*-butyl)-1,11,11-trimethyl-3-oxa-6-azatricyclo[6.2.1.0<sup>2,7</sup>] undec-6-en-4-one (3c')**: White solid (359 mg, 86 %), [ $\alpha$ ]<sub>D</sub><sup>20</sup> -40 (*c* 1.38, CH<sub>2</sub>Cl<sub>2</sub>); m.p. 178 °C (dec), IR (KBr): 3407 (s), 3471 (s), 2966 (m), 1746 (s), 1695(s) cm<sup>-1</sup>; <sup>1</sup>H NMR (400 MHz, CDCl<sub>3</sub>):  $\delta$  4.59 (d, *J* = 3.2 Hz, 1H), 3.55 (s, 1H), 2.55 (s, 1H), 2.41 (d, *J* = 4.4 Hz, 1H), 2.05–1.96 (m, 2H), 1.91–1.84 (m, 1H), 1.61–1.54 (m, 1H), 1.41–1.35 (m, 1H), 1.08 (d, *J* = 6.8 Hz, 3H), 1.02 (d, *J* = 6.8 Hz, 3H), 1.00 (s, 3H), 0.86 (s, 3H); <sup>13</sup>C NMR (100 MHz, CDCl<sub>3</sub>):  $\delta$  181.0, 169.8, 81.8, 78.7, 64.7, 53.9, 49.5, 48.2, 34.4, 31.5, 21.4, 19.9, 19.5, 19.2, 17.6, 9.7; HRMS (ESI): calcd for C<sub>16</sub>H<sub>26</sub>NO<sub>3</sub>[M+H]<sup>+</sup> 280.1907, found 280.1900.

**(1*R*,2*S*,5*R*,8*S*,1'*R*)-5-(1'-Hydroxy-*n*-heptyl)-1,11,11-trimethyl-3-oxa-6-azatricyclo[6.2.1.0<sup>2,7</sup>] undec-6-en-4-one (3d')**: Colorless oil (399 mg, 83 %), [ $\alpha$ ]<sub>D</sub><sup>20</sup> -8 (*c* 1.02, CH<sub>2</sub>Cl<sub>2</sub>); IR (KBr): 3260 (s), 2956 (s), 2928 (s), 1743 (s), 1701 (s) cm<sup>-1</sup>; <sup>1</sup>H NMR (400 MHz, CDCl<sub>3</sub>):  $\delta$  4.62 (s, 1H), 4.43 (s, 1H), 3.94–3.90 (m, 1H), 2.42 (d, *J* = 4.4 Hz, 1H), 2.04–1.58 (m, 6H), 1.56–1.29 (m, 8H), 1.05 (s, 3H), 0.96 (s, 3H), 0.90–0.85 (s, 6H); <sup>13</sup>C NMR (100 MHz, CDCl<sub>3</sub>):  $\delta$  181.2, 169.6, 82.0, 73.5, 66.9, 53.9, 49.5, 48.2, 35.2, 34.5, 31.7, 28.9, 25.7, 22.5, 21.5, 20.0, 19.3, 14.0, 9.7; HRMS (ESI): calcd for C<sub>19</sub>H<sub>32</sub>NO<sub>3</sub>[M+H]<sup>+</sup> 322.2377, found 322.2371.

**(1*R*,2*S*,5*R*,8*S*,1'*R*)-5-(1'-Hydroxy-1'-*cyclo*-hexylmethyl)-1,11,11-trimethyl-3-oxa-6-azatricyclo [6.2.1.0<sup>2,7</sup>]undec-6-en-4-one (3e')**: Colorless oil (397 mg, 82 %); [ $\alpha$ ]<sub>D</sub><sup>20</sup> +1.5 (*c* 1.49, CH<sub>2</sub>Cl<sub>2</sub>); IR (KBr): 3414 (s), 2926 (s), 1741 (s), 1700 (s), 1075 (s) cm<sup>-1</sup>; <sup>1</sup>H NMR (300 MHz, CDCl<sub>3</sub>):  $\delta$  4.59 (d, *J* = 4.8 Hz, 2H), 3.54 (dd, *J* = 7.5 Hz, 4.5 Hz, 1H), 2.38 (d,

$J = 4.8$  Hz, 1H), 2.01–1.82 (m, 4H), 1.78–1.55 (m, 6H), 1.36–1.04 (m, 5H), 1.01 (s, 3H), 0.93 (s, 3H), 0.81 (s, 3H);  $^{13}\text{C}$  NMR (75 MHz,  $\text{CDCl}_3$ ):  $\delta$  181.2, 169.7, 81.8, 78.0, 64.2, 53.8, 49.4, 48.2, 40.8, 34.4, 29.6, 27.9, 26.2, 25.8, 25.6, 21.4, 19.9, 19.2, 9.7; HRMS (ESI): calcd for  $\text{C}_{19}\text{H}_{30}\text{NO}_3[\text{M}+\text{H}]^+$  320.2220, found 320.2216.

**(1*R*,2*S*,5*R*,8*S*,1'*S*)-5-(1'-Hydroxy-*o*-fluorobenzyl)-1,11,11-trimethyl-3-oxa-6-azatricyclo [6.2.1.0<sup>2,7</sup>]undec-6-en-4-one (3g)**: White solid (406 mg, 82 %),  $[\alpha]_D^{20} +64$  ( $c$  1.05,  $\text{CH}_2\text{Cl}_2$ ); decomposed with blurry melt point; IR (KBr): 3179 (br), 2931 (m), 1745 (s), 1700 (s)  $\text{cm}^{-1}$ ;  $^1\text{H}$  NMR (400 MHz,  $\text{CDCl}_3$ ):  $\delta$  7.42–7.40 (m, 1H), 7.39–7.27 (m, 1H), 7.18–7.14 (m, 1H) 7.06–7.00 (m, 1H), 5.65 (t,  $J = 4.4$  Hz, 1H), 4.76 (d,  $J = 4.0$  Hz, 1H), 4.32 (s, 1H), 3.05 (d,  $J = 4.8$  Hz, 1H), 2.34 (d,  $J = 4.8$  Hz, 1H), 2.04–1.94 (m, 1H), 1.89–1.81 (m, 1H), 1.60–1.53 (m, 1H), 1.32–1.23 (m, 1H), 1.03 (s, 3H), 0.93 (s, 3H), 0.80 (s, 3H);  $^{13}\text{C}$  NMR (100 MHz,  $\text{CDCl}_3$ ):  $\delta$  182.0, 170.3, 128.0, 127.9, 127.0, 124.3, 115.3, 82.8, 69.7, 66.3, 54.0, 49.4, 48.0, 34.6, 21.4, 19.9, 19.2, 9.7; HRMS (ESI): calcd for  $\text{C}_{19}\text{H}_{23}\text{FNO}_3[\text{M}+\text{H}]^+$  332.1656, found 332.1658.

**(1*R*,2*S*,5*R*,8*S*,1'*S*)-5-(1'-Hydroxy-*o*-chlorobenzyl)-1,11,11-trimethyl-3-oxa-6-azatricyclo [6.2.1.0<sup>2,7</sup>]undec-6-en-4-one (3h)**: White solid (416 mg, 80 %),  $[\alpha]_D^{20} +32$  ( $c$  1.05, DMSO); decomposed with blurry melt point; IR (KBr): 3145 (b), 2960 (s), 1744 (s), 1700 (s)  $\text{cm}^{-1}$ ;  $^1\text{H}$  NMR (400 MHz,  $\text{CDCl}_3$ ):  $\delta$  7.49–7.28 (m, 4H), 5.82 (t,  $J = 4.0$  Hz, 1H), 4.90 (d,  $J = 4.0$  Hz, 1H), 4.50 (s, 1H), 2.57 (d,  $J = 3.6$  Hz, 1H), 2.36 (d,  $J = 4.4$  Hz, 1H), 2.17–1.96 (m, 1H), 1.91–1.84 (m, 1H), 1.66–1.59 (m, 1H), 1.40–1.24 (m, 1H), 1.05 (s, 3H), 0.94 (s, 3H), 0.80 (s, 3H);  $^{13}\text{C}$  NMR (100 MHz,  $\text{CDCl}_3$ ):  $\delta$  182.0, 170.4, 137.1, 131.7, 129.5, 128.2, 127.0, 82.0, 72.5, 65.2, 54.0, 49.4, 48.0, 34.7, 21.5, 19.9, 19.2, 9.7; HRMS (ESI): calcd for  $\text{C}_{19}\text{H}_{23}\text{ClNO}_3[\text{M}+\text{H}]^+$  348.1361, found 348.1361.

**(2S, 3S)-3-Hydroxyleucine (4c):** White solid (153 mg, 87 %),  $[\alpha]_D^{20} +20$  (*c* 1.1, H<sub>2</sub>O), lit<sup>12g</sup>  $[\alpha]_D^{20} +22$  (*c* 1, H<sub>2</sub>O); m.p. 224–226 °C; <sup>1</sup>H NMR (400 MHz, D<sub>2</sub>O): δ 3.91 (s, 1H), 3.52 (dd, *J* = 9.2 Hz, 6 Hz, 1H), 1.94 (m, 1H), 0.97 (m, 6H). <sup>13</sup>C NMR (100 MHz, D<sub>2</sub>O): δ 171.8, 76.1, 57.1, 30.3, 18.6, 18.5.

**(2S, 3S)-2-Amino-3-cyclo-hexyl-3-hydroxypropanoic acid (4d):** White solid (166 mg, 74 %),  $[\alpha]_D^{20} +33$  (*c* 1.1, 2*N* HCl); m.p. 208–210 °C; <sup>1</sup>H NMR (400 MHz, D<sub>2</sub>O): δ 3.92 (d, *J* = 3.2 Hz, 1H), 3.61 (dd, *J* = 9.2 Hz, 6 Hz, 1H), 1.94–0.89 (m, 11H).

**(2S, 3R)-2-Amino-3-hydroxy-3-phenylpropanoic acid (4e):** White solid (141 mg, 65 %),  $[\alpha]_D^{20} -30$  (*c* 1.0, H<sub>2</sub>O), lit<sup>12d</sup>  $[\alpha]_D^{20} -32.8$  (*c* 0.1, H<sub>2</sub>O); m.p. 184–186 °C; <sup>1</sup>H NMR (400 MHz, D<sub>2</sub>O): δ 7.43 (m, 5H), 5.3 (s, 1H), 3.91 (dd, *J* = 8 Hz, 4 Hz, 1H). <sup>13</sup>C NMR (100 MHz, D<sub>2</sub>O): δ 172.1, 139.1, 128.9, 128.5, 125.8, 71.3, 60.8.

**(2S, 3R)-2-Amino-3-hydroxy-3-(*o*-fluorophenyl)propanoic acid (4f):** White solid (167 mg, 70 %),  $[\alpha]_D^{20} -20$  (*c* 1.0, H<sub>2</sub>O), lit<sup>12h</sup>  $[\alpha]_D^{20} -18.5$  (*c* 0.8, H<sub>2</sub>O); m.p. 204–206 °C; <sup>1</sup>H NMR (400 MHz, D<sub>2</sub>O): δ 7.59–7.56 (m, 1H), 7.45–7.42 (m, 1H), 7.32–7.26 (m, 1H), 7.22–7.15 (m, 1H), 5.52 (dd, *J* = 7.2 Hz, 4.8 Hz, 1H), 4.0 (d, *J* = 4.8 Hz, 1H). <sup>13</sup>C NMR (100 MHz, D<sub>2</sub>O): δ 171.7, 130.6, 130.5, 127.7, 124.8, 115.8, 115.5, 66.4, 59.4.

**(2S, 3R)-2-Amino-3-hydroxy-3-(*o*-chlorophenyl)propanoic acid (4g):** White solid (196 mg, 76 %),  $[\alpha]_D^{20} -34$  (*c* 1.0, H<sub>2</sub>O); m.p. 206–208 °C; <sup>1</sup>H NMR (400 MHz, D<sub>2</sub>O): δ 7.65 (d, *J* = 7.6 Hz, 1H), 7.51–7.36 (m, 3H), 5.68 (d, *J* = 3.2 Hz, 1H), 4.1 (t, *J* = 1.6 Hz, 1H). <sup>13</sup>C NMR (100 MHz, D<sub>2</sub>O): δ 171.9, 136.3, 131.5, 129.9, 129.8, 127.5, 127.4, 68.2, 58.1.

**(2R, 3R)-2-Amino-3-hydroxynonanoic acid (5d):** White solid (191 mg, 81 %),  $[\alpha]_D^{20}$   $-6.7$  ( $c$  1.0, 6*N* HCl); m.p. 207 °C (dec);  $^1\text{H}$  NMR (400 MHz, D<sub>2</sub>O):  $\delta$  4.12 (m, 1H), 3.84 (d,  $J$  = 4 Hz, 1H), 1.49–1.28 (m, 10H), 0.88–0.85 (m, 3H).  $^{13}\text{C}$  NMR (100 MHz, D<sub>2</sub>O):  $\delta$  171.9, 69.6, 59.3, 30.9, 30.7, 28.0, 25.2, 21.9, 13.3.

**(2R, 3R)-2-Amino-3-cyclo-hexyl-3-hydroxypropanoic acid (5e):** White solid (170 mg, 76 %),  $[\alpha]_D^{20}$   $-33$  ( $c$  1.0, H<sub>2</sub>O); m.p. 208–210 °C;  $^1\text{H}$  NMR (300 MHz, D<sub>2</sub>O):  $\delta$  3.74 (d,  $J$  = 3.0 Hz, 1H), 3.43 (dd,  $J$  = 9.0 Hz, 3.0 Hz, 1H), 1.76–0.74 (m, 11H). (deuterium oxide ( $\delta$  = 4.68 ppm) as internal standard)

**(2R, 3S)-2-Amino-3-hydroxy-3-phenylpropanoic acid (5f):** White solid (173 mg, 80 %),  $[\alpha]_D^{20}$   $+31$  ( $c$  1.28, H<sub>2</sub>O), lit<sup>12d</sup>  $[\alpha]_D^{20}$   $+30.6$  ( $c$  0.7, H<sub>2</sub>O); m.p. 196–197 °C;  $^1\text{H}$  NMR (400 MHz, D<sub>2</sub>O):  $\delta$  7.507–7.408 (m, 5H), 5.31 (d,  $J$  = 4.4 Hz, 1H), 3.93 (d,  $J$  = 4.4 Hz, 1H).  $^{13}\text{C}$  NMR (100 MHz, D<sub>2</sub>O):  $\delta$  172.0, 139.1, 128.9, 128.5, 125.8, 71.2, 60.8.

**(2R, 3S)-2-Amino-3-hydroxy-3-(*o*-fluorophenyl)propanoic acid (5g):** White solid (198 mg, 83 %),  $[\alpha]_D^{20}$   $+21$  ( $c$  1.0, H<sub>2</sub>O), lit<sup>12</sup>  $[\alpha]_D^{20}$   $+20.6$  ( $c$  0.32, H<sub>2</sub>O); m.p. 204–206 °C (dec);  $^1\text{H}$  NMR (400 MHz, D<sub>2</sub>O):  $\delta$  7.57–7.55 (m, 1H), 7.55–7.40 (m, 1H), 7.30–7.20 (m, 1H), 7.20–7.15 (m, 1H), 5.51 (d,  $J$  = 4.4 Hz, 1H), 3.99 (d,  $J$  = 4.8 Hz, 1H).  $^{13}\text{C}$  NMR (100 MHz, D<sub>2</sub>O):  $\delta$  171.7, 130.5, 130.4, 127.5, 124.7, 115.6, 115.4, 66.3, 59.2.

**(2R, 3S)-2-Amino-3-hydroxy-3-(*o*-chlorophenyl)propanoic acid (5h):** White solid (209 mg, 81 %),  $[\alpha]_D^{20}$   $+34$  ( $c$  1.0, H<sub>2</sub>O); m.p. 206–208 °C (dec);  $^1\text{H}$  NMR (400 MHz, D<sub>2</sub>O):  $\delta$  7.64 (d,  $J$  = 7.2 Hz, 1H), 7.50–7.36 (m, 3H), 5.68 (d,  $J$  = 3.2 Hz, 1H), 4.10 (d,  $J$  = 3.6 Hz, 1H).  $^{13}\text{C}$  NMR (100 MHz, D<sub>2</sub>O):  $\delta$  171.9, 136.3, 131.5, 129.9, 129.8, 127.5, 127.4, 68.2, 58.1.

**Methyl (2*R*, 3*R*)-2-benzotylamino-3-hydroxy-4-methyl pentanoate 8:** Dry hydrogen chloride was passed rapidly into a stirred suspension of (2*R*, 3*R*)-3-hydroxyleucine **5c** (292 mg, 2 mmol) in methol until the solution was boiled. The introduction of HCl was terminated, and the solution was stirred at rt. for 24 h, concentrated. The crude material used for the next step without further purification. Methyl ester was dissolved in methol (10 mL) and treated with triethylamine (0.84 mL, 6 mmol). After stirring at rt. for 15 min, the solution was cooled to 0 °C. Then benzoyl chloride was added and stirred at 0 °C for another 2 h. The reaction mixture was quenched with H<sub>2</sub>O (1 mL). Then methol was removed and aqueous was extracted with DCM (3×10 mL). The combined organic layer dried over Na<sub>2</sub>SO<sub>4</sub>, filtered and concentrated. Flash chromatography (4:1 petrol ether/EtOAc) afford **8** (405 mg 77 %) as colorless oil.  $[\alpha]_D^{20}$  -38 (C 0.038, CHCl<sub>3</sub>); <sup>1</sup>H NMR (400 MHz, CDCl<sub>3</sub>): δ 1.00 (d, *J* = 6.8 Hz, 3H), 1.02 (d, *J* = 6.8 Hz, 3H), 1.74–1.80 (m, 1H), 3.18 (d, *J* = 6.4 Hz, 1H), 3.59–3.60 (m, 1H), 3.76 (s, 3H), 4.95 (dd, *J* = 3.6, 7.6 Hz, 1H), 7.23 (d, *J* = 7.6 Hz, 1H), 7.40–7.44 (m, 2H), 7.49–7.52 (m, 1H), 7.80 (d, *J* = 7.6 Hz, 2H); <sup>13</sup>C NMR (100 MHz, CDCl<sub>3</sub>): δ 18.9, 19.0, 31.4, 52.5, 55.8, 78.7, 127.1, 128.5, 131.9, 133.3, 167.4, 171.4; HRMS (ESI): Calcd for C<sub>14</sub>H<sub>20</sub>NO<sub>4</sub> [M+H]<sup>+</sup>: 266.1387, found 266.1388.

**Methyl (4*R*, 5*R*)-5-Isopropyl-2-phenyl-4, 5-dihydrooxazole-4-carboxylate 10:** Dry hydrogen chloride was passed rapidly into a stirred suspension of (2*R*, 3*R*)-3-hydroxyleucine **5c** (292 mg, 0.2 mmol) in methol until the solution was boiled. The introduction of HCl was terminated, and the solutuin was stirred at rt. for 24 h. It was then concentrated and methol was removed under high vacuum without any purification, methyl ester and p-TsOH.H<sub>2</sub>O (38 mg, 0.2 mmol) in dimethoxyl ethane (5 mL) was

treated with trimethyl orthoacetate (0.103 mL 0.6 mmol), heated at reflux for 4 h. the solution mixture was cooled to rt. and quenched with H<sub>2</sub>O (2 mL), the aqueous layer was separated and extracted with ether (3×5 mL). The combined organic layer was washed with brine and dried over Na<sub>2</sub>SO<sub>4</sub>, filtered and concentrated. Flash chromatography (8:1 petrol ether/EtOAc) afford **10** (402 mg 82 %) as colourless oil.  $[\alpha]_D^{20} +74$  (C 0.04, CHCl<sub>3</sub>); IR<sub>max</sub> (film): 2924, 1733, 1642, 1438, 1386; <sup>1</sup>H NMR (400 MHz, CDCl<sub>3</sub>): δ 1.02 (d, *J* = 6.8 Hz, 3H), 1.07 (d, *J* = 6.4 Hz, 3H), 2.06–2.01 (m, 1H), 3.77 (s, 3H), 4.54 (dd, *J* = 8, 9.6 Hz, 1H), 4.95 (d, *J* = 9.6 Hz, 1H), 7.40–7.44 (m, 2H), 7.49–7.51 (m, 1H), 7.98–8.00 (m, 2H); <sup>13</sup>C NMR (100 MHz, CDCl<sub>3</sub>): δ 18.7, 19.6, 29.2, 52.0, 70.6, 87.6, 127.2, 128.3, 128.5, 131.8, 166.7, 170.5; HRMS (ESI): Calcd for C<sub>14</sub>H<sub>18</sub>NO<sub>3</sub> [M+H]<sup>+</sup>: 248.1281, found 247.1287.

**Methyl(4*S*,5*S*)-5-Isopropyl-2-phenyl-4,5-dihydrooxazole-4-carboxylate 11:** Following the procedure described for **10**. only change (2*R*,3*R*) 3-hydroxyleucine **5c** into (2*S*, 3*S*) 3-hydroxyleucine **4c**. Colourless oil;  $[\alpha]_D^{20} -74$  (C 0.04, CHCl<sub>3</sub>); IR<sub>max</sub> (film): 2924, 1740, 1645, 1443, 1372; <sup>1</sup>H NMR (300 MHz, CDCl<sub>3</sub>): δ 1.02 (d, *J* = 6.9 Hz, 3H), 1.06 (d, *J* = 6.3 Hz, 3H), 2.03–2.12 (m, 1H), 3.77 (s, 3H), 4.54 (dd, *J* = 8.4, 9.9 Hz, 1H), 4.95 (d *J* = 9.9 Hz, 1H), 7.42–7.45 (m, 2H), 7.49–7.54 (m, 1H), 7.98–8.01 (m, 2H); <sup>13</sup>C NMR (75 MHz, CDCl<sub>3</sub>): δ 18.7, 19.6, 29.2, 52.0, 70.6, 87.6, 127.2, 128.3, 128.5, 131.8, 166.7, 170.5; HRMS (ESI): Calcd for C<sub>14</sub>H<sub>18</sub>NO<sub>3</sub> [M+H]<sup>+</sup>: 248.1281, found 247.1284.

**Methyl (2*S*,3*S*)-2-benzotylamino-3-hydroxy-4-methyl pentanoate 12:** Following the procedure described for **8**. only change (2*R*,3*R*)-3-hydroxyleucine **5c** into (2*S*, 3*S*)-3-hydroxyleucine **4c**. Colourless oil;  $[\alpha]_D^{20} +38$  (C 0.038, CHCl<sub>3</sub>); <sup>1</sup>H NMR (400

MHz, CDCl<sub>3</sub>):  $\delta$  1.00 (d,  $J$  = 6.8 Hz, 3H), 1.03 (d,  $J$  = 6.8 Hz, 3H), 1.74–1.80 (m, 1H), 3.09 (d,  $J$  = 8 Hz, 1H), 3.59–3.62 (m, 1H), 3.80 (s, 3H), 4.96 (dd,  $J$  = 3.6, 7.6 Hz, 1H), 7.20 (d,  $J$  = 7.6 Hz, 1H), 7.41–7.45 (m, 2H), 7.50–7.54 (m, 1H), 7.80–7.83 (m, 2H); <sup>13</sup>C NMR (100 MHz, CDCl<sub>3</sub>):  $\delta$  18.9, 19.0, 31.5, 52.6, 55.9, 78.8, 127.2, 128.6, 132.0, 133.4, 167.4, 171.4; HRMS (ESI): Calcd for C<sub>14</sub>H<sub>20</sub>NO<sub>4</sub>[M+H]<sup>+</sup>: 266.1387, found 266.1393.

# <sup>1</sup>H NMR and <sup>13</sup>C NMR spectra of typical compounds

<sup>1</sup>H NMR spectrum of compound **2a'** (400 MHz, CDCl<sub>3</sub>)

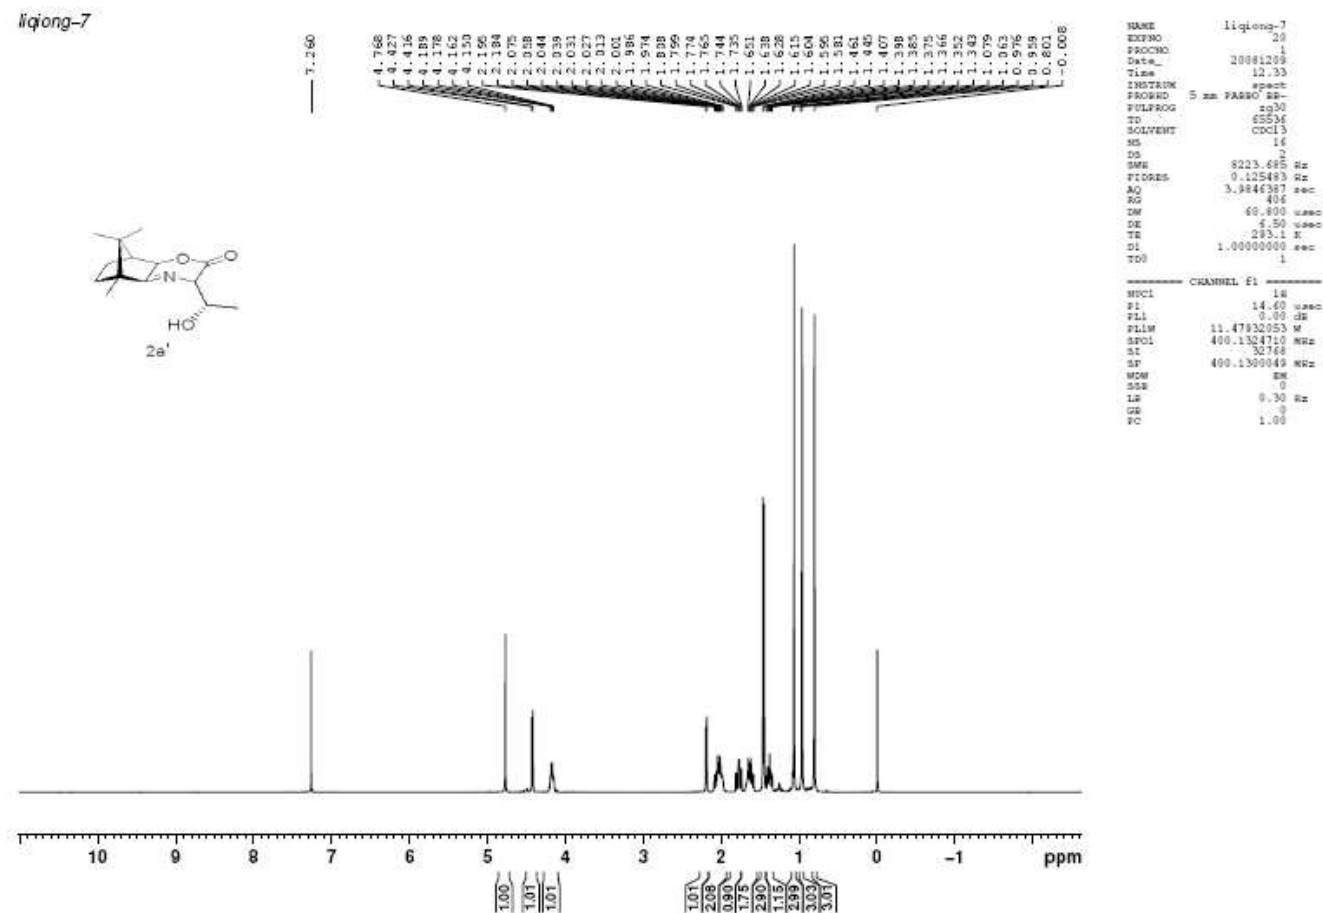



$^{13}\text{C}$  NMR spectrum of compound **2a'** (100 MHz,  $\text{CDCl}_3$ )

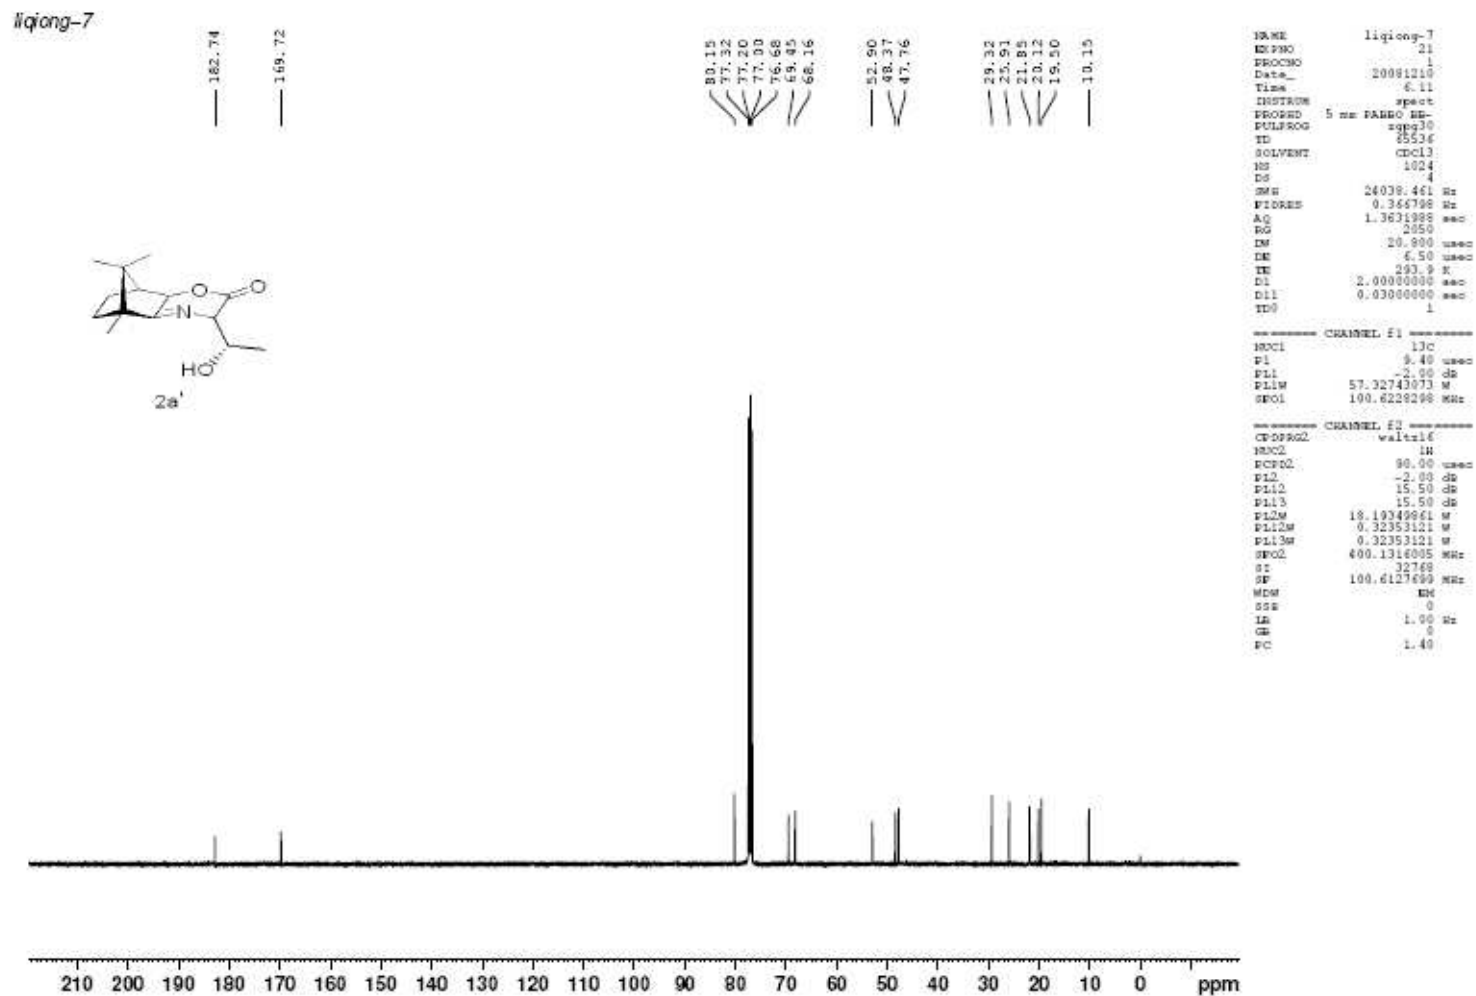

$^1\text{H}$  NMR spectrum of compound **2b'** (400 MHz,  $\text{CDCl}_3$ )

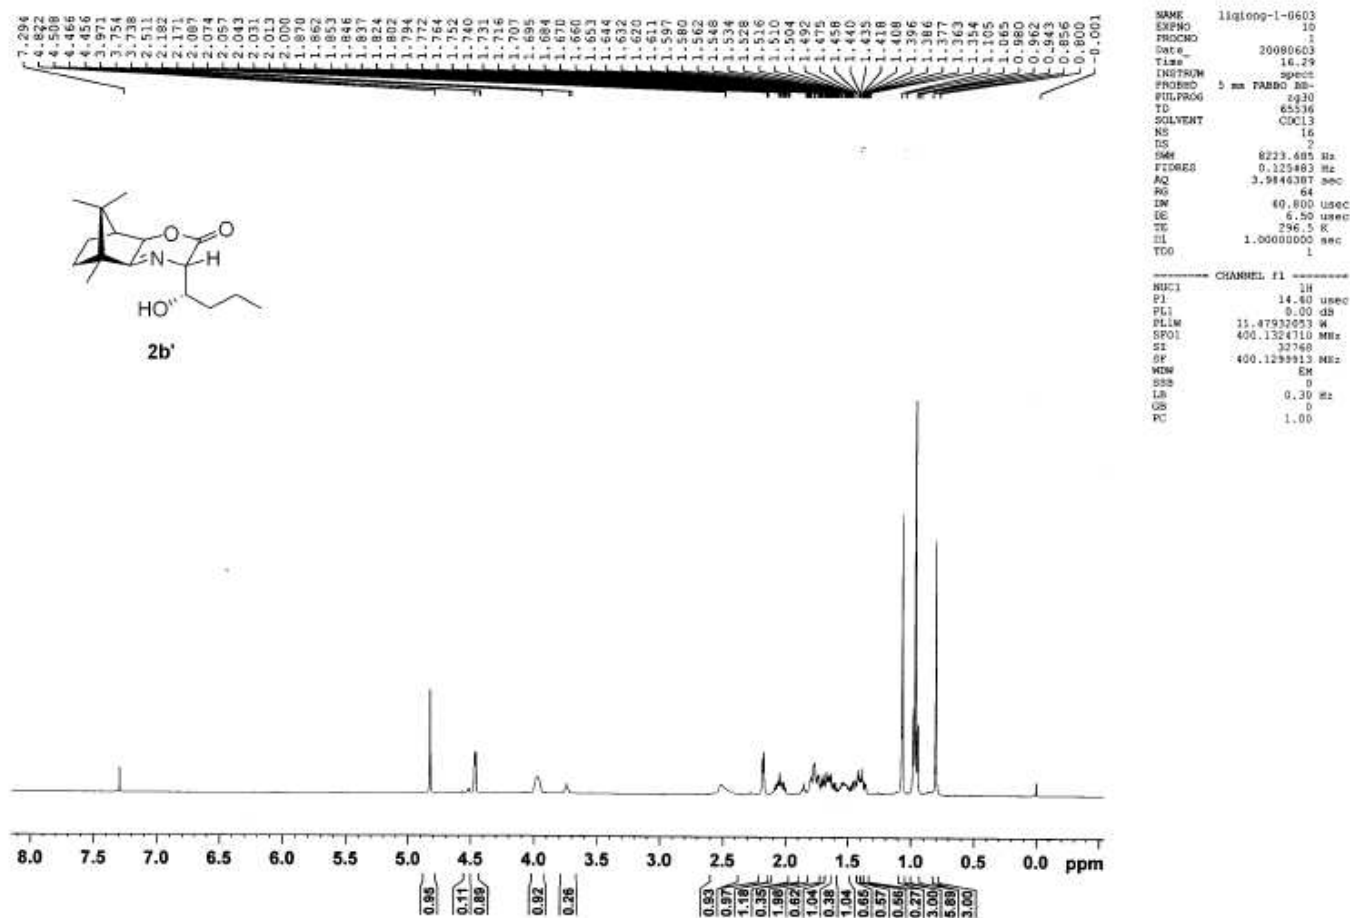

$^{13}\text{C}$  NMR spectrum of compound **2b'** (100 MHz,  $\text{CDCl}_3$ )

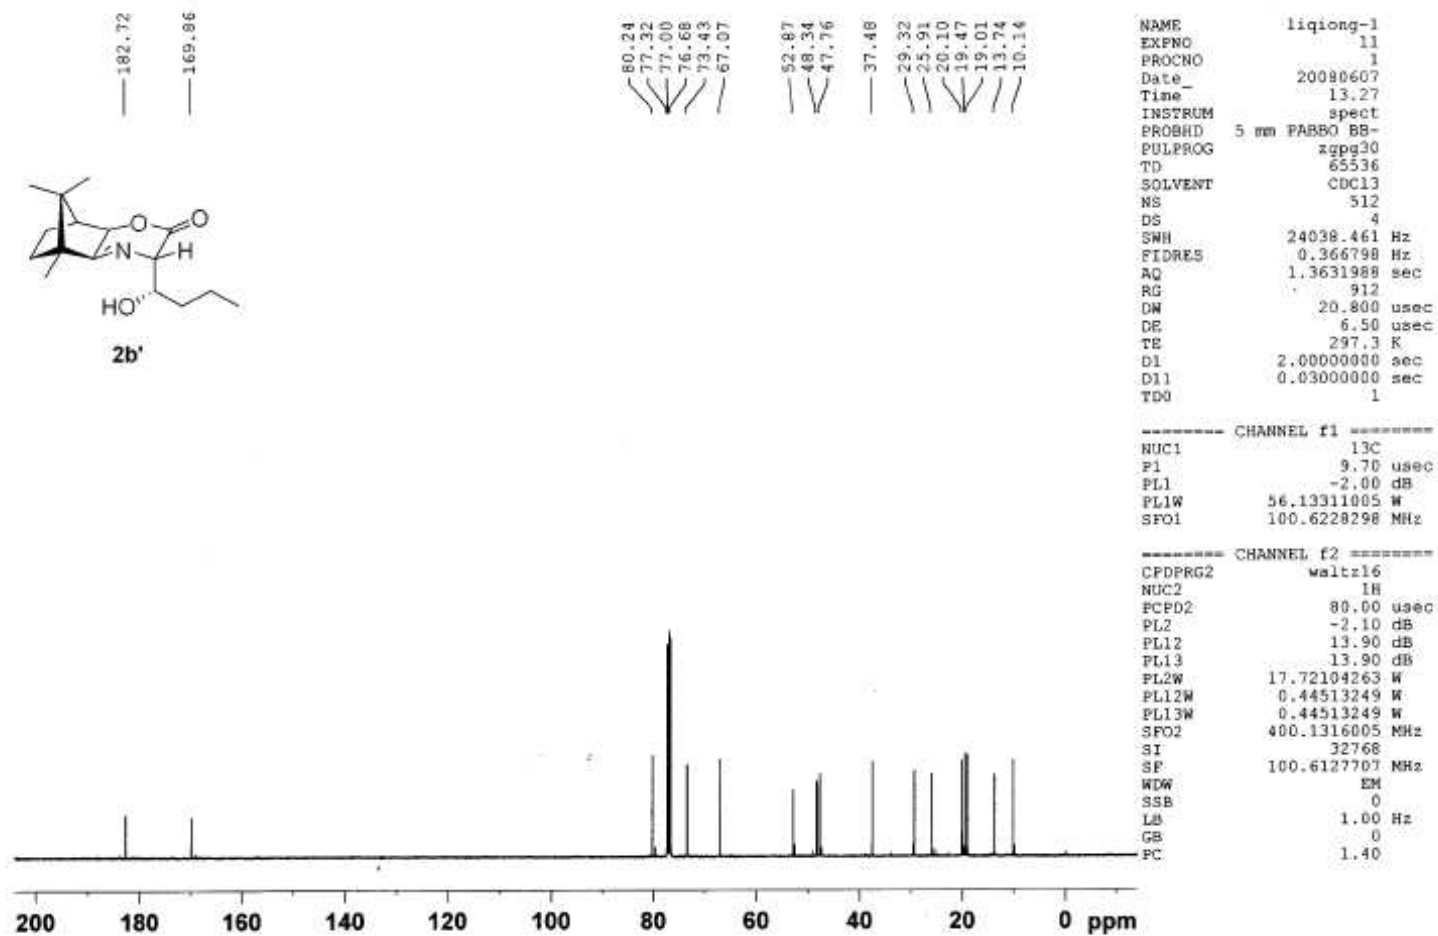

$^1\text{H}$  NMR spectrum of compound **2c'** (400 MHz,  $\text{CDCl}_3$ )

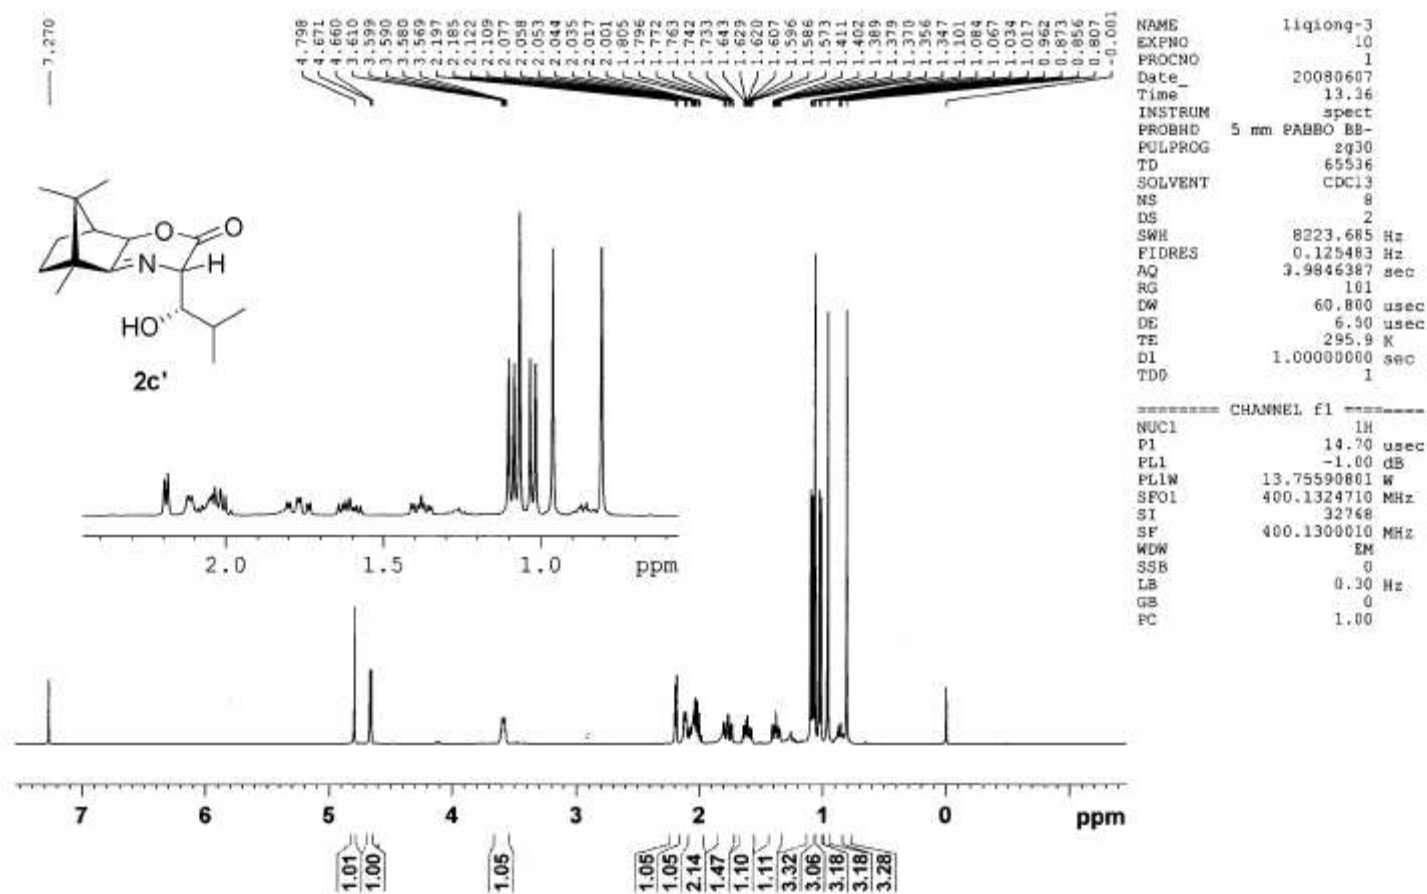

$^{13}\text{C}$  NMR spectrum of compound **2c'** (100 MHz,  $\text{CDCl}_3$ )

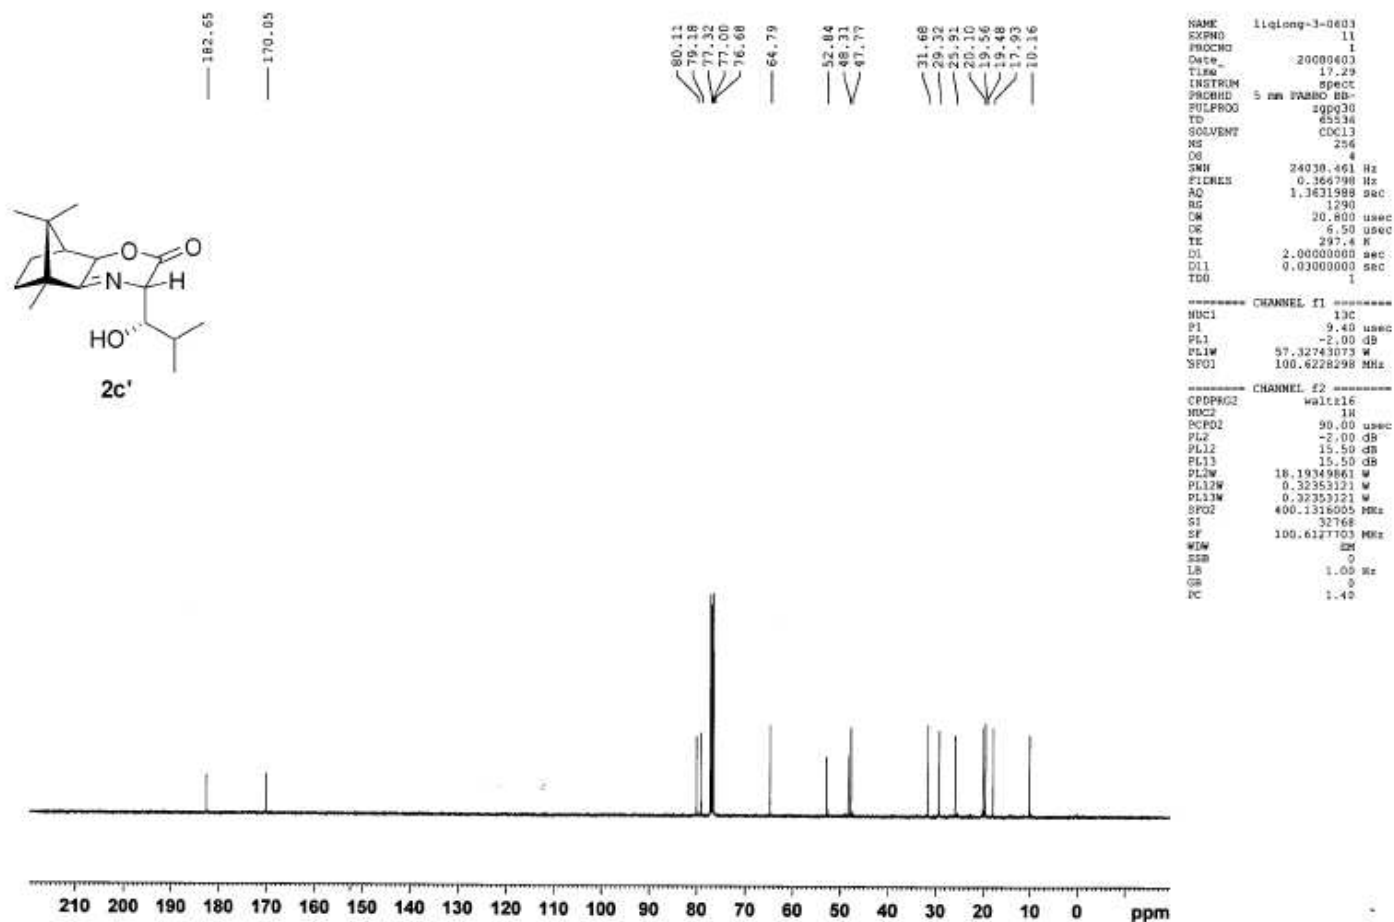

$^1\text{H}$  NMR spectrum of compound **2d'** (300 MHz,  $\text{CDCl}_3$ )

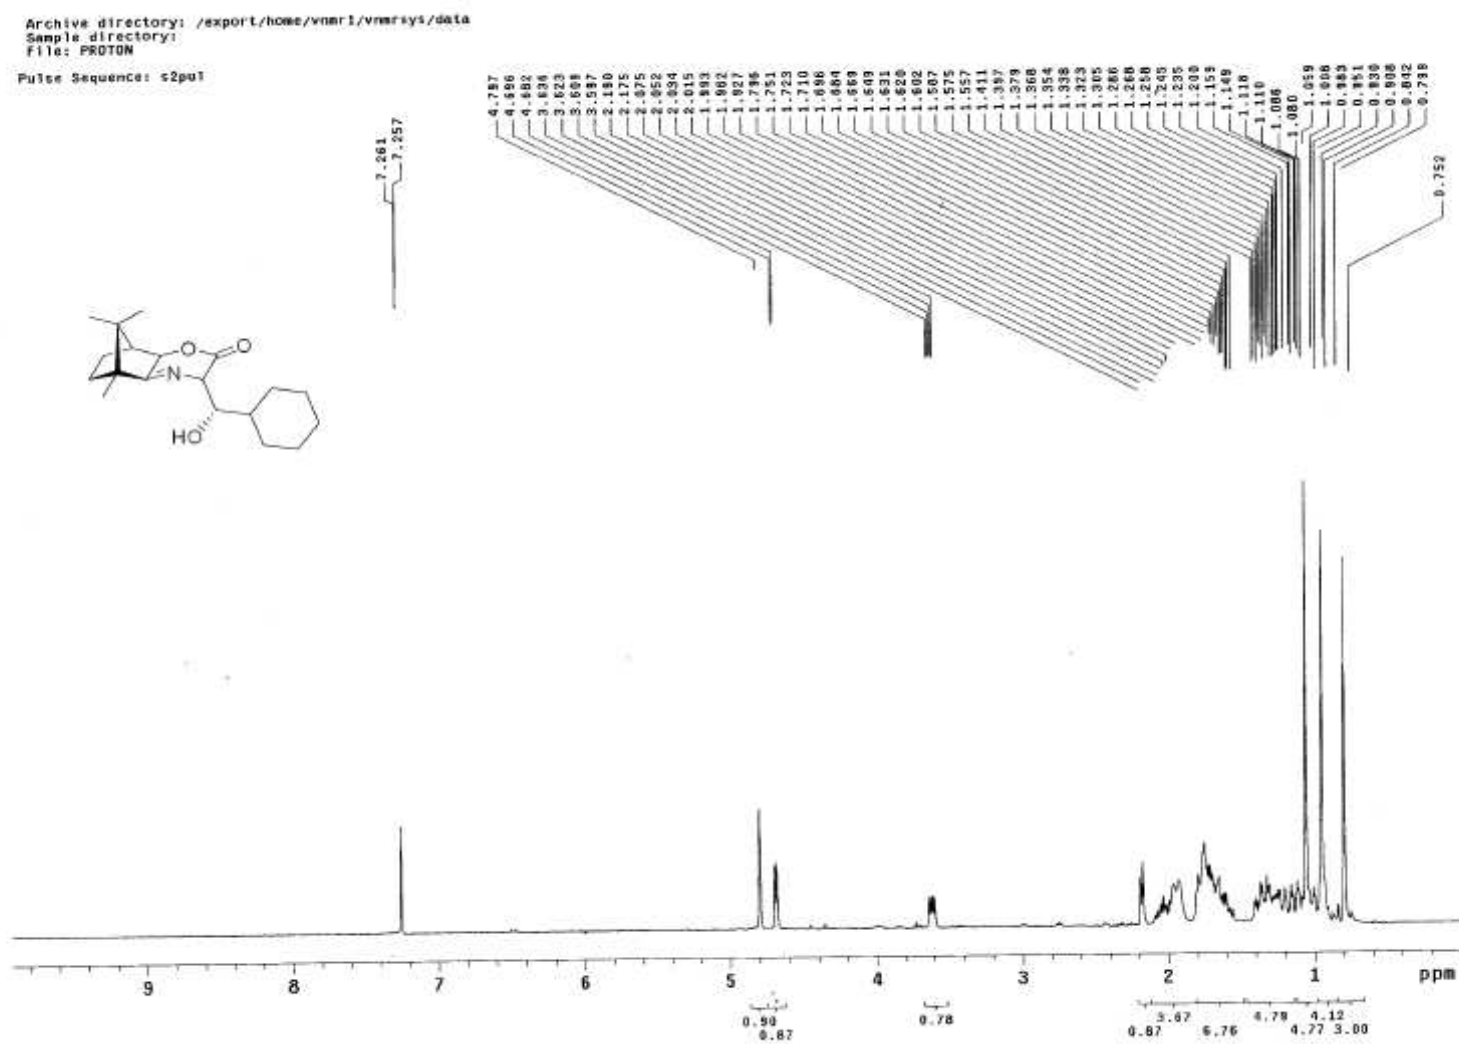

$^{13}\text{C}$  NMR spectrum of compound **2d'** (75 MHz,  $\text{CDCl}_3$ )

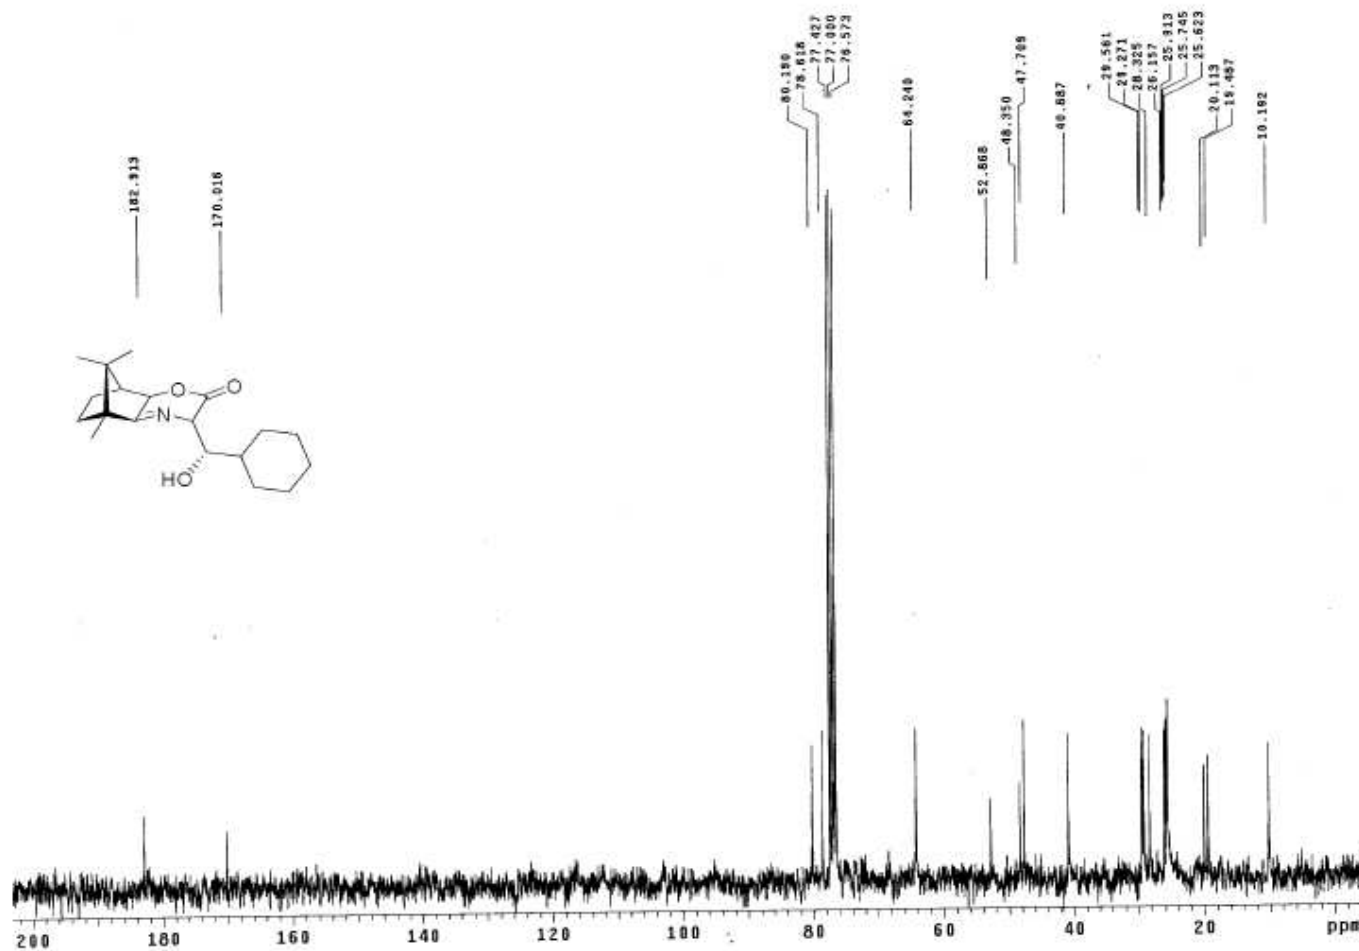

$^1\text{H}$  NMR spectrum of compound **2e** (400 MHz,  $\text{CDCl}_3$ )

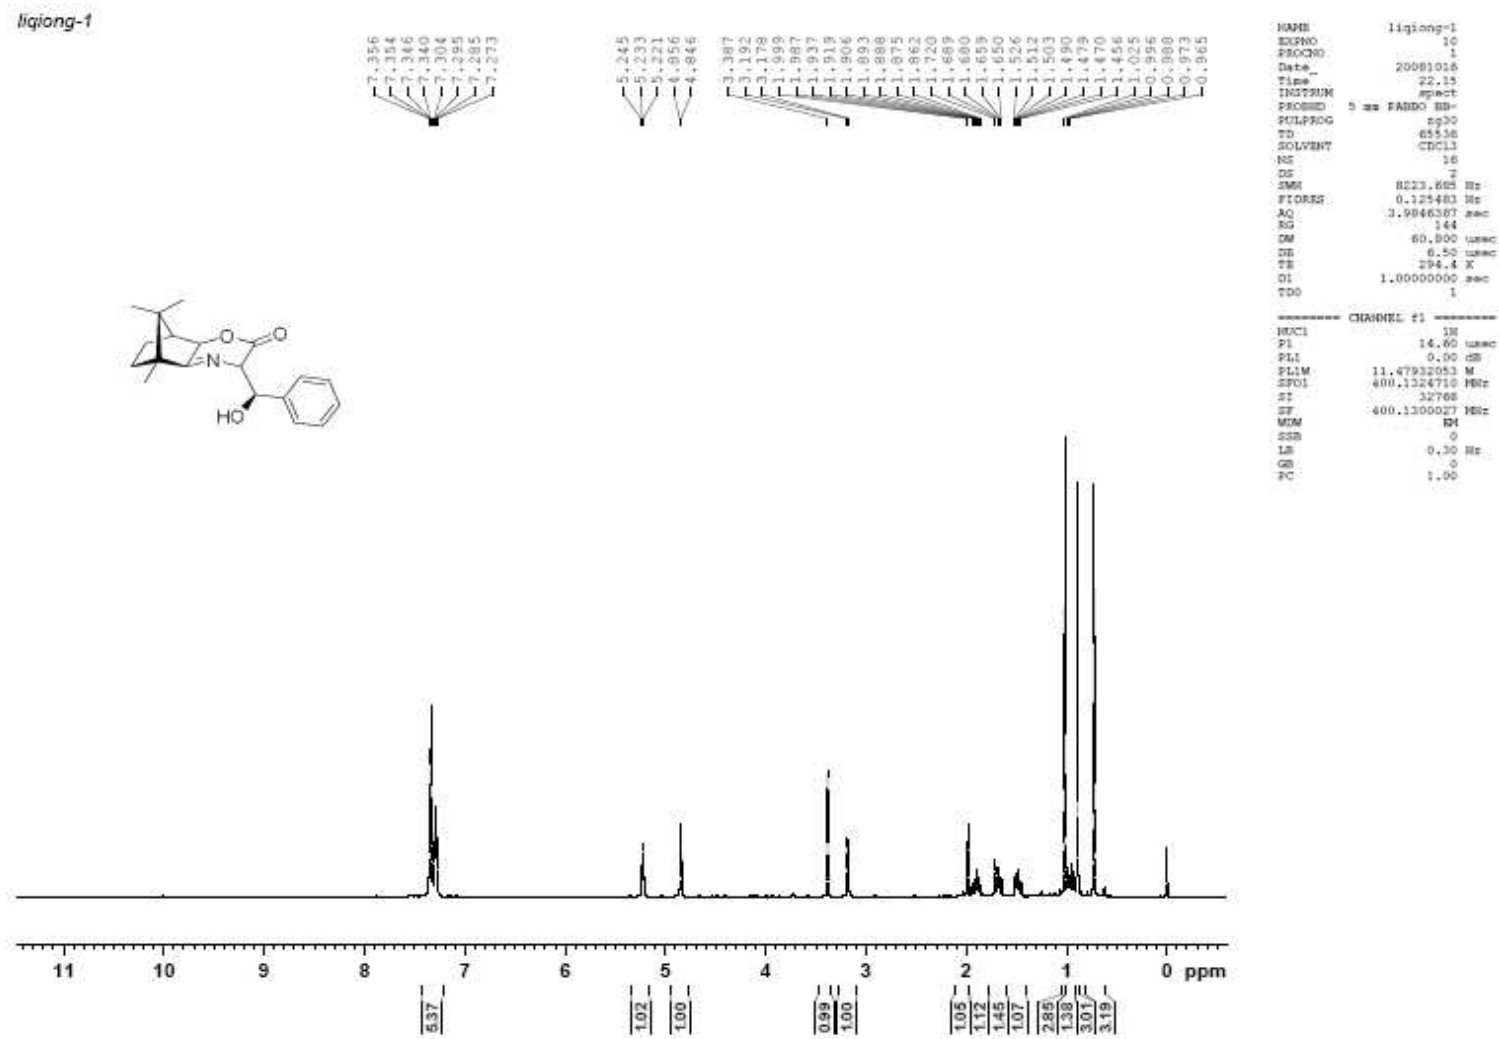



$^{13}\text{C}$  NMR spectrum of compound **2e** (100 MHz,  $\text{CDCl}_3$ )

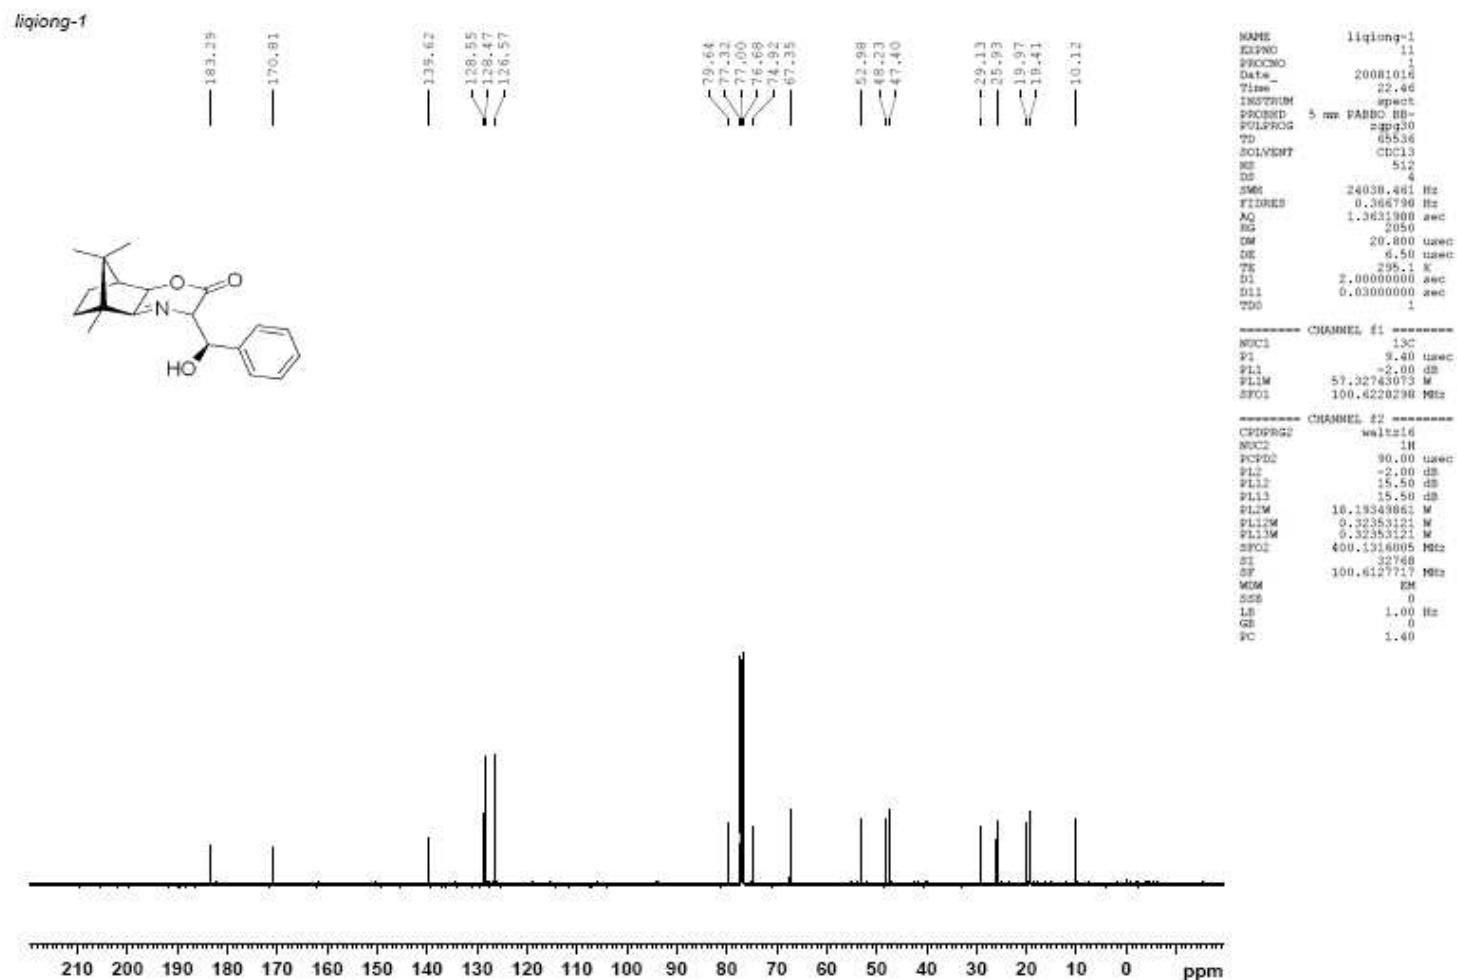

$^1\text{H}$  NMR spectrum of compound **2f** (400 MHz,  $\text{CDCl}_3$ )

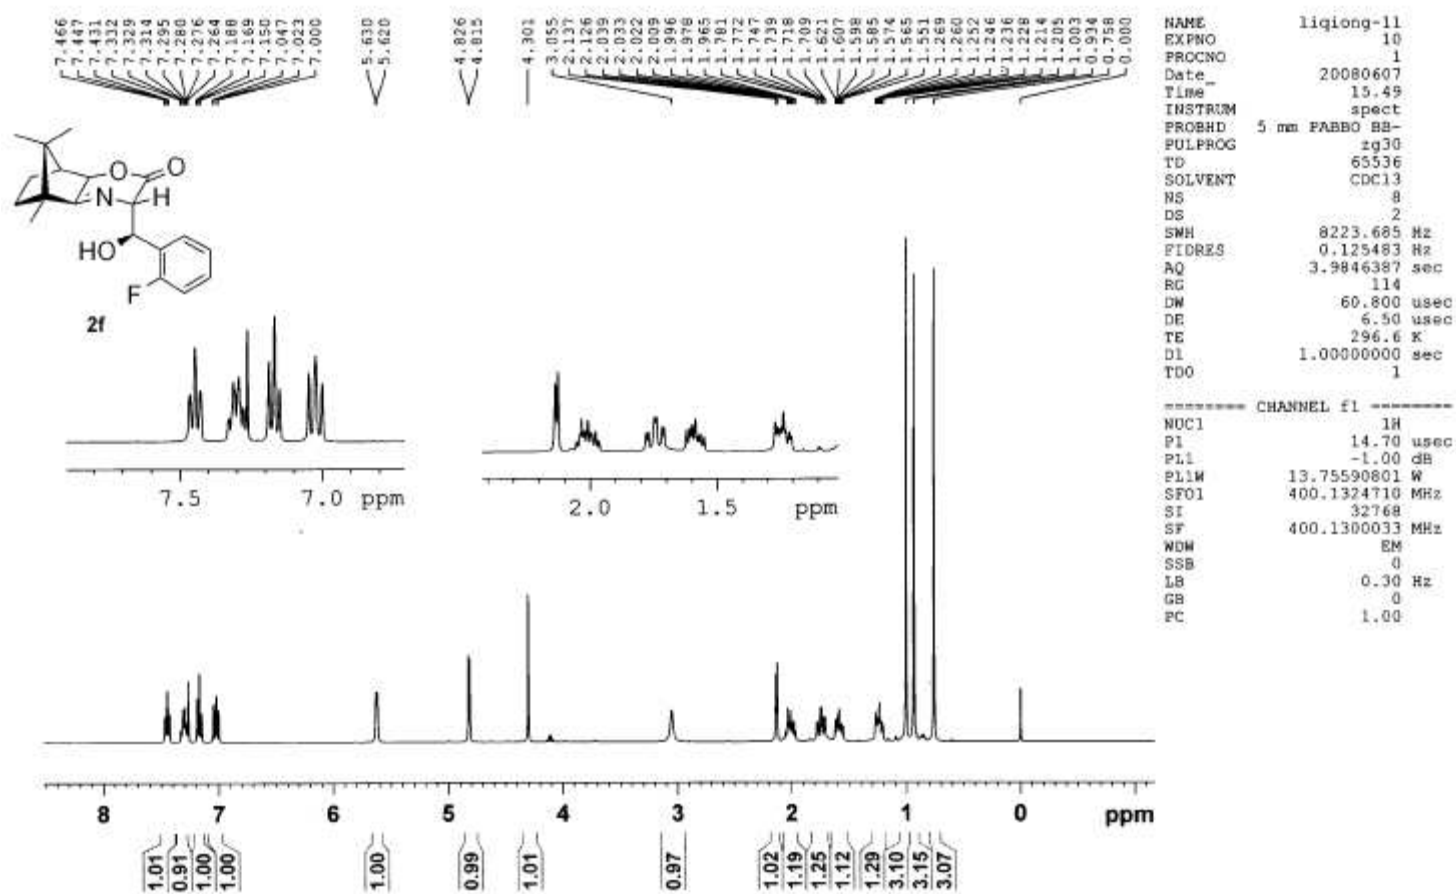

$^{13}\text{C}$  NMR spectrum of compound **2f** (100 MHz,  $\text{CDCl}_3$ )

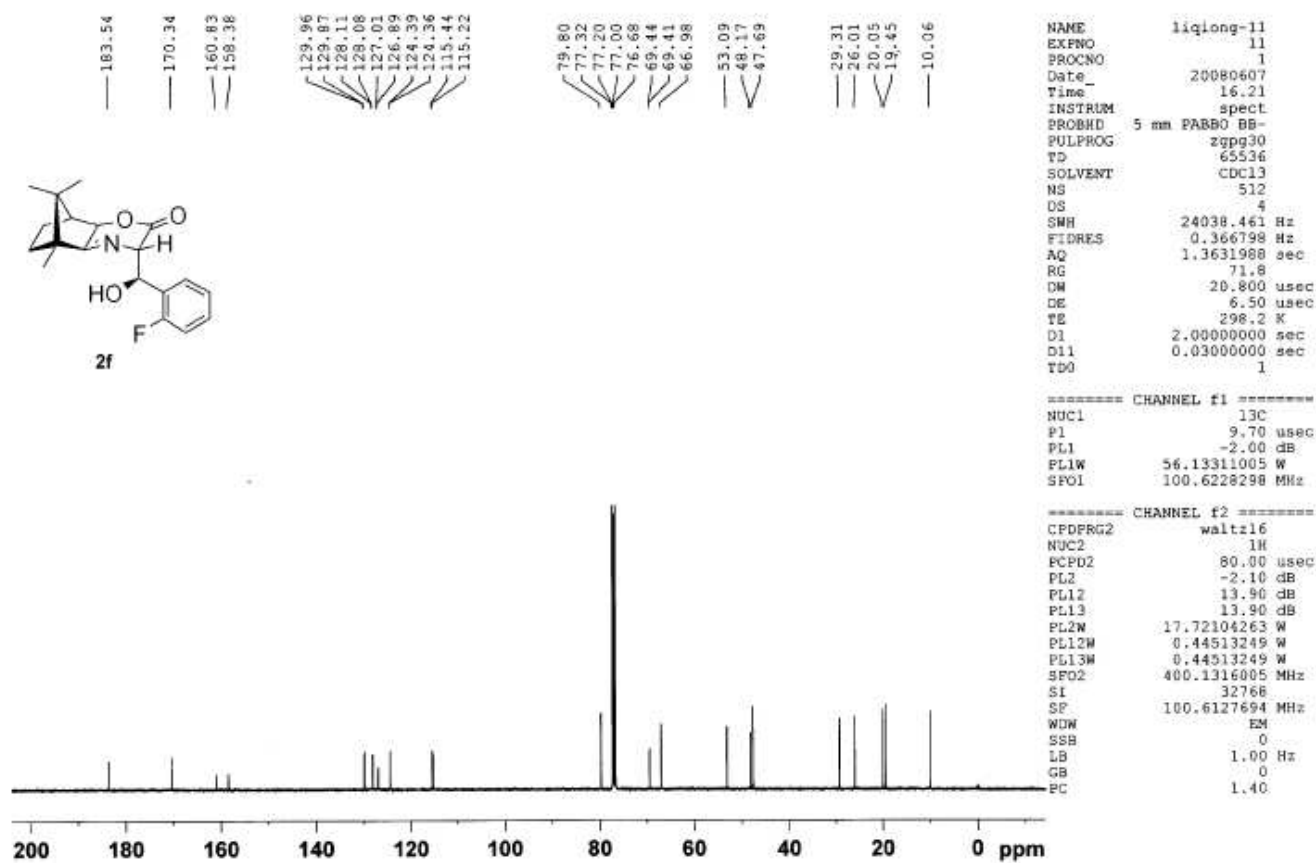

$^1\text{H}$  NMR spectrum of compound **2g** (400 MHz,  $\text{CDCl}_3$ )

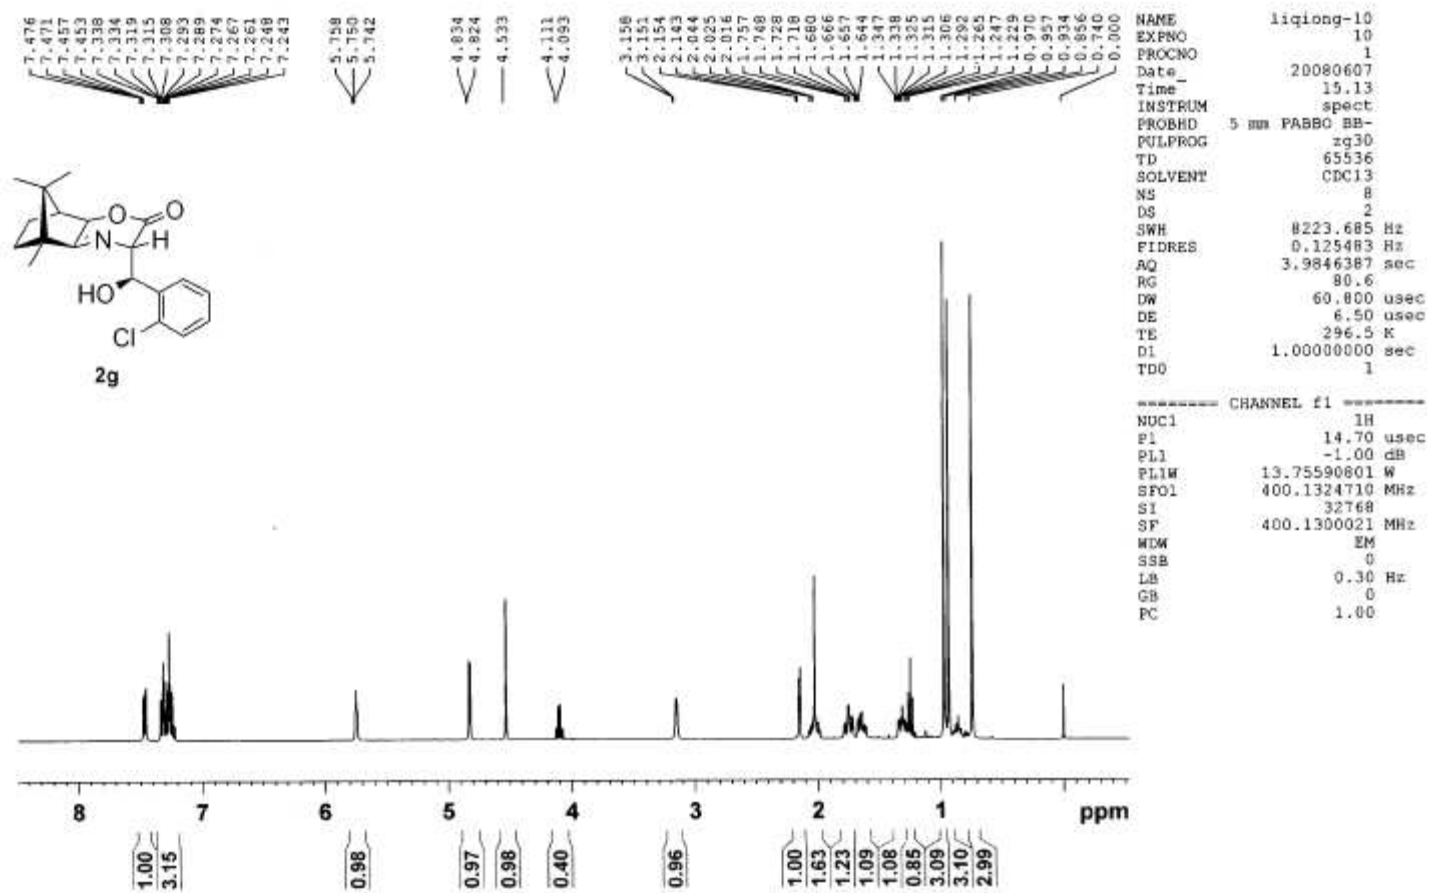

$^{13}\text{C}$  NMR spectrum of compound **2g** (100 MHz,  $\text{CDCl}_3$ )

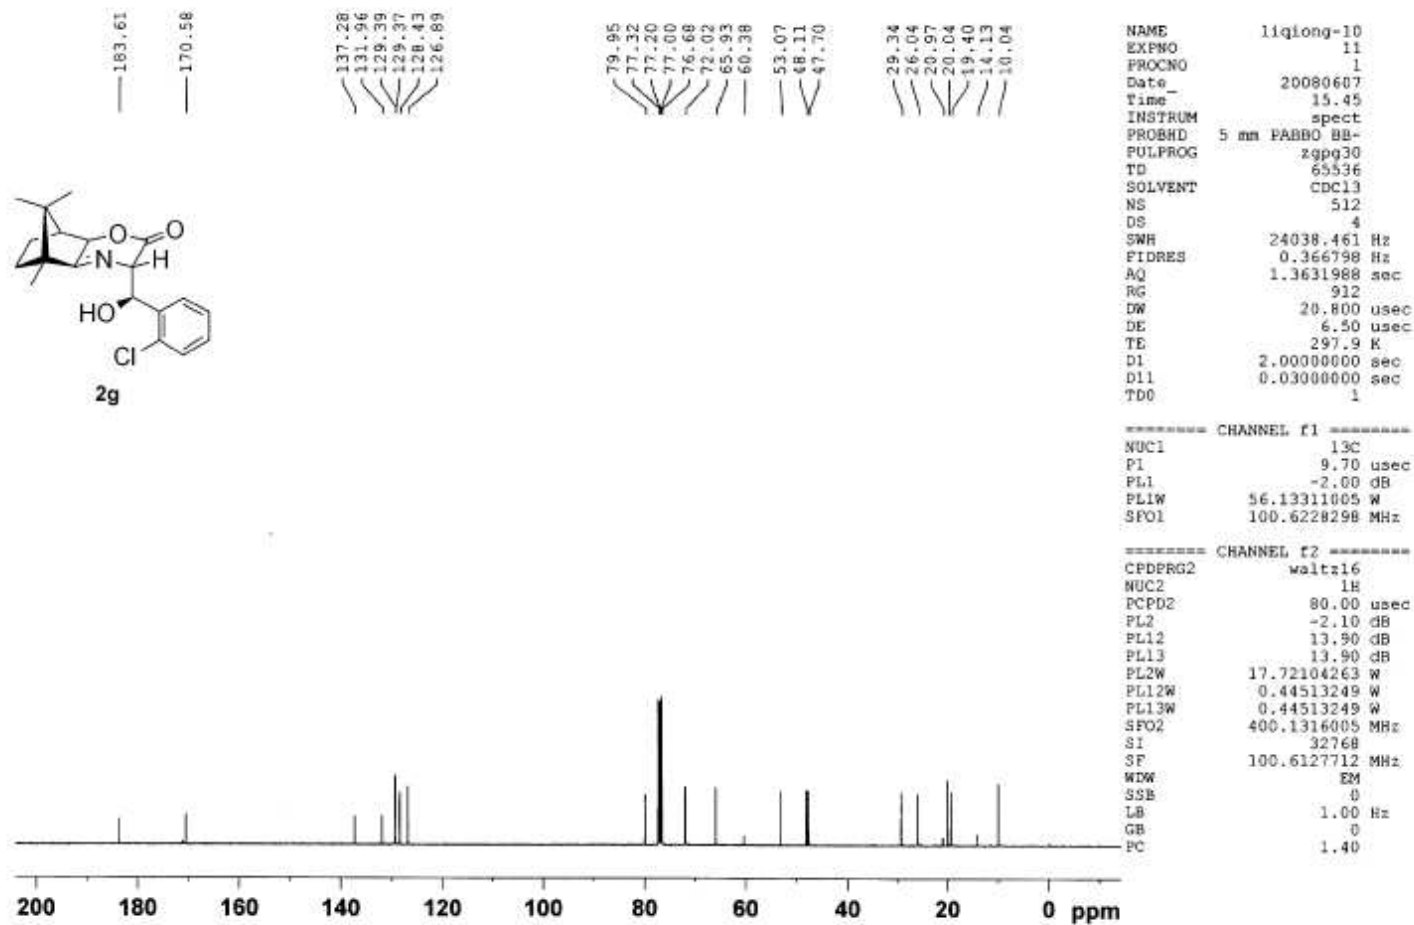

$^1\text{H}$  NMR spectrum of compound **2h** (400 MHz,  $\text{CDCl}_3$ )

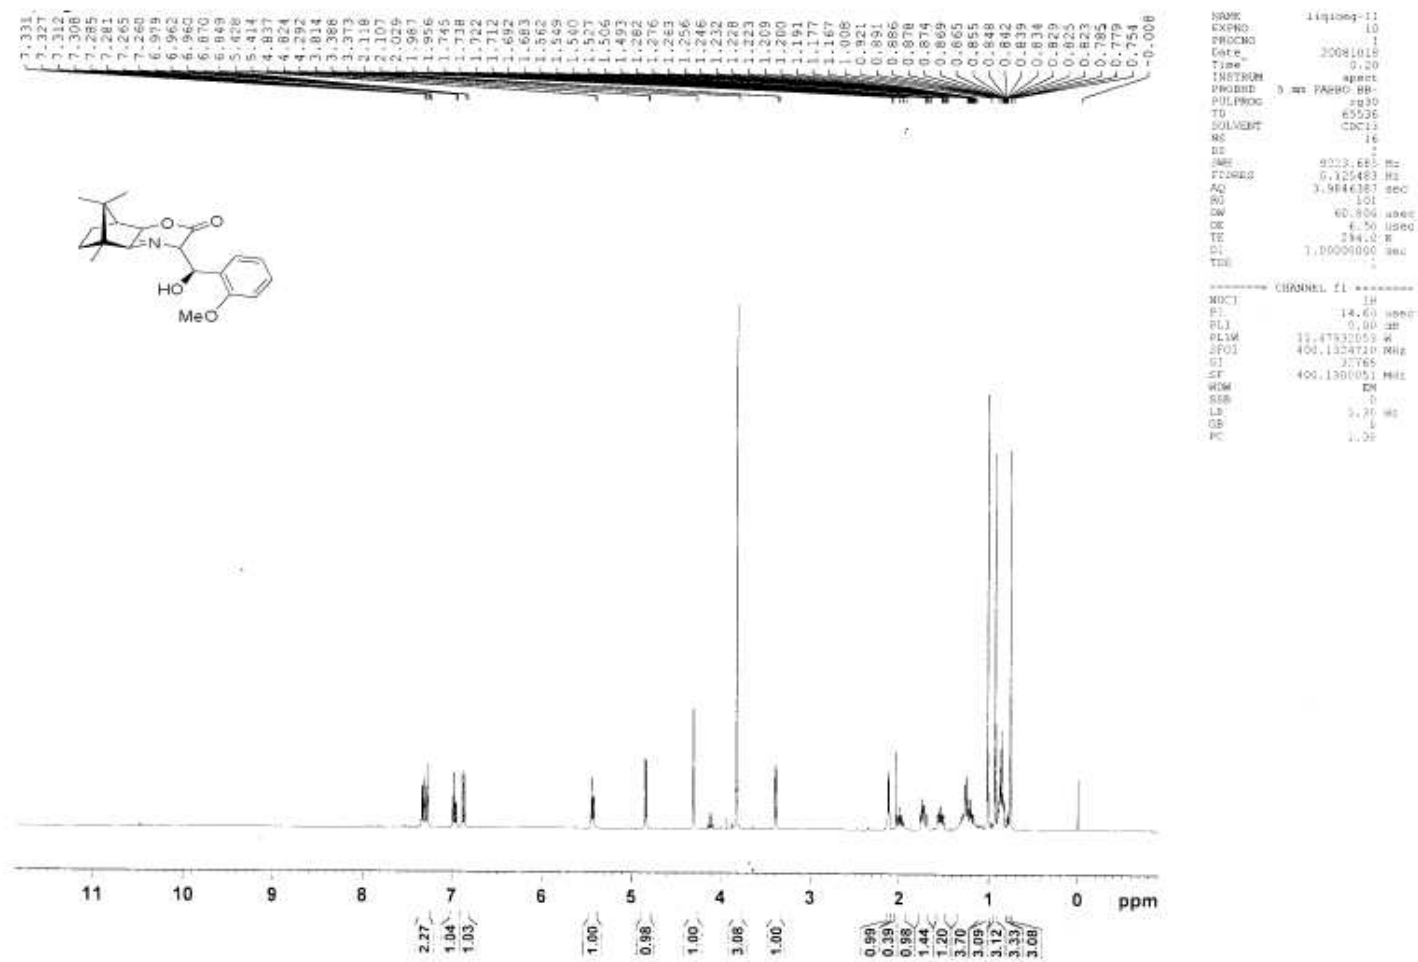

$^{13}\text{C}$  NMR spectrum of compound **2h** (100 MHz,  $\text{CDCl}_3$ )

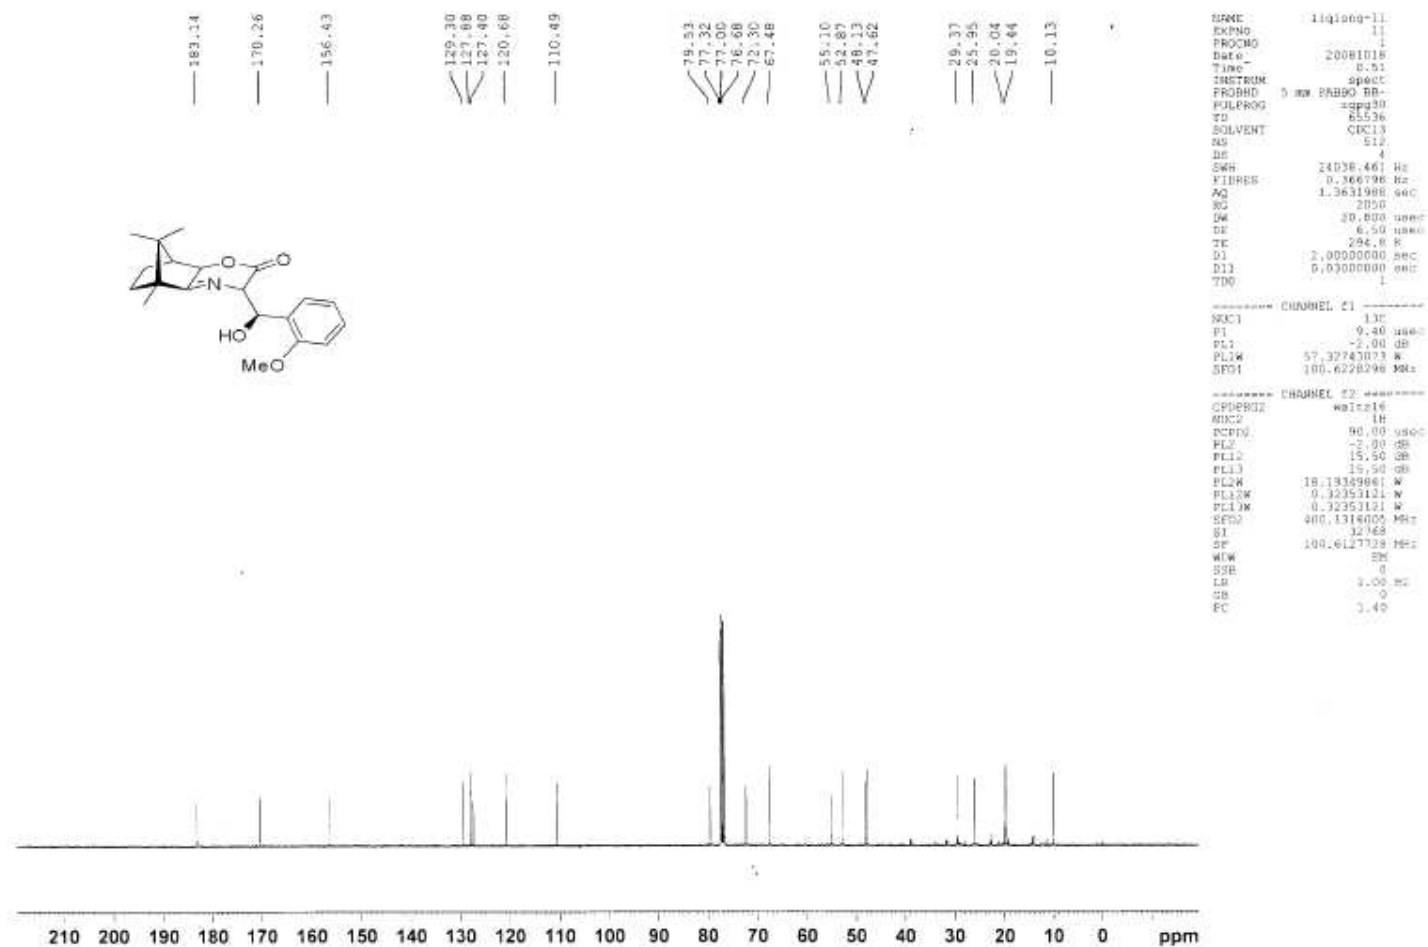

$^1\text{H}$  NMR spectrum of compound **3a'** (400 MHz,  $\text{CDCl}_3$ )

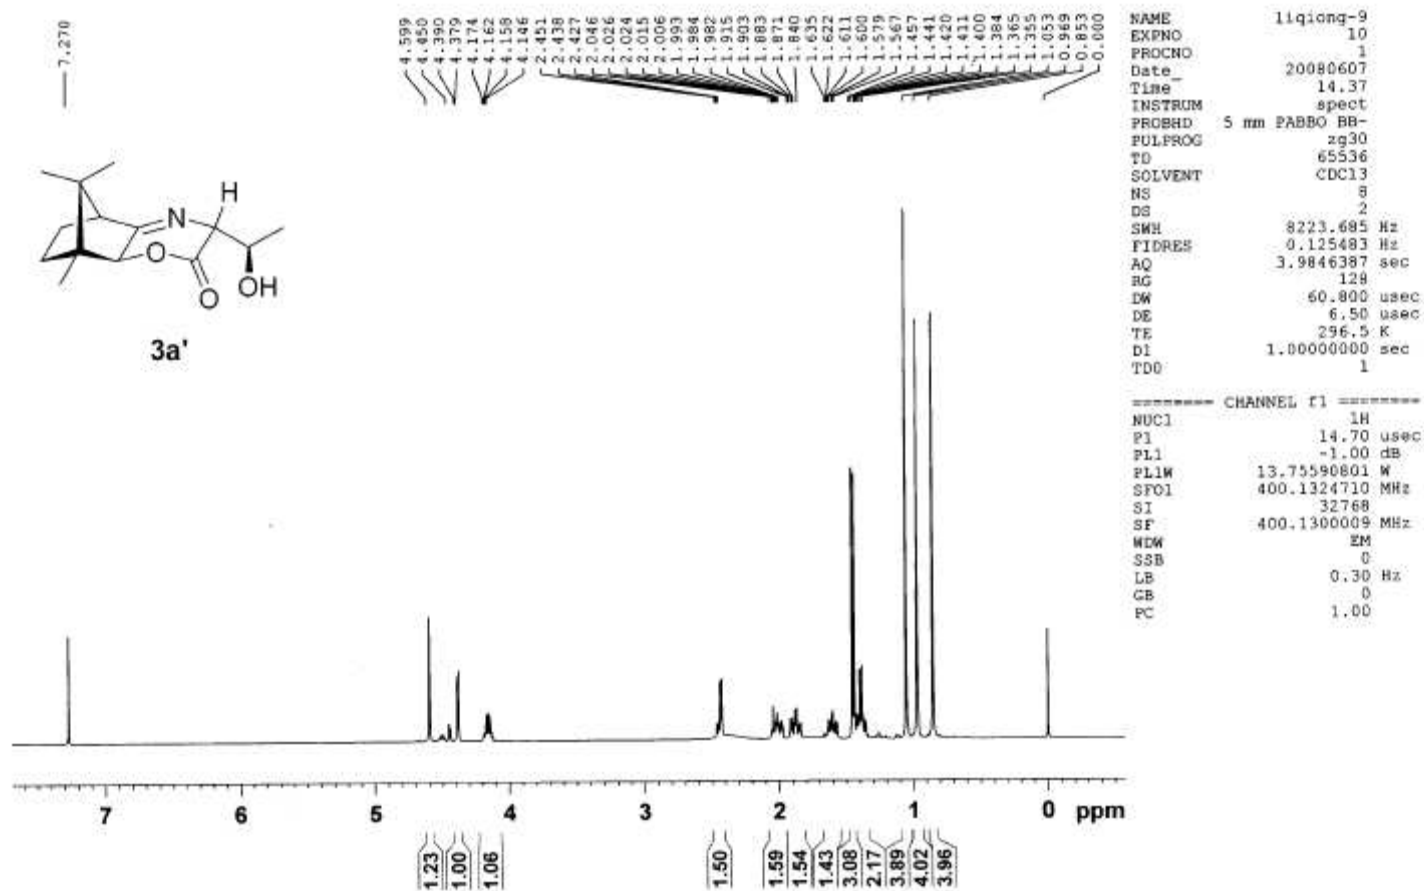



$^{13}\text{C}$  NMR spectrum of compound **3a'** (100 MHz,  $\text{CDCl}_3$ )

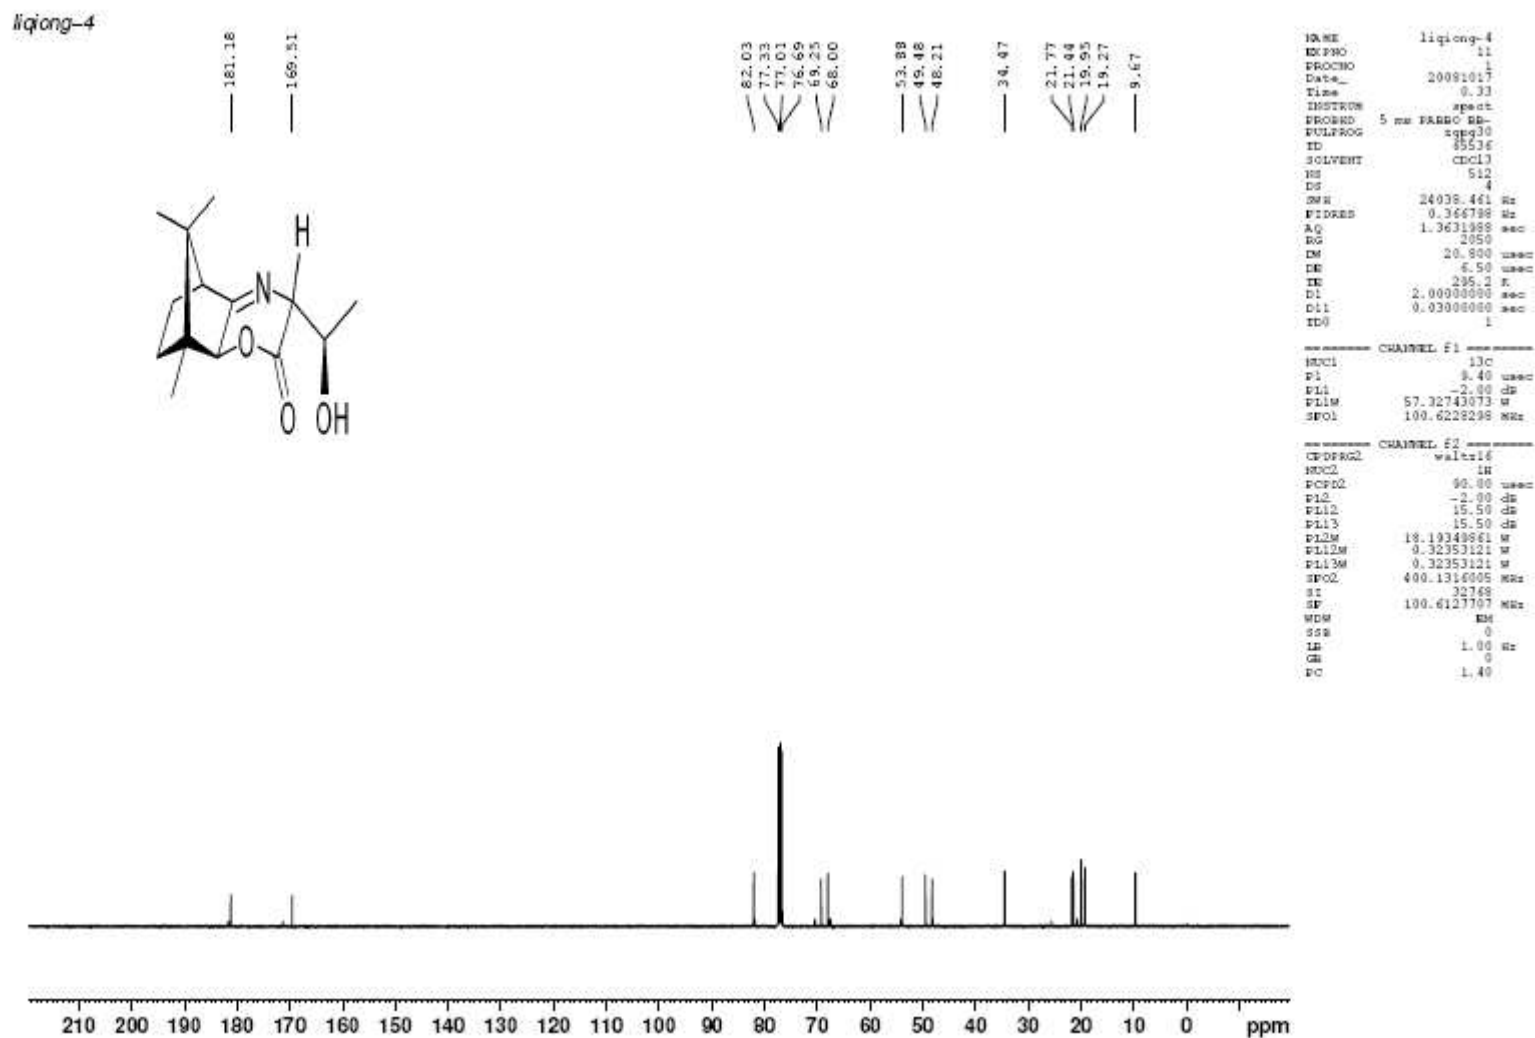

$^1\text{H}$  NMR spectrum of compound **3a** (minor) (400 MHz,  $\text{CDCl}_3$ )

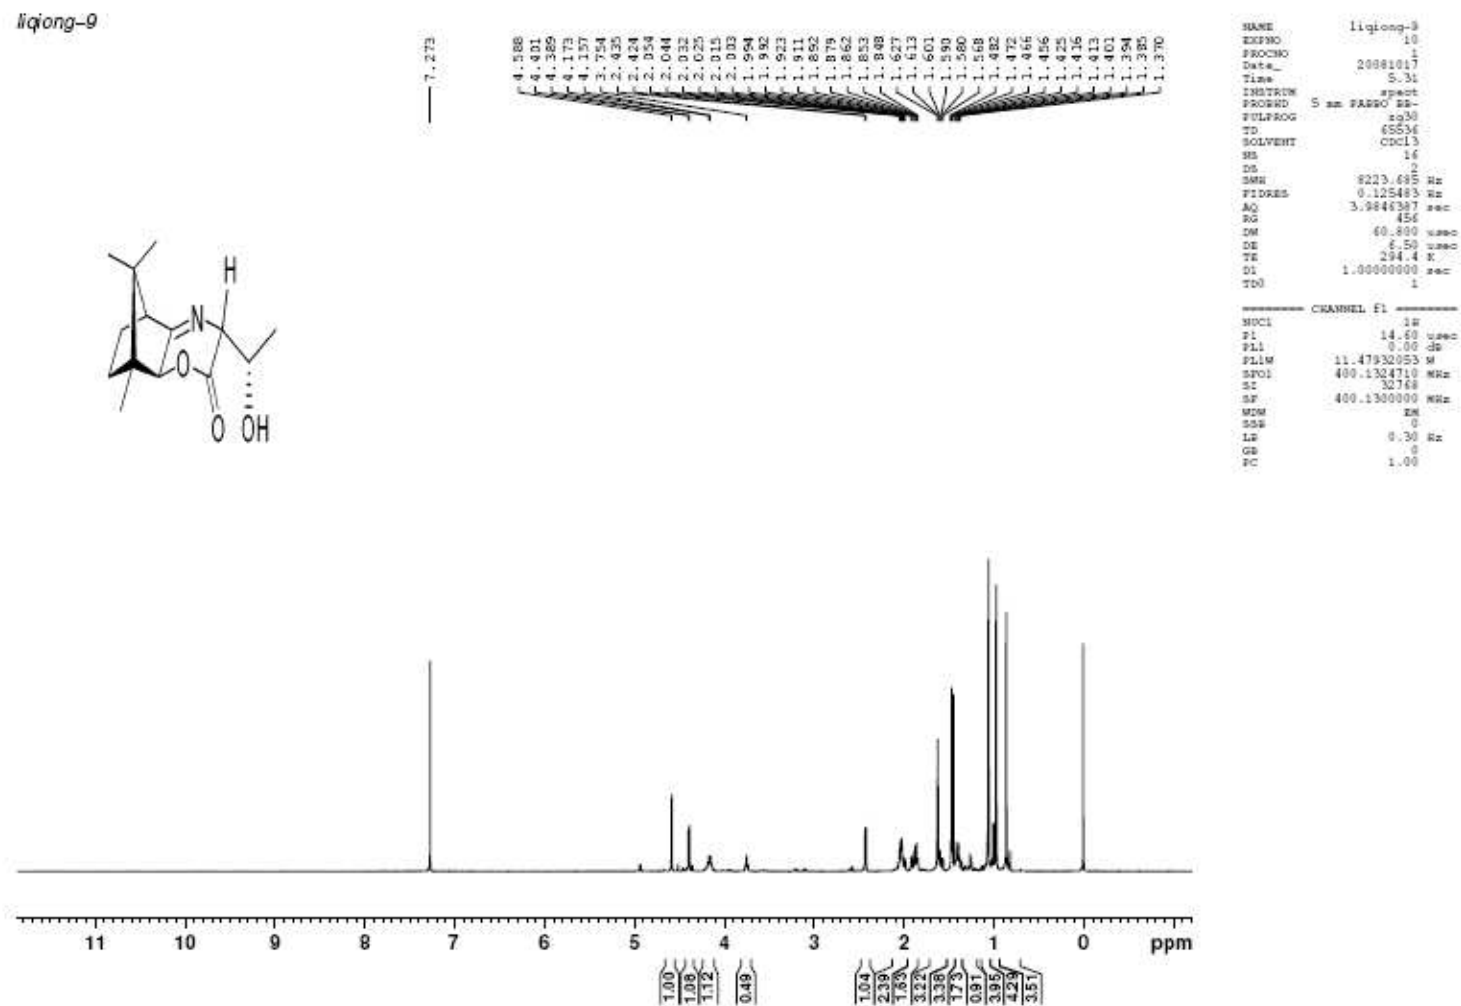

**Chemical Structure:**

**Mass Spectrum Data:**

| m/z    | Relative Intensity (%) |
|--------|------------------------|
| 181.07 | ~10                    |
| 169.18 | ~10                    |
| 82.00  | 100                    |
| 77.31  | ~10                    |
| 73.15  | ~10                    |
| 71.15  | ~10                    |
| 69.59  | ~10                    |
| 68.97  | ~10                    |
| 67.34  | ~10                    |
| 67.93  | ~10                    |
| 53.94  | ~10                    |
| 49.51  | ~10                    |
| 48.21  | ~10                    |
| 34.51  | ~10                    |
| 21.76  | ~10                    |
| 21.30  | ~10                    |
| 19.56  | ~10                    |
| 19.29  | ~10                    |
| 9.8    | ~10                    |

**Experimental Parameters:**

- NAME: liqiong-9
- EXFO: 11
- PROCNO: 1
- DATE\_: 20081017
- Time: 7.29
- INSTRUM: spect
- PROBHD: 5 mm PABBO HB-
- PULPROG: zgpg30
- TU: 85536
- SOLVENT: cpd13
- HS: 2049
- DQ: 4
- SWH: 24038.461 Hz
- FIDRES: 0.366798 Hz
- AQ: 1.3671988 sec
- RQ: 2050
- DM: 20.890 usec
- DE: 4.50 usec
- TE: 295.1 K
- D1: 2.0000000 sec
- D11: 0.0300000 sec
- TU0: 1

**Channel F1 Parameters:**

- BUC1: 13C
- P1: 9.40 usec
- PL1: -2.00 dB
- PLW: 57.32743073 W
- SFO1: 100.6229298 MHz

**Channel F2 Parameters:**

- CPDPRG2: waltz16
- BUC2: 1H
- PCPD2: 80.00 usec
- PL2: -2.00 dB
- PL12: 15.50 dB
- PL13: 15.50 dB
- PLW: 18.193498841 W
- PL12W: 0.32353121 W
- PL13W: 0.32353121 W
- SFO2: 400.1316005 MHz
- ZF: 32768
- SF: 100.6127762 MHz
- MCH: NM
- SSP: 0
- LB: 1.00 Hz
- GZ: 0
- PC: 1.40

$^1\text{H}$  NMR spectrum of compound **3b'** (400 MHz,  $\text{CDCl}_3$ )

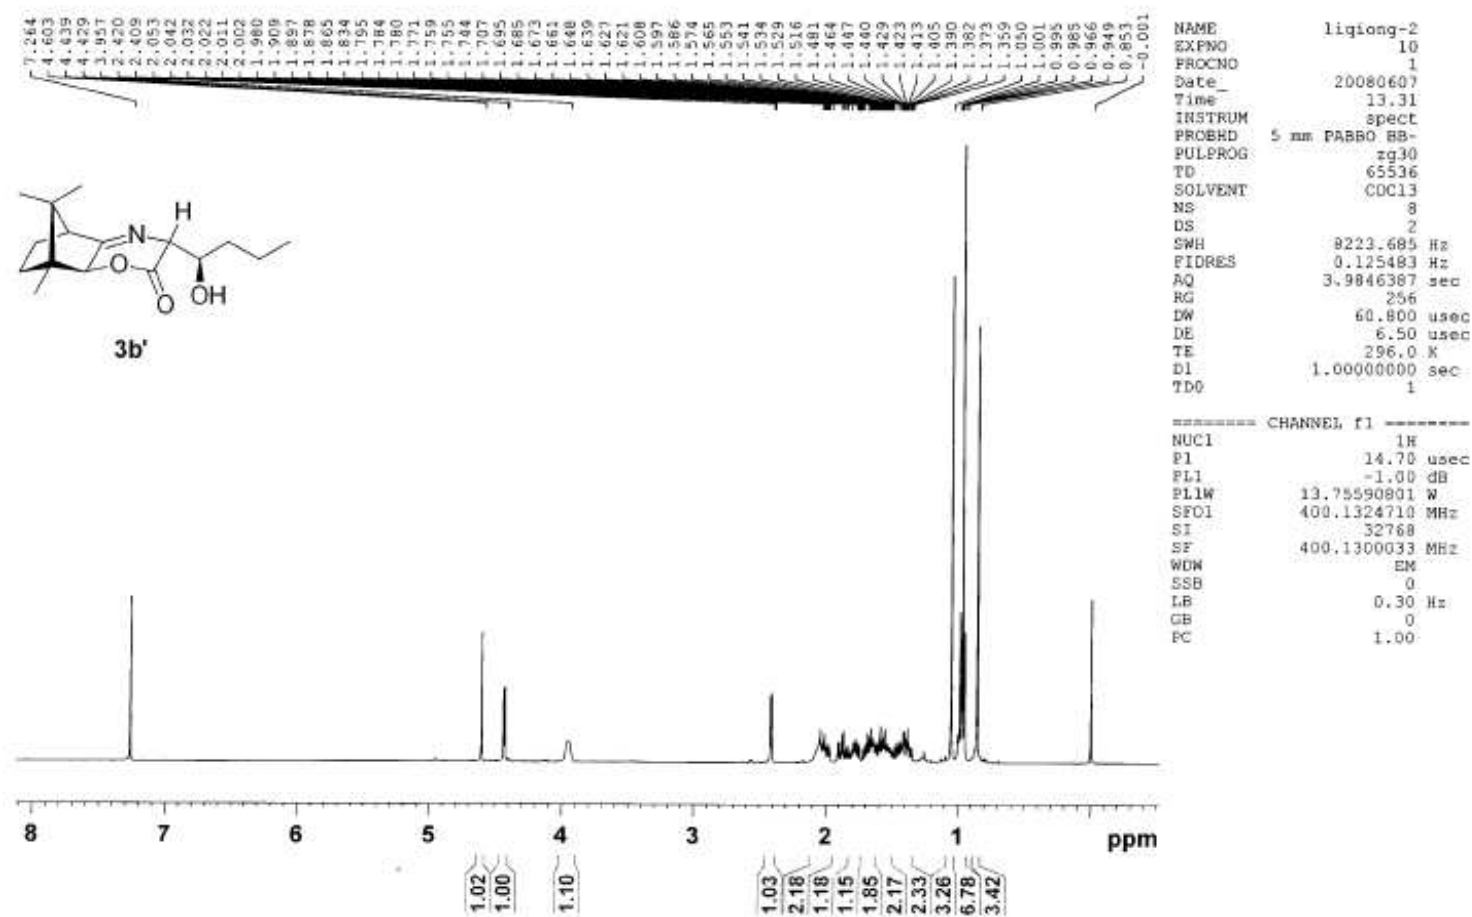

$^{13}\text{C}$  NMR spectrum of compound **3b'** (100 MHz,  $\text{CDCl}_3$ )

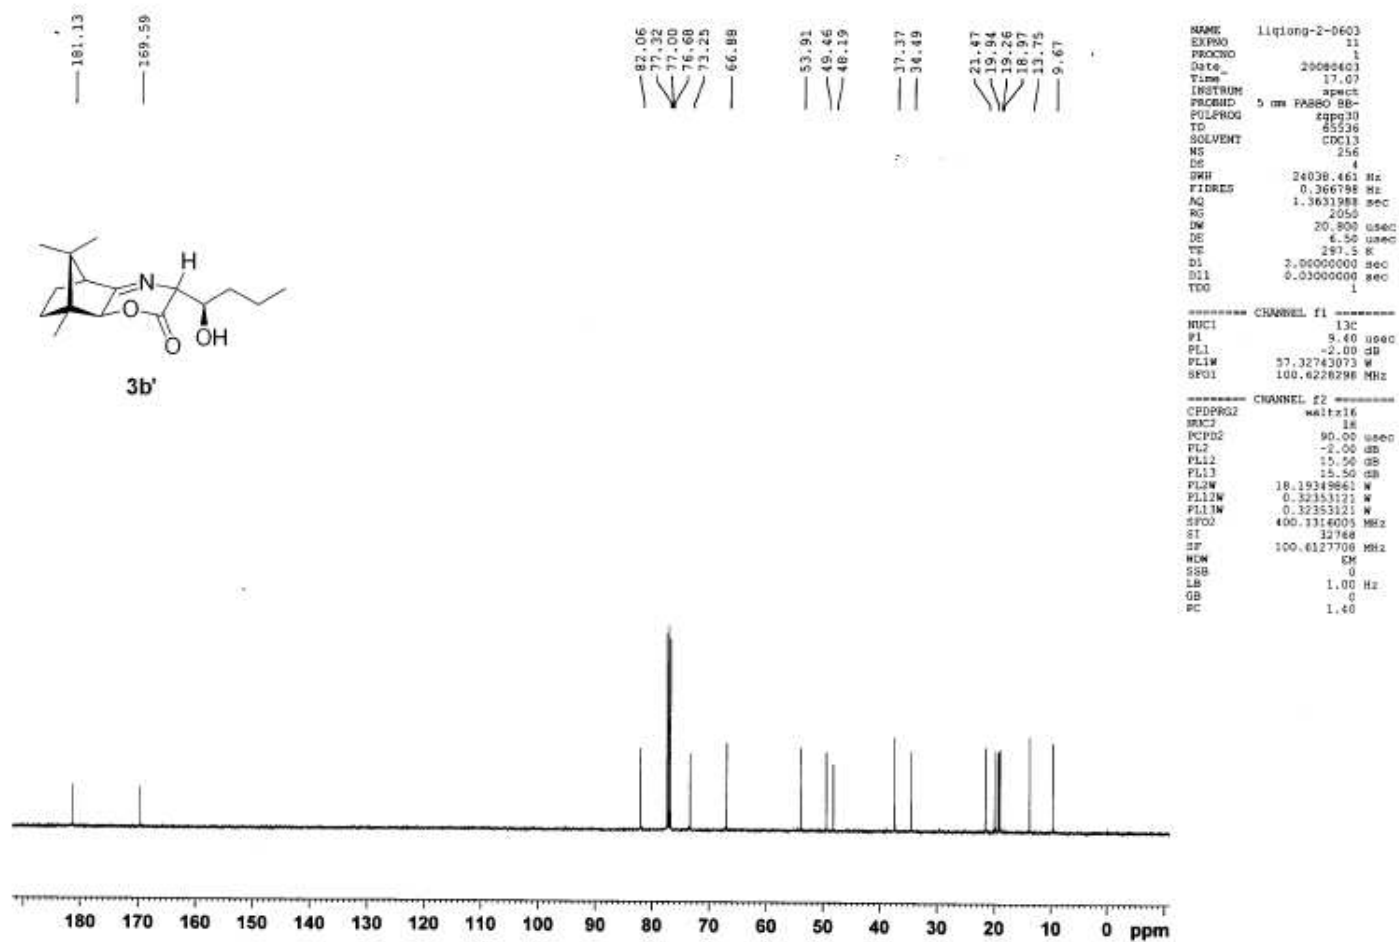

$^1\text{H}$  NMR spectrum of compound **3c'** (400 MHz,  $\text{CDCl}_3$ )

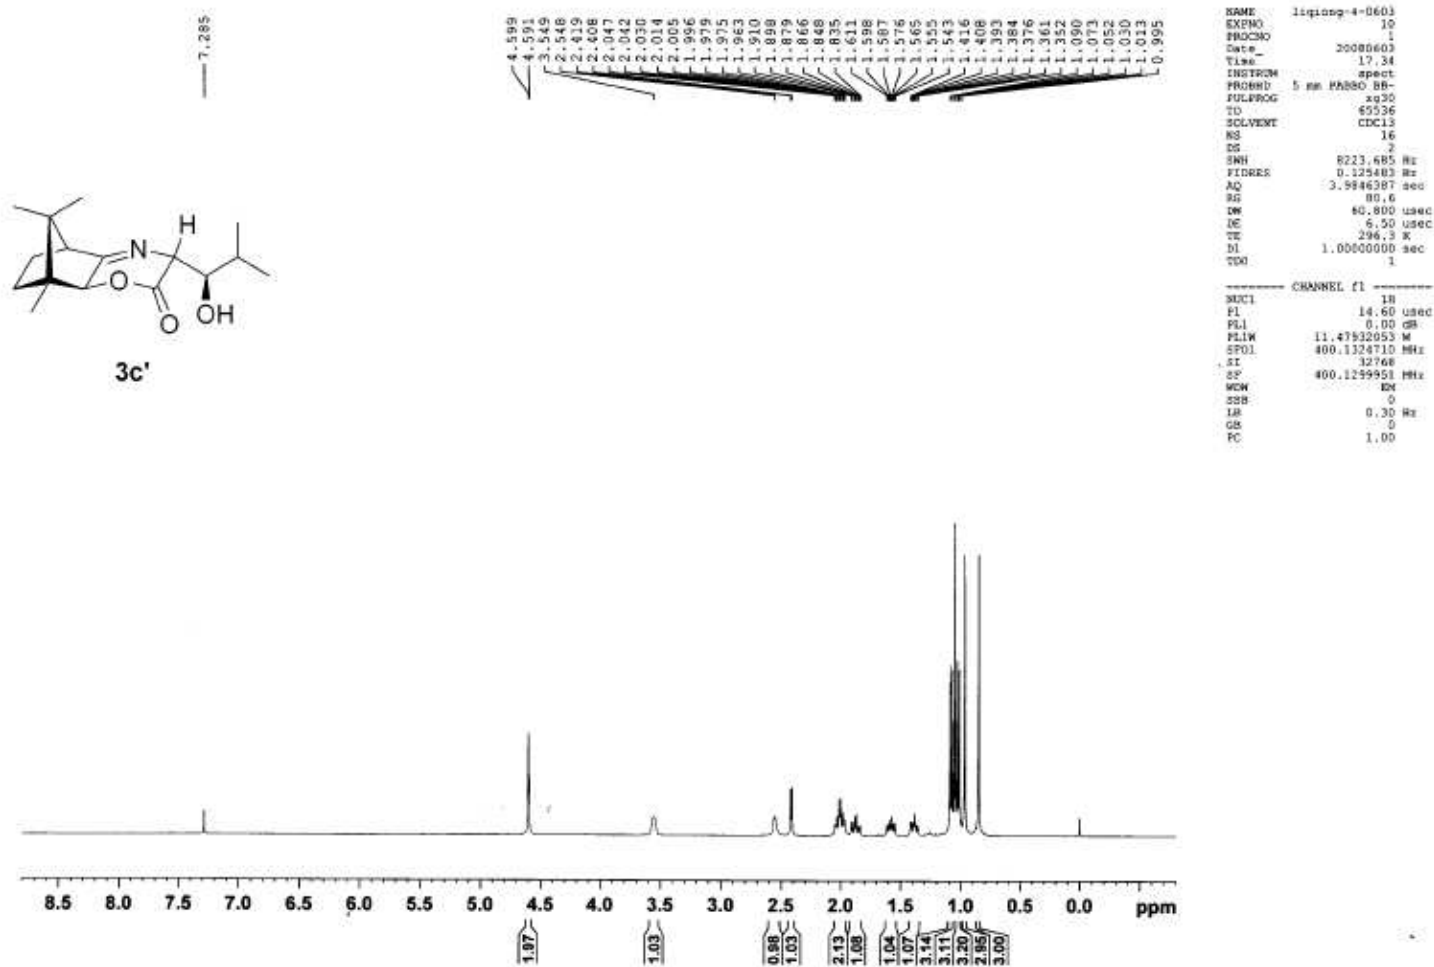

**3c'**

**<sup>1</sup>H NMR Data (CDCl<sub>3</sub>):**

| Chemical Shift (ppm) | Integration |
|----------------------|-------------|
| 181.02               | —           |
| 169.79               | —           |
| 81.93                | —           |
| 78.68                | —           |
| 77.22                | —           |
| 77.00                | —           |
| 76.68                | —           |
| 66.74                | —           |
| 53.87                | —           |
| 49.47                | —           |
| 48.15                | —           |
| 34.44                | —           |
| 31.54                | —           |
| 21.41                | —           |
| 19.91                | —           |
| 19.51                | —           |
| 19.25                | —           |
| 17.55                | —           |
| 9.68                 | —           |

**Mass Spectrometry Data:**

| Parameter | Value          |
|-----------|----------------|
| NAME      | liqiong-4-0603 |
| GENO      | 11             |
| PROCNO    | 1              |
| Date      | 20080603       |
| Time      | 17.51          |
| INSTRUM   | spect          |
| PROBHD    | 5 mm PABBO BB- |
| PULPROG   | zgpg30         |
| TD        | 65536          |
| SOLVENT   | CDCl3          |
| RG        | 256            |
| DS        | 4              |
| SWH       | 24036.461 Hz   |
| FIDRES    | 0.366798 Hz    |
| AQ        | 1.363198 sec   |
| RG        | 1820           |
| DW        | 20.800 usec    |
| DE        | 6.50 usec      |
| TE        | 297.1 K        |
| D1        | 2.00000000 sec |
| D11       | 0.03000000 sec |
| TD0       | 1              |

**Channel 1 (13C):**

| Parameter | Value           |
|-----------|-----------------|
| MUC1      | 13C             |
| F1        | 9.40 usec       |
| PL1       | -1.00 dB        |
| PL1W      | 57.32743011 W   |
| SFO1      | 100.6228258 MHz |

**Channel 2 (1H):**

| Parameter | Value           |
|-----------|-----------------|
| PCPD02    | wd1214          |
| MUC2      | 1H              |
| PCPD2     | 90.00 usec      |
| PL2       | -1.00 dB        |
| PL12      | 15.56 dB        |
| PL13      | 15.56 dB        |
| PL2W      | 18.19349861 W   |
| PL12W     | 0.32353121 W    |
| PL13W     | 0.32353121 W    |
| SFO2      | 400.1316005 MHz |
| S1        | 32768           |
| SF        | 100.6127722 MHz |
| WDW       | EM              |
| SSB       | 0               |
| LB        | 1.00 Hz         |
| GB        | 0               |
| PC        | 1.40            |

$^1\text{H}$  NMR spectrum of compound **3d'** (400 MHz,  $\text{CDCl}_3$ )

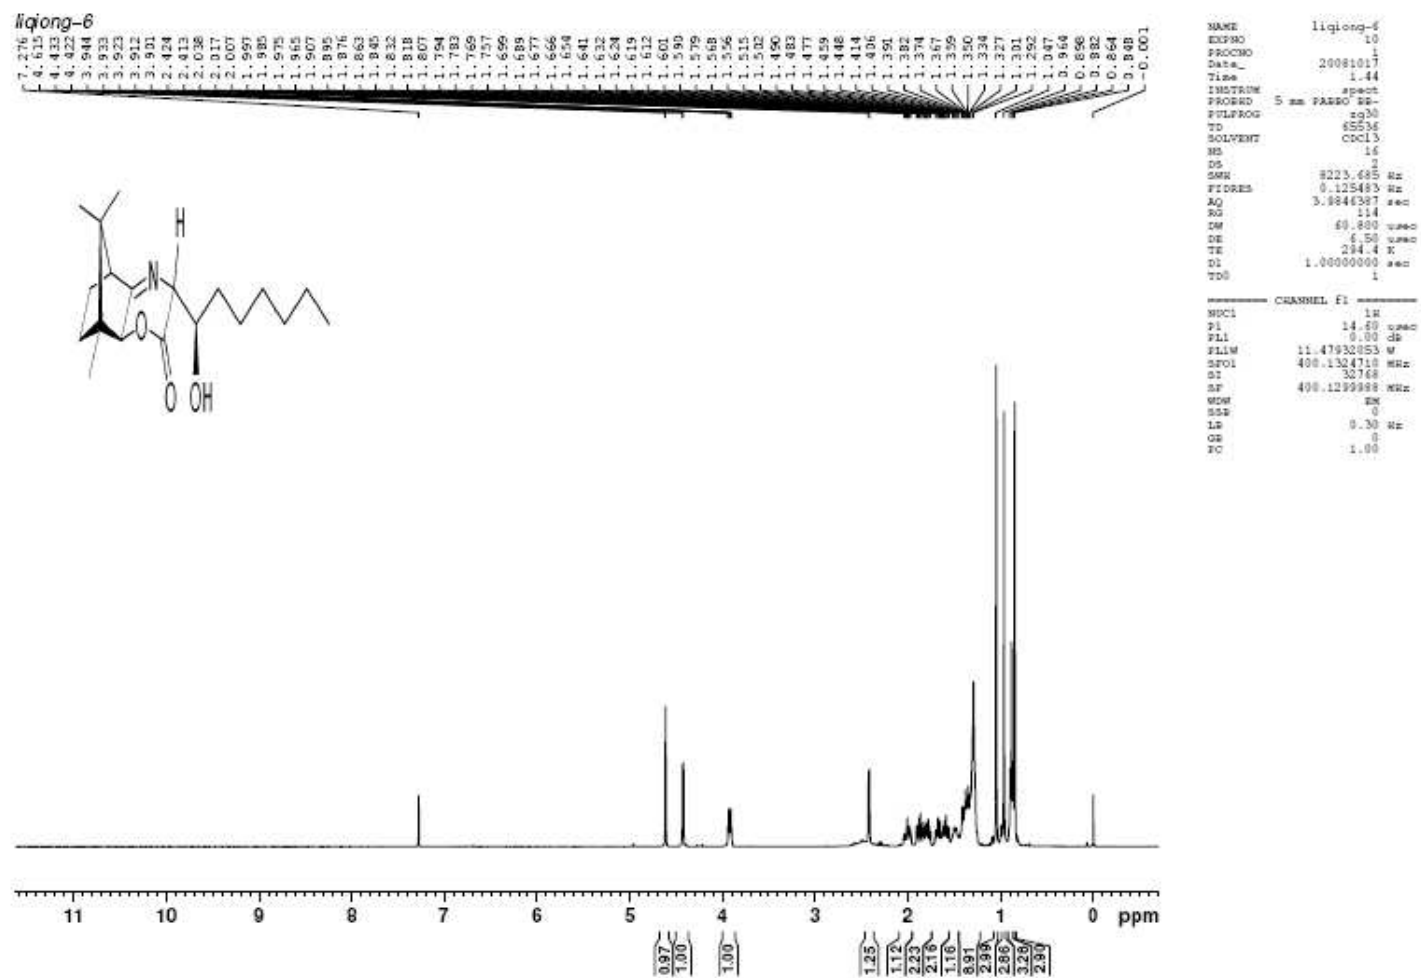



$^{13}\text{C}$  NMR spectrum of compound **3d'** (100 MHz,  $\text{CDCl}_3$ )

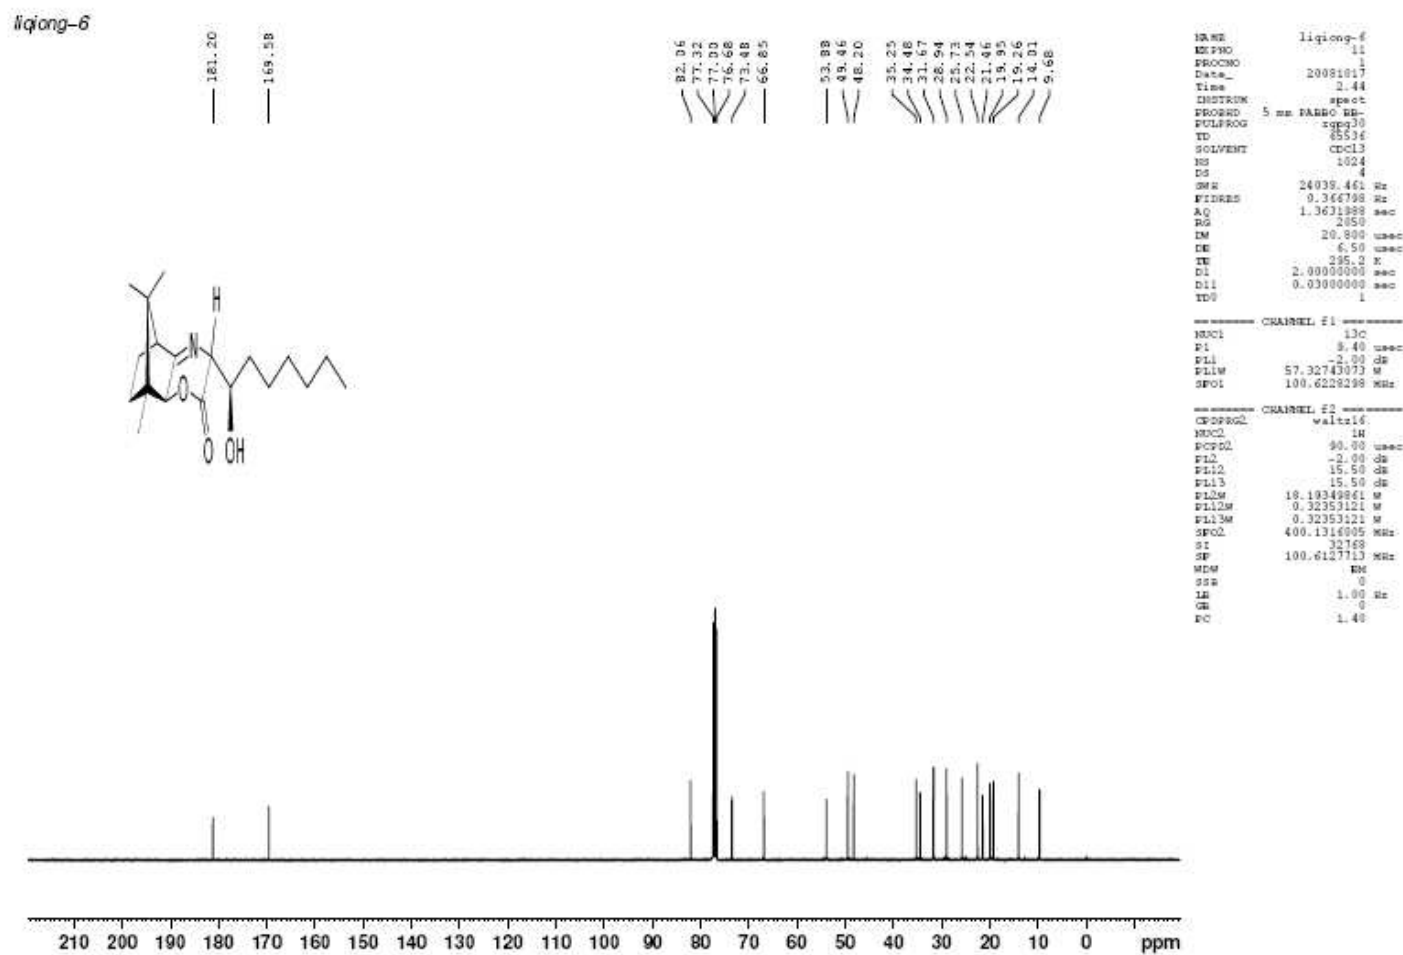

$^1\text{H}$  NMR spectrum of compound **3e'** (300 MHz,  $\text{CDCl}_3$ )

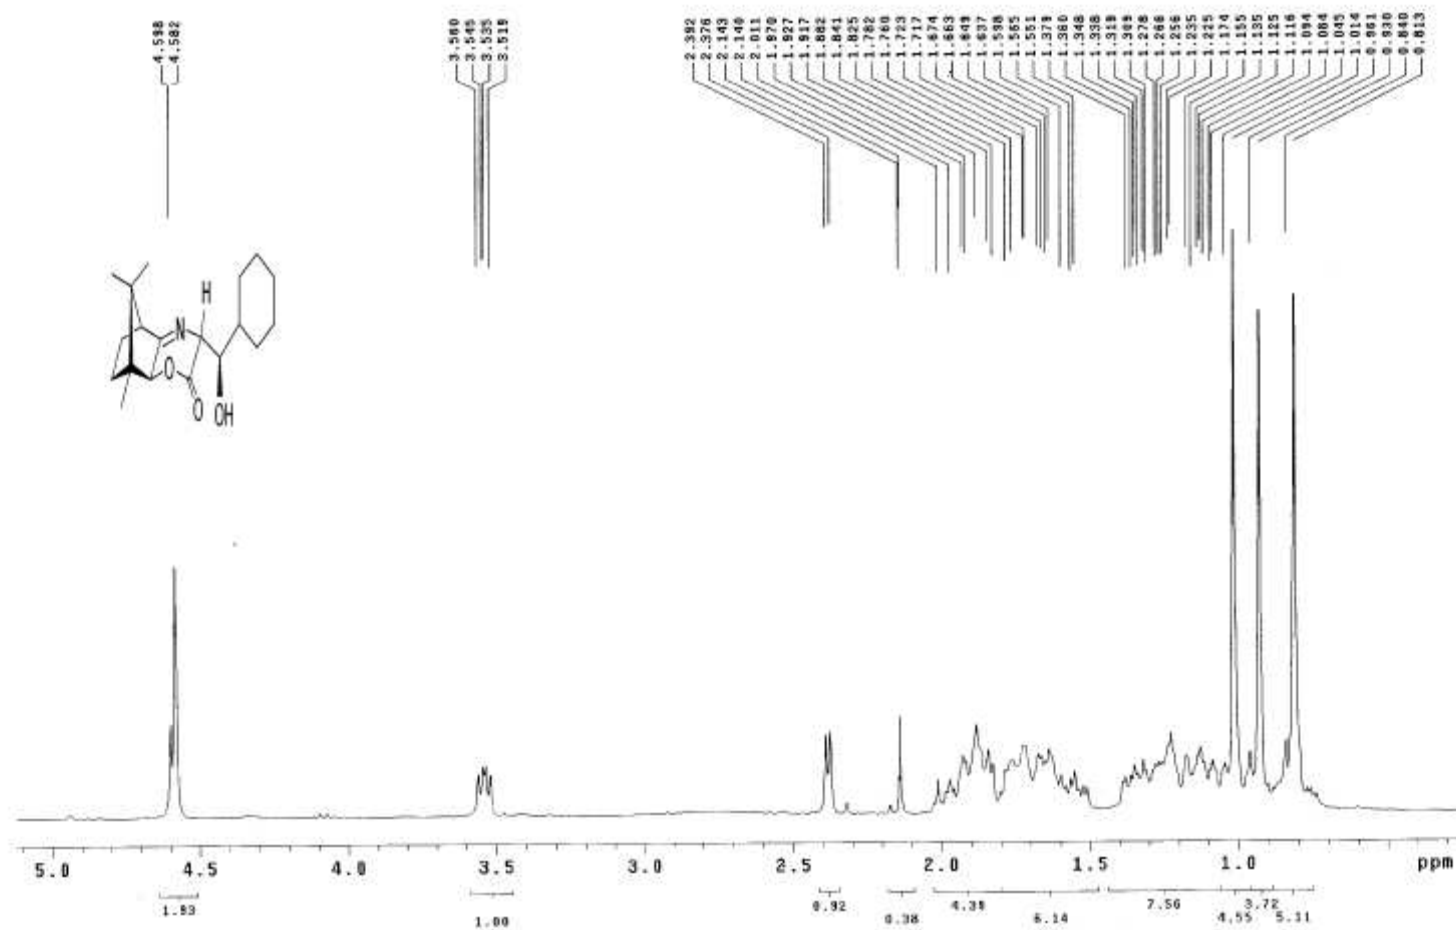

$^{13}\text{C}$  NMR spectrum of compound **3e'** (75 MHz,  $\text{CDCl}_3$ )

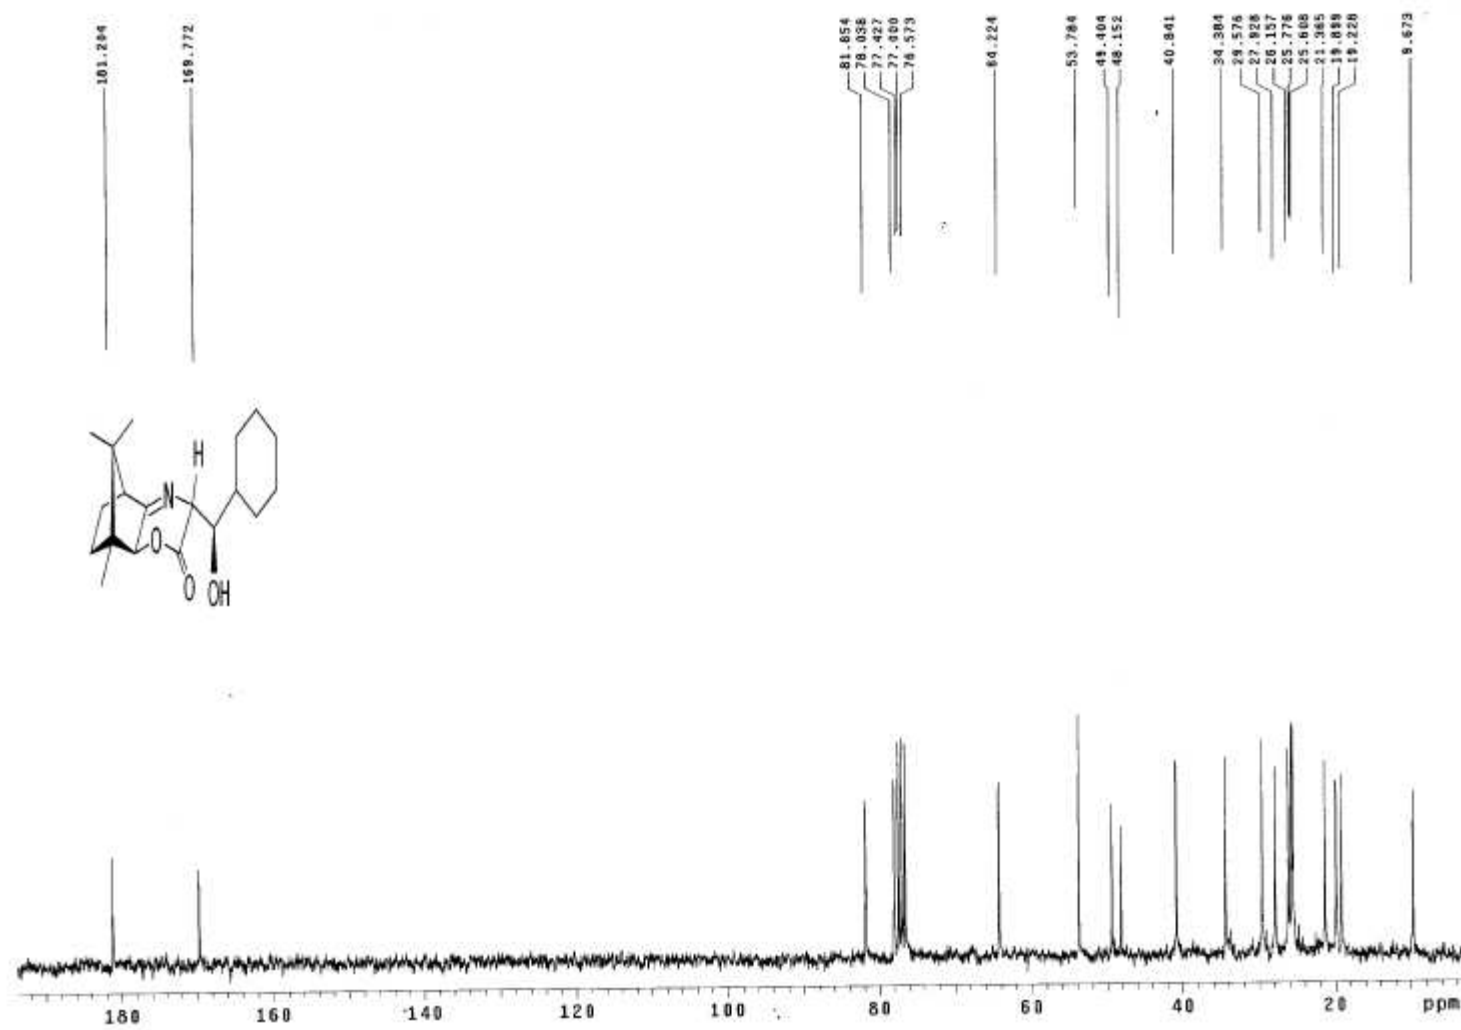

<sup>1</sup>H NMR spectrum of compound **3f** (400 MHz, CDCl<sub>3</sub>)

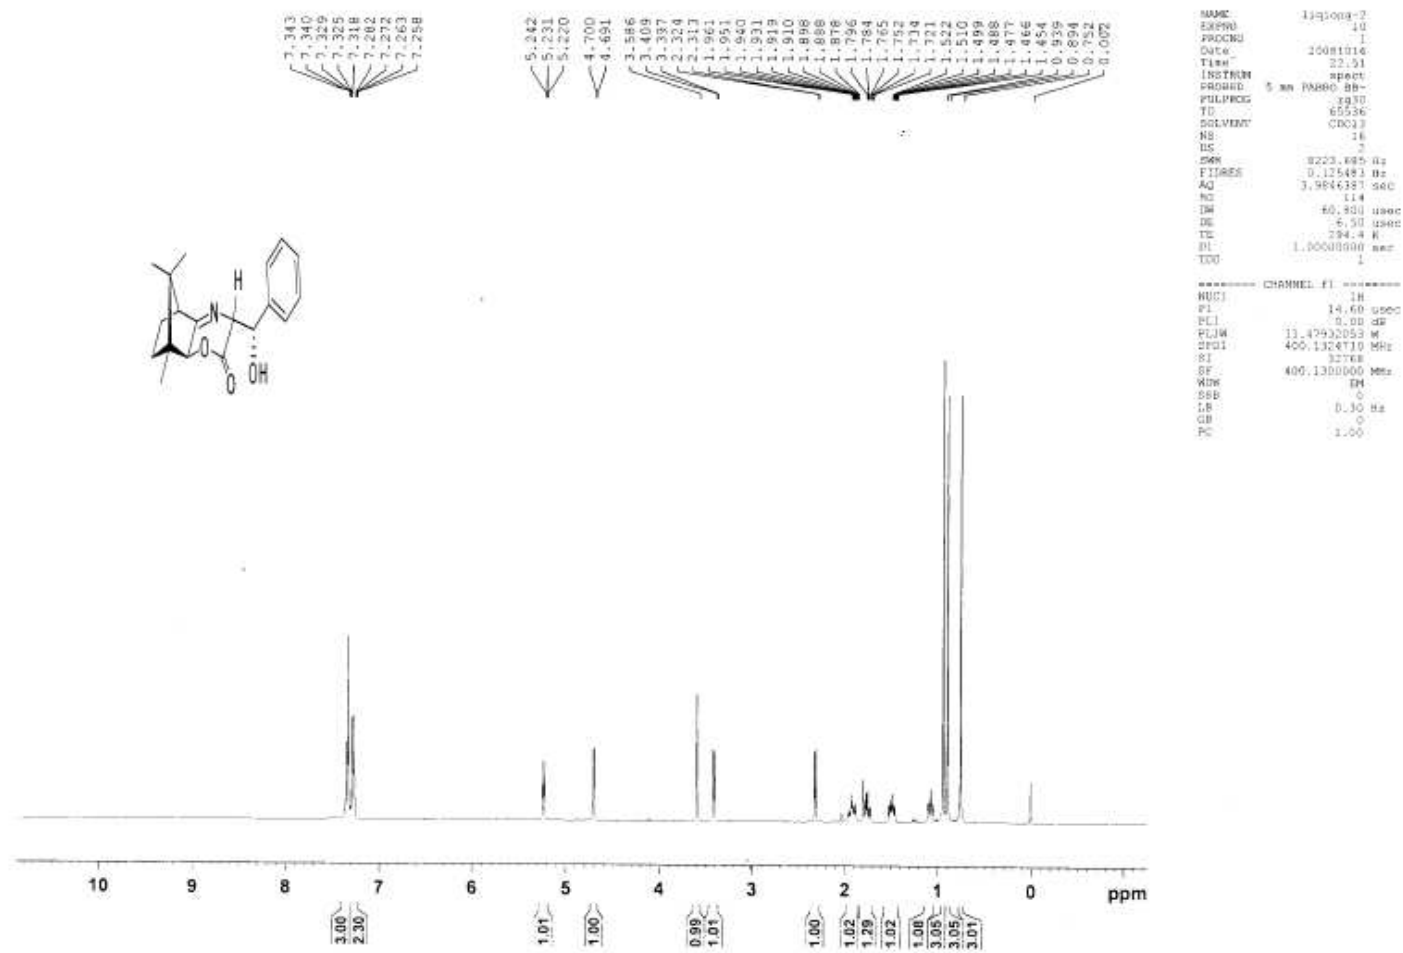

$^{13}\text{C}$  NMR spectrum of compound **3f** (100 MHz,  $\text{CDCl}_3$ )

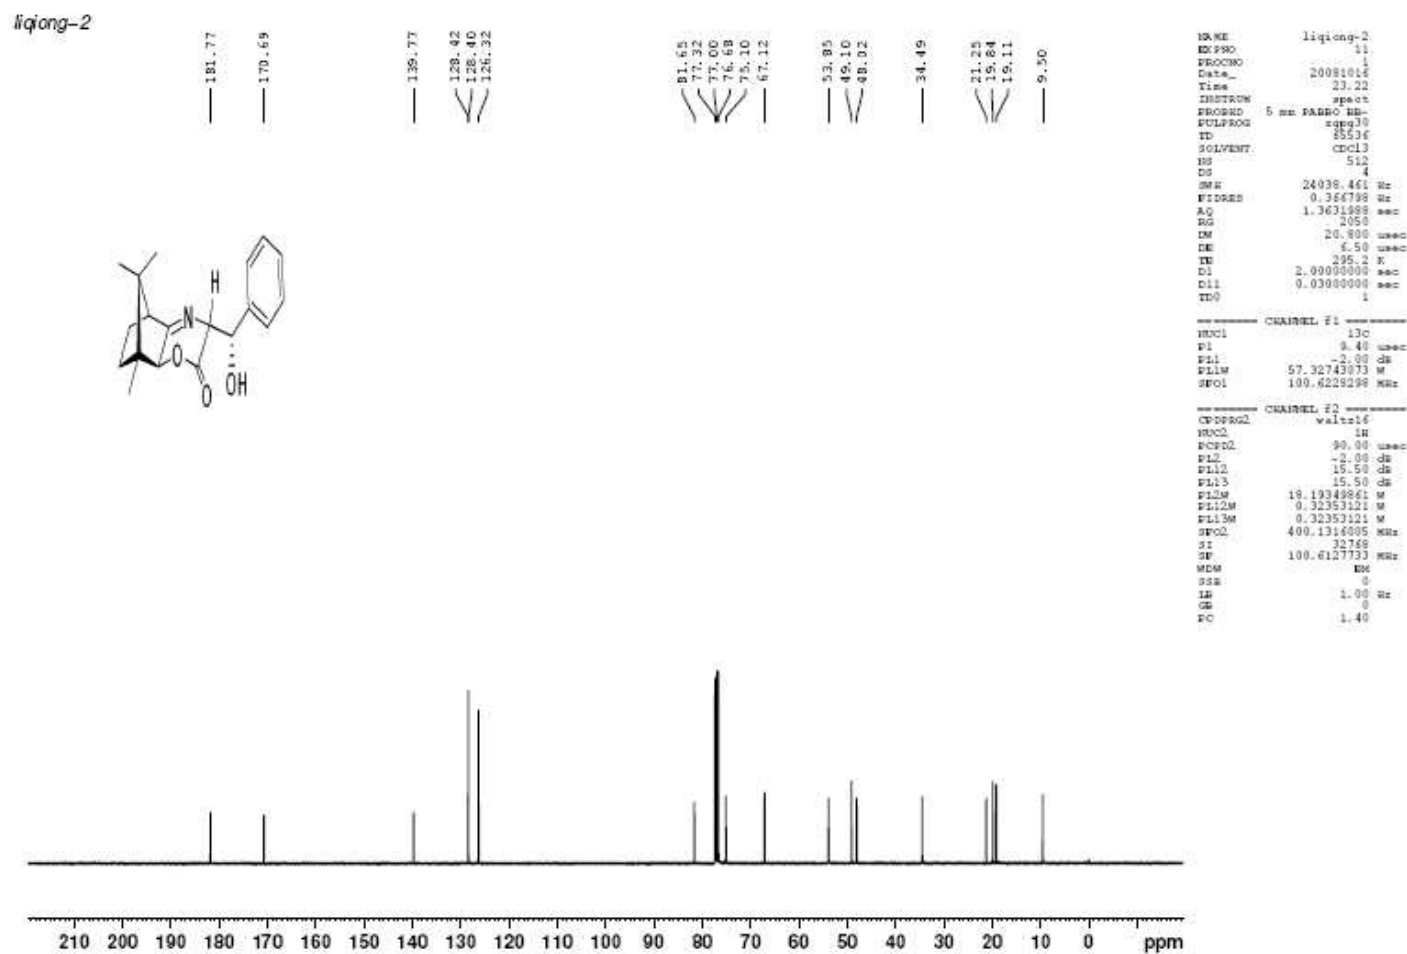

$^1\text{H}$  NMR spectrum of compound **3g** (400 MHz,  $\text{CDCl}_3$ )

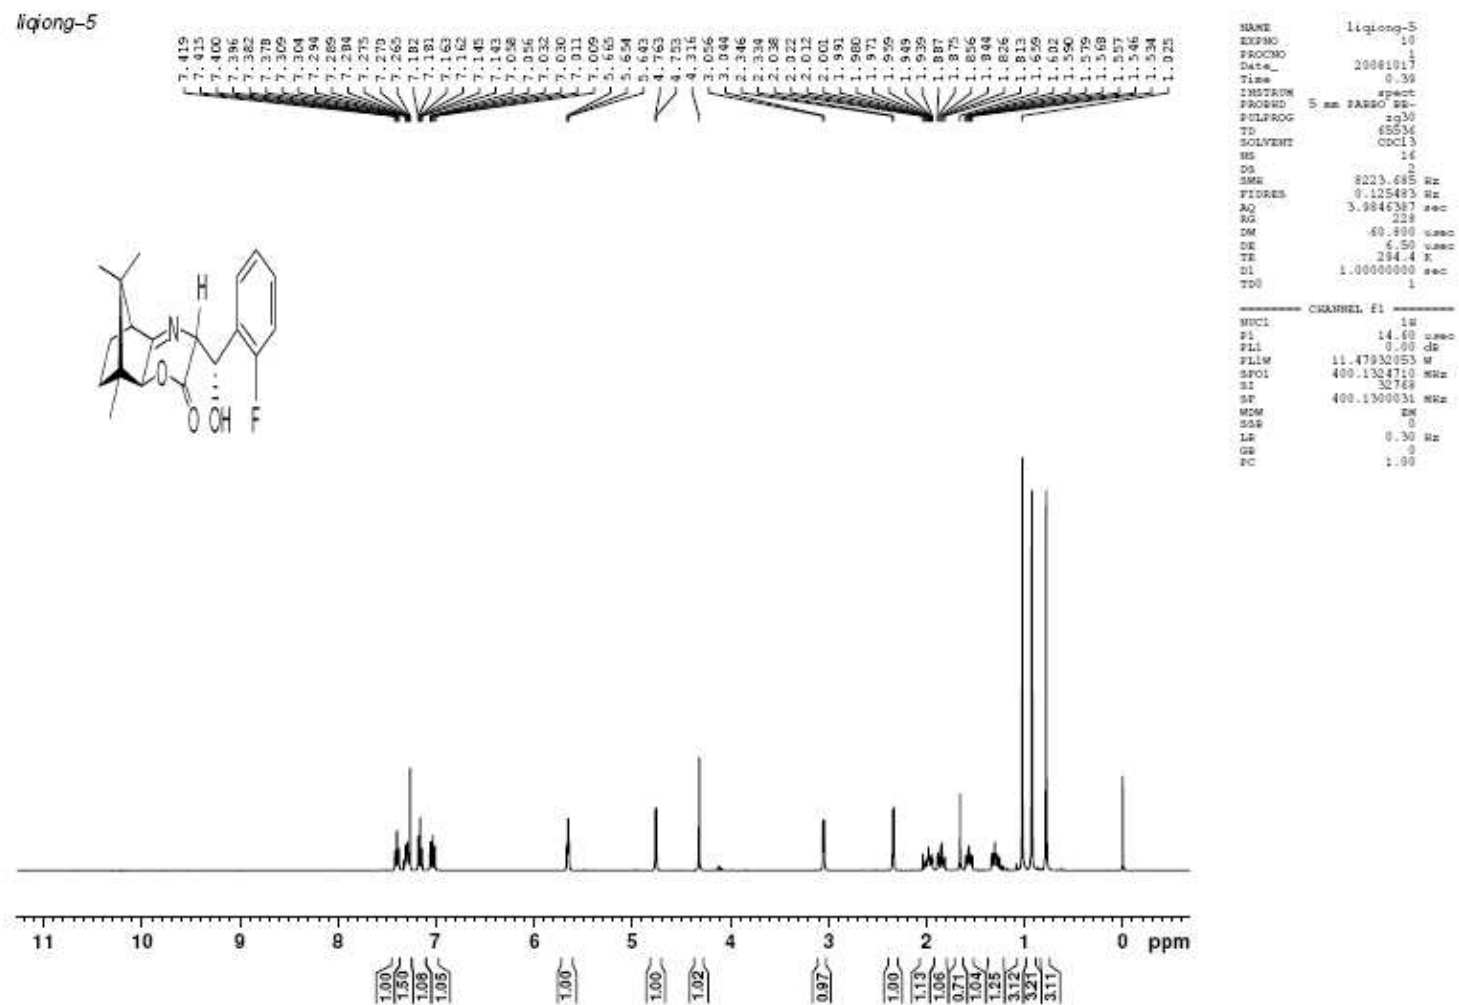

$^{13}\text{C}$  NMR spectrum of compound **3g** (100 MHz,  $\text{CDCl}_3$ )

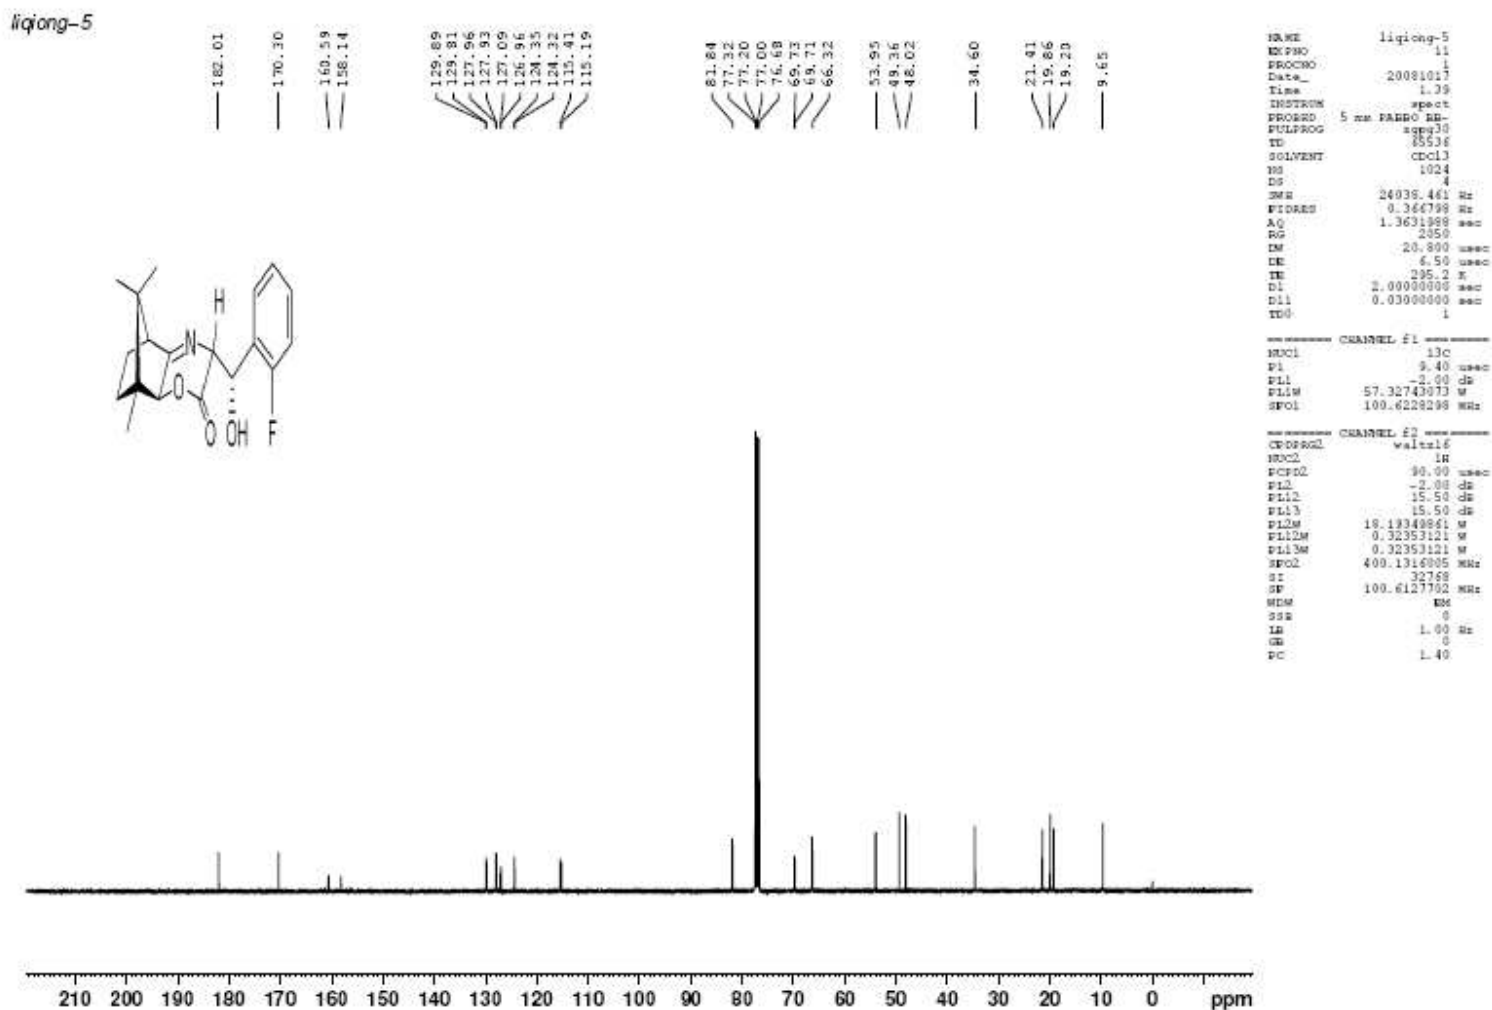

$^1\text{H}$  NMR spectrum of compound **3h** (400 MHz,  $\text{CDCl}_3$ )

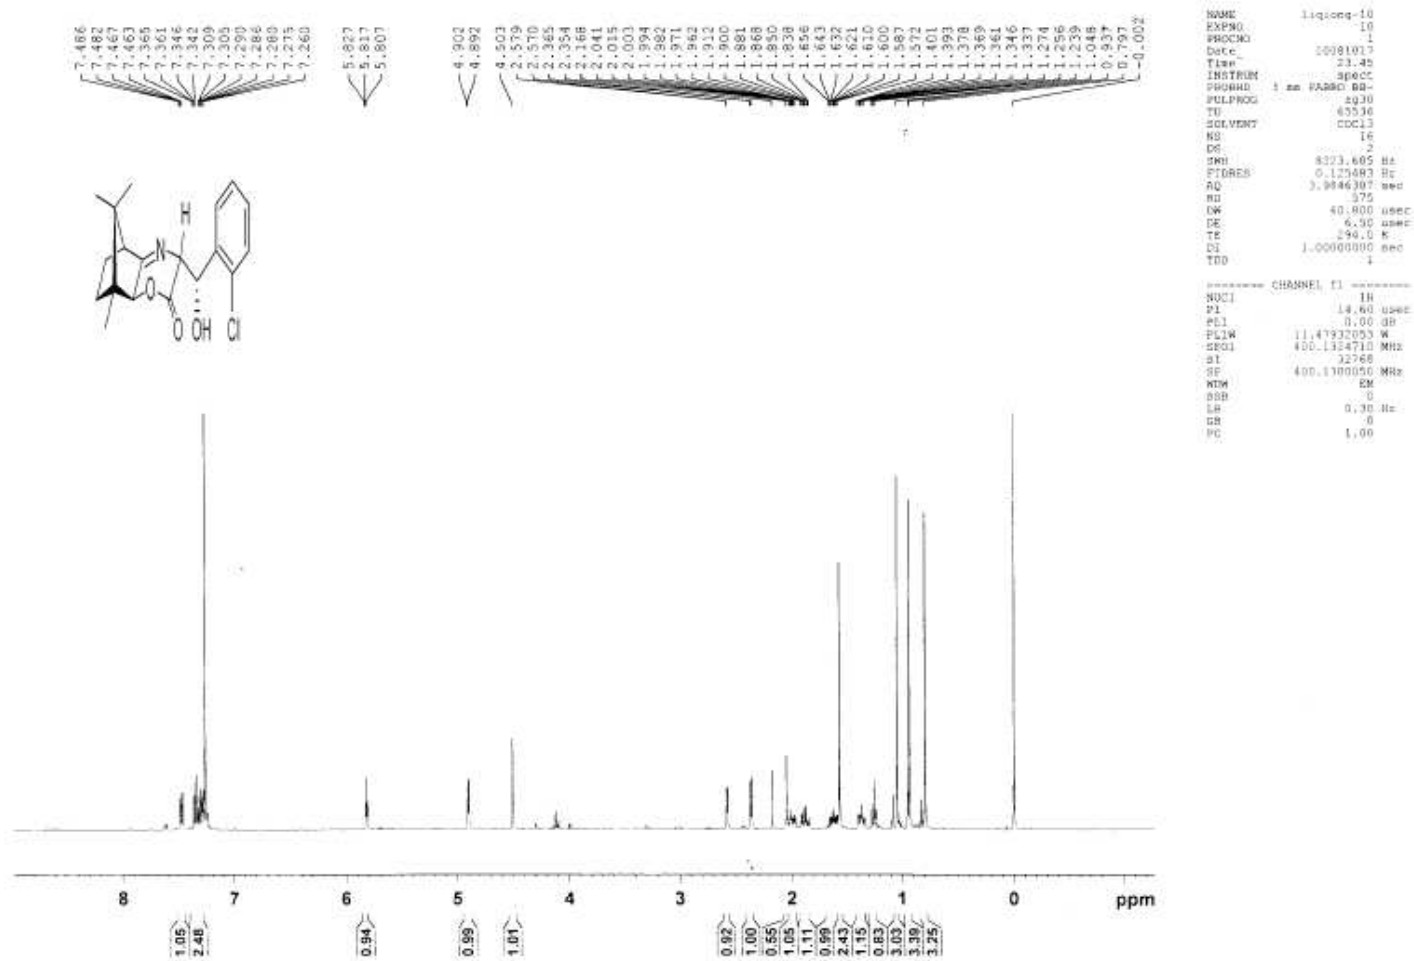



$^{13}\text{C}$  NMR spectrum of compound **3h** (100 MHz,  $\text{CDCl}_3$ )

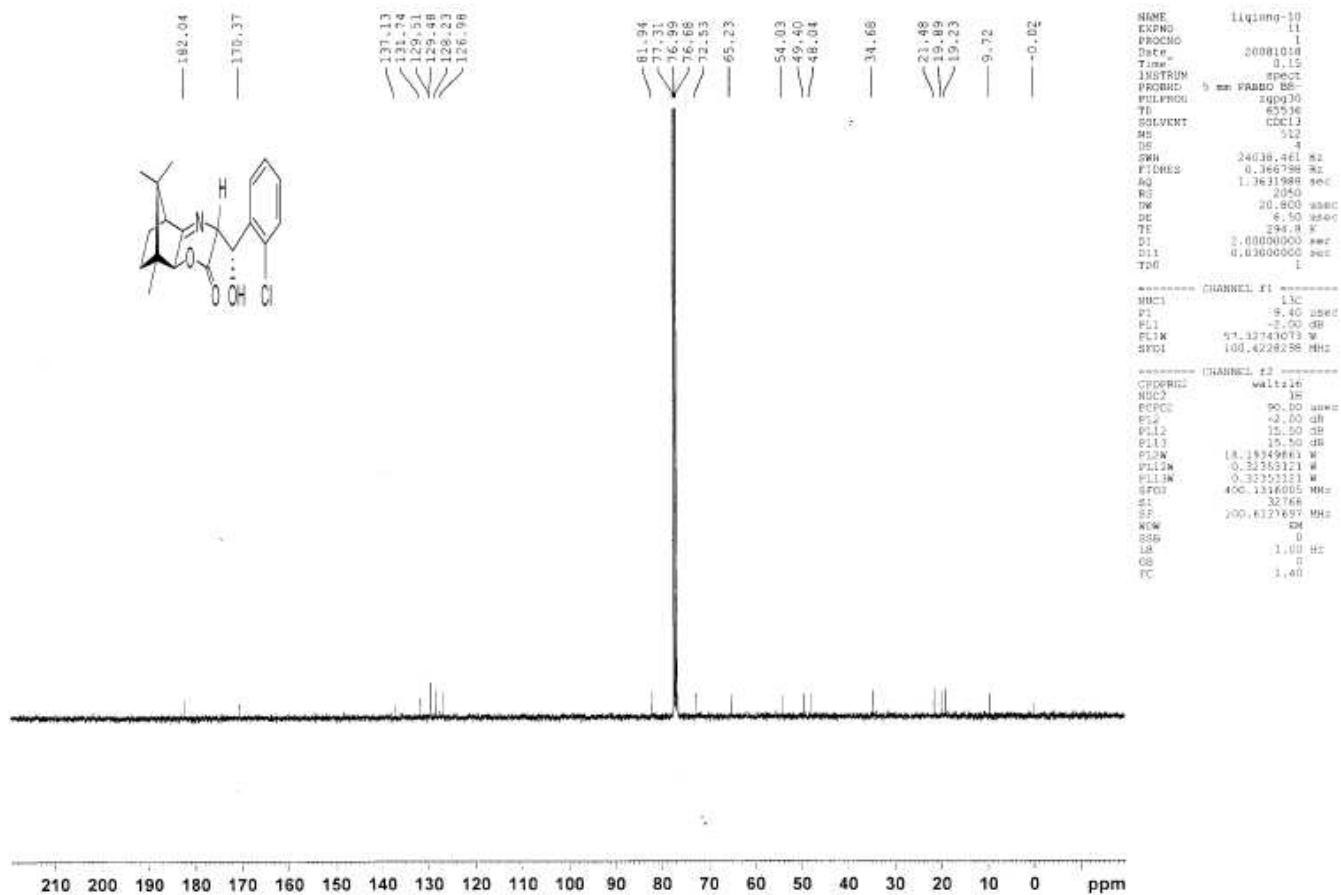

$^1\text{H}$  NMR spectrum of compound **4a** (400 MHz,  $\text{D}_2\text{O}$ )

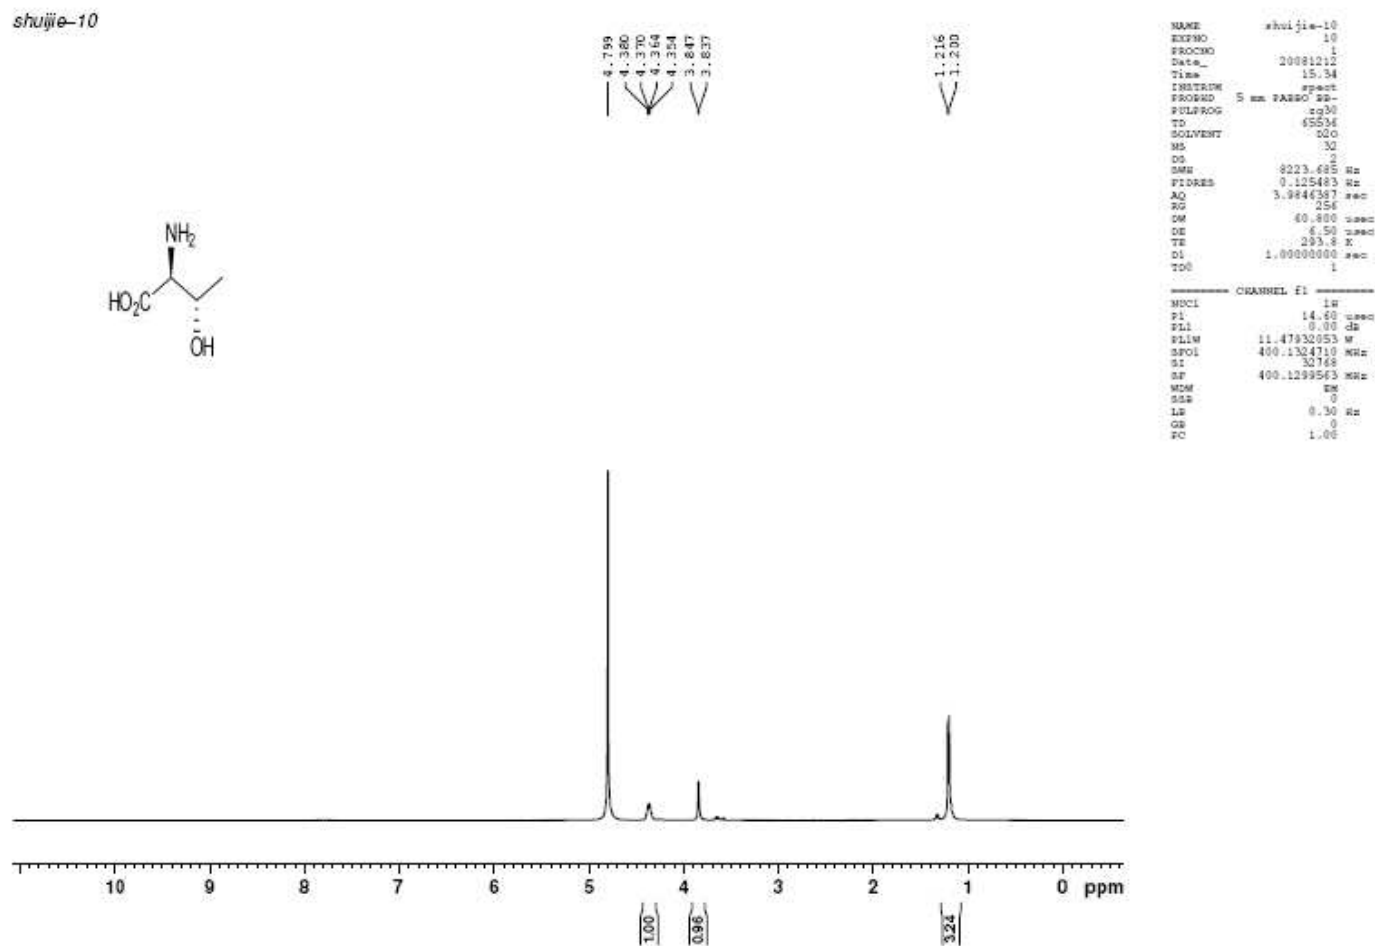

$^{13}\text{C}$  NMR spectrum of compound **4a** (100 MHz,  $\text{D}_2\text{O}$ )

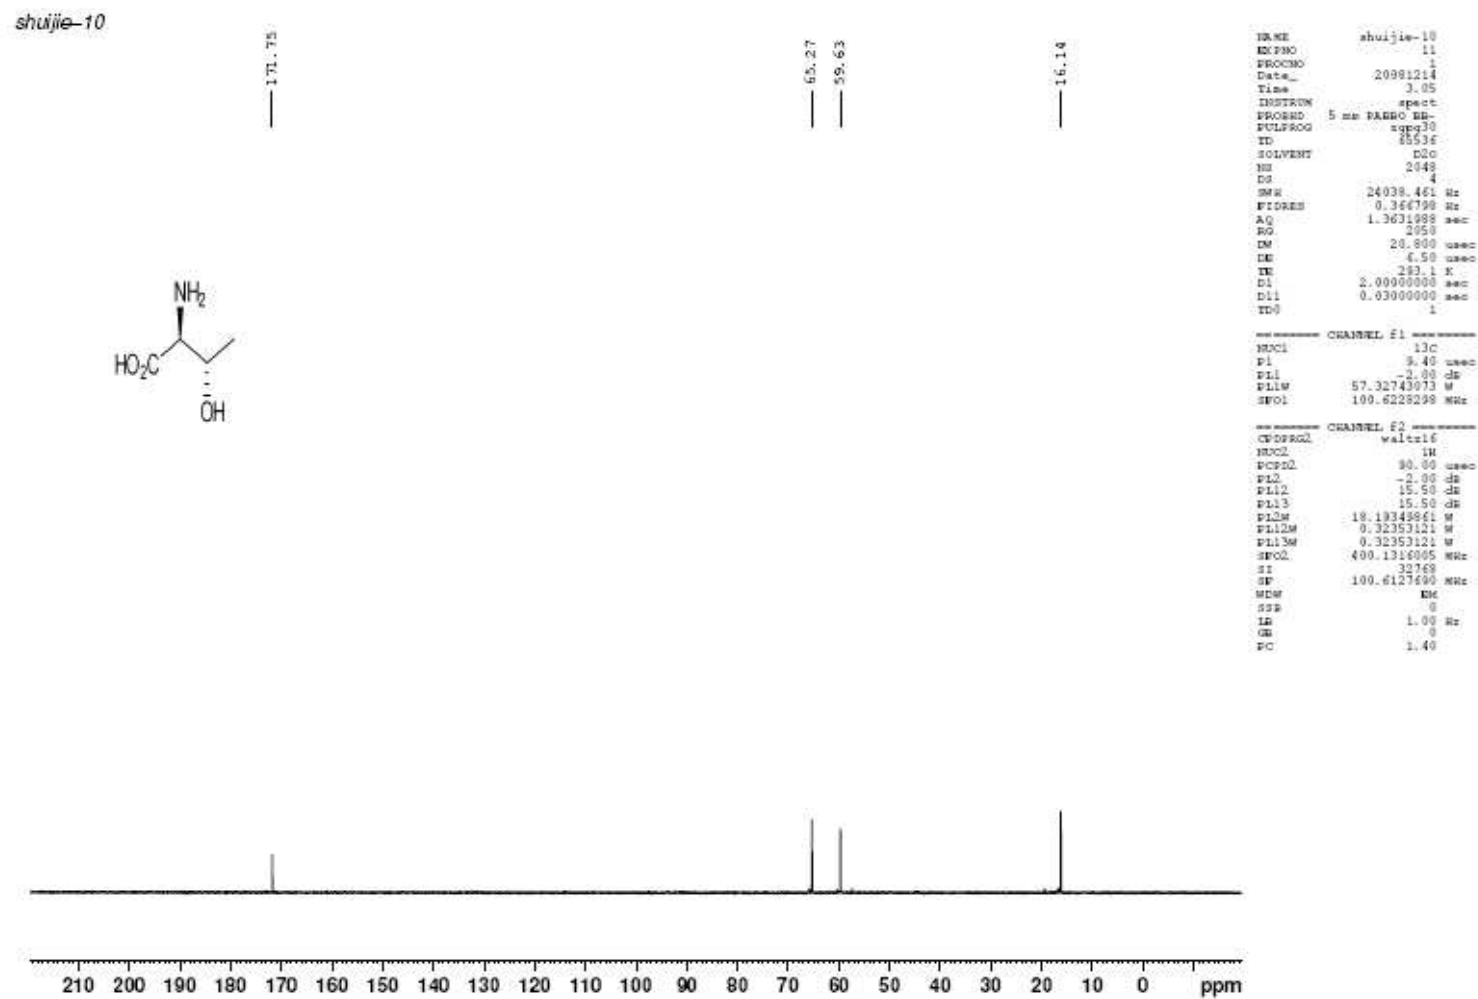

$^1\text{H}$  NMR spectrum of compound **4c** (400 MHz,  $\text{D}_2\text{O}$ )

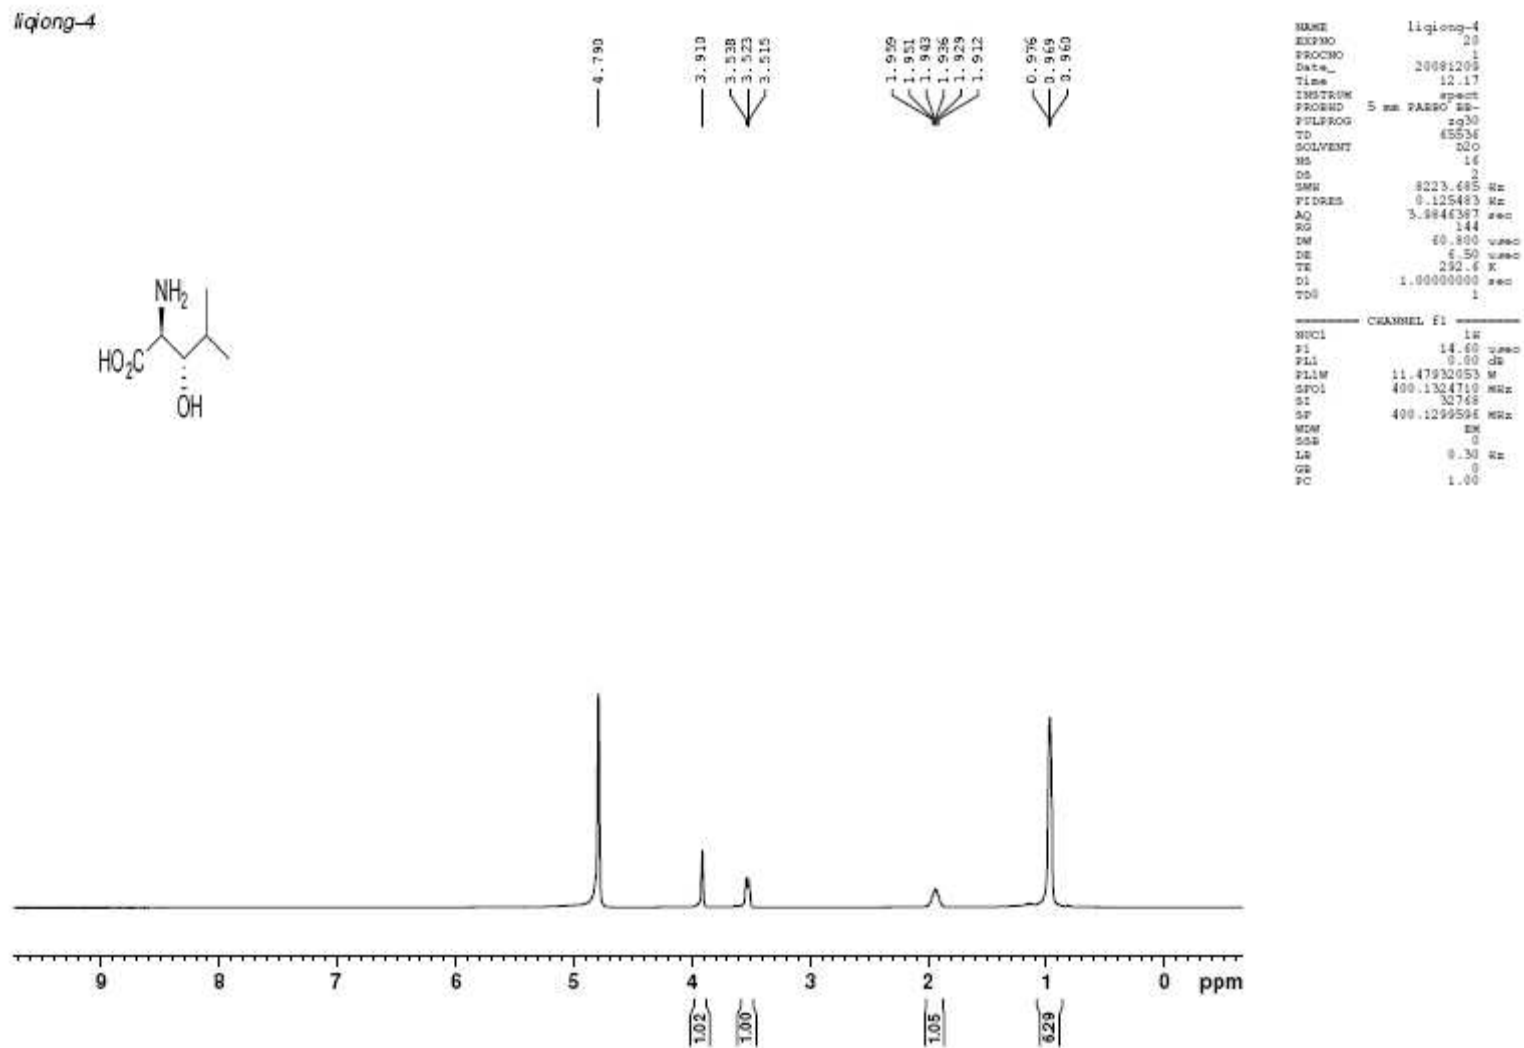

$^{13}\text{C}$  NMR spectrum of compound **4c** (100 MHz,  $\text{D}_2\text{O}$ )

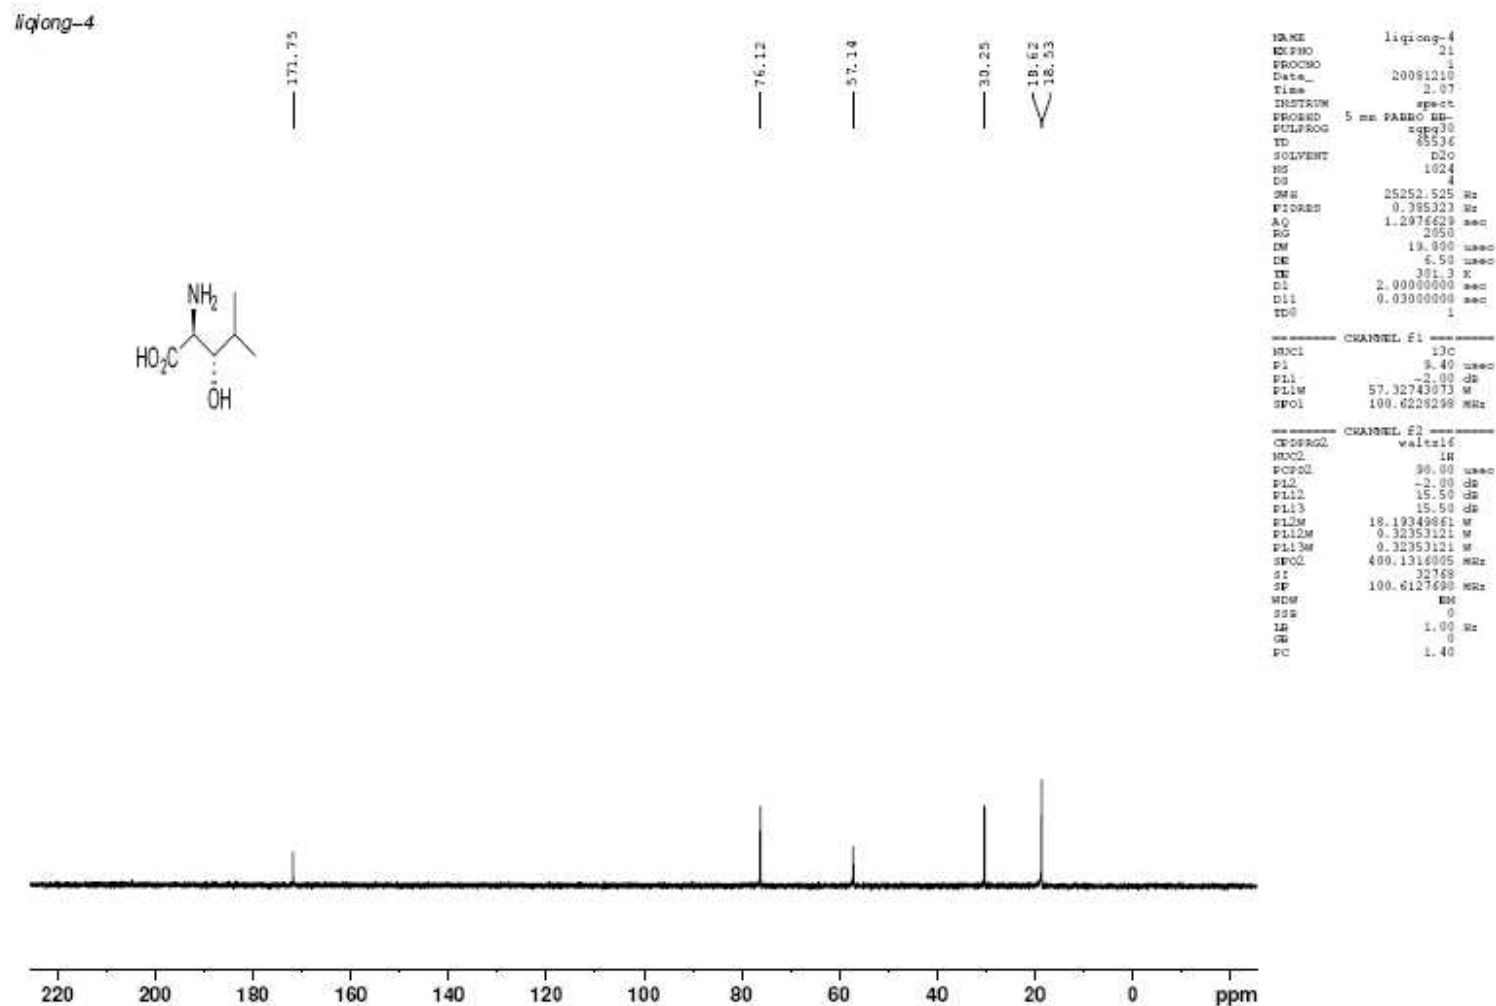

$^1\text{H}$  NMR spectrum of compound **4d** (400 MHz,  $\text{D}_2\text{O}$ )

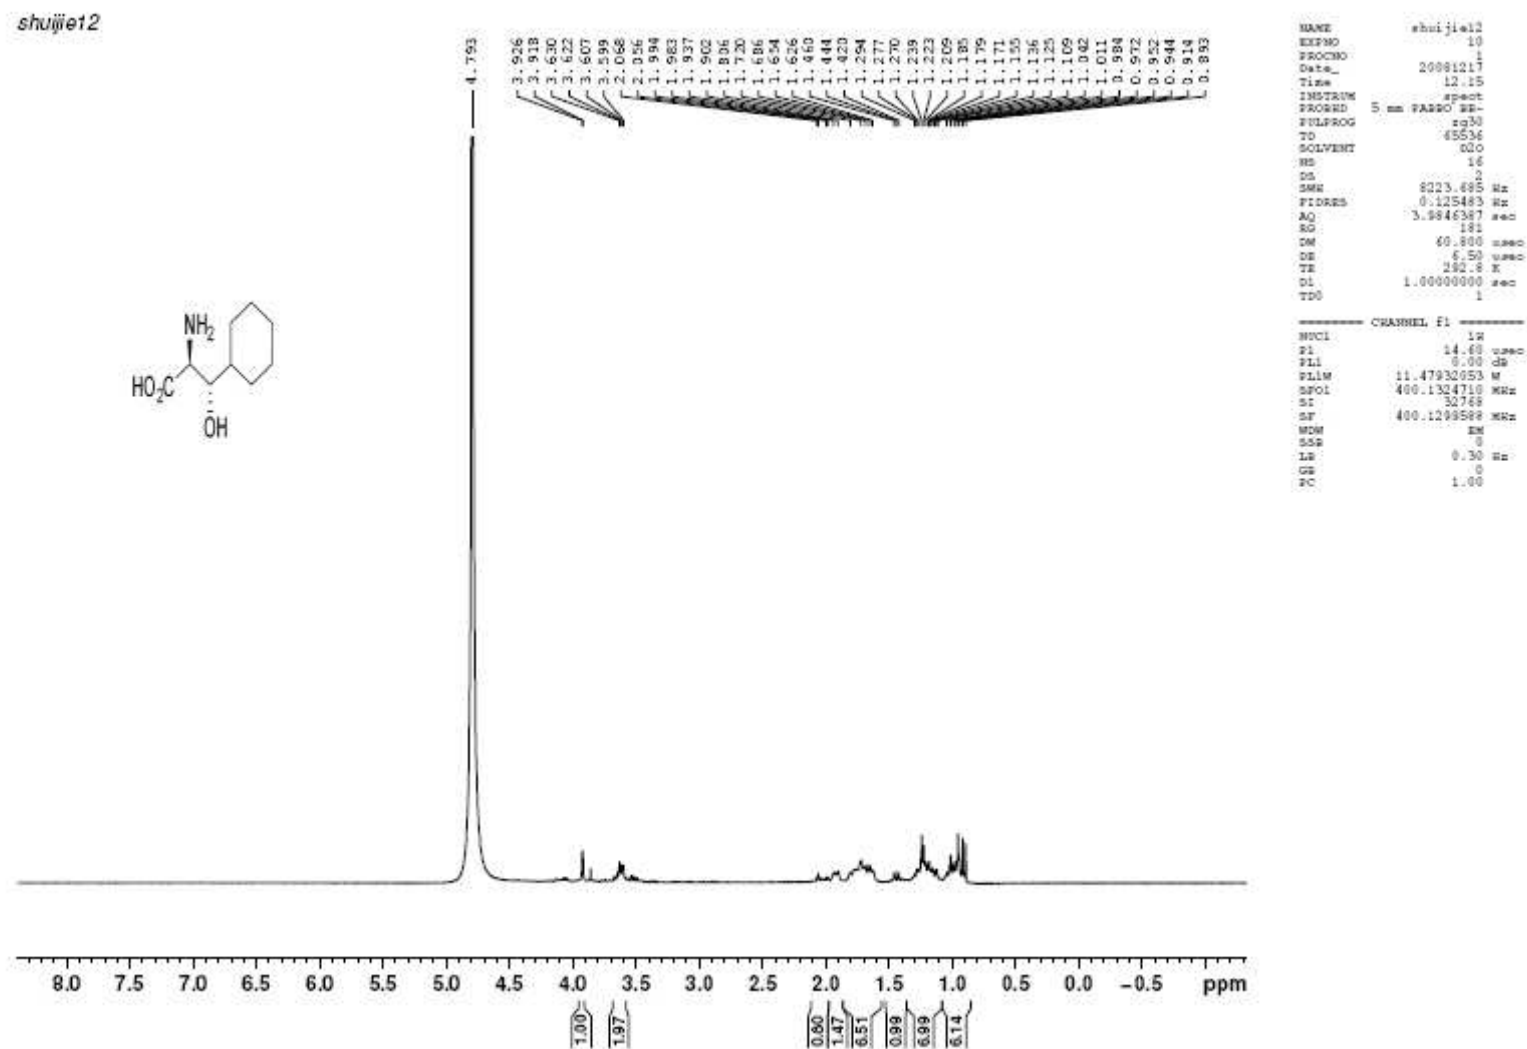

$^1\text{H}$  NMR spectrum of compound **4e** (400 MHz,  $\text{D}_2\text{O}$ )

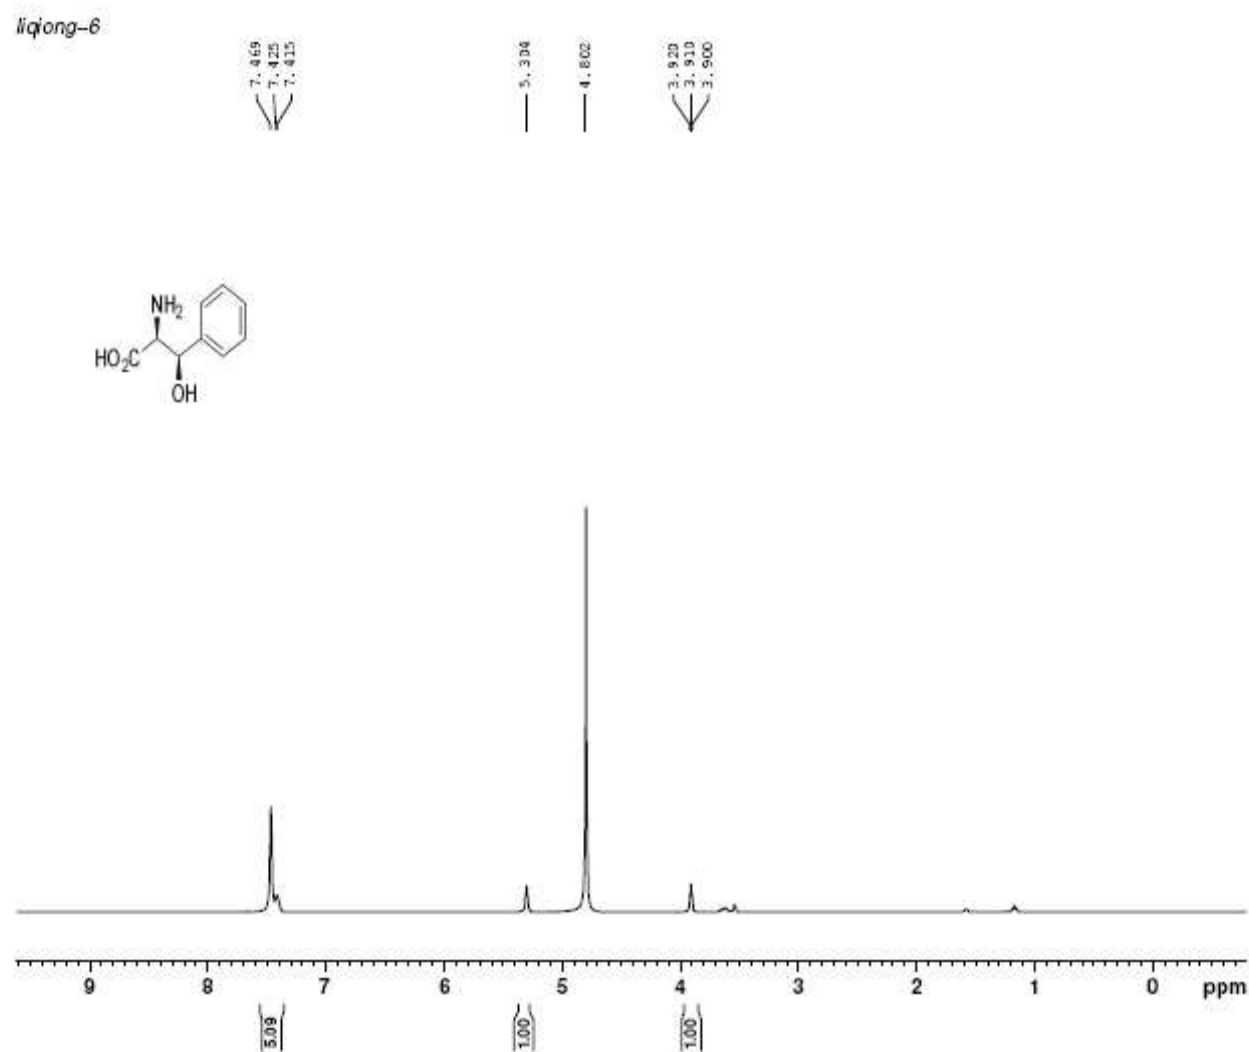

```

NAME      liqiong-6
EXPNO     20
PROCNO     1
Date_     20081209
Time      12.27
INSTRUM    spect
PROBHD     5 mm PABBO 1H-
PULPROG    zg30
TD         65536
SOLVENT    D2O
NS         16
DS         2
SWH         8223.685 Hz
FIDRES     0.125483 Hz
AQ         3.9846387 sec
RG         406
DM         49.800 usec
DE         6.50 usec
TE         292.6 K
D1         1.00000000 sec
TD0         1
----- CHANNEL F1 -----
NUC1       1H
P1         14.40 usec
PL1        0.00 dB
PL1M       11.47932853 W
SFO1       400.1324710 MHz
SI         32768
SF         400.1299548 MHz
WDW         EM
SSB         0
LB         0.30 Hz
GB         0
PC         1.00
  
```

$^{13}\text{C}$  NMR spectrum of compound **4e** (100 MHz,  $\text{D}_2\text{O}$ )

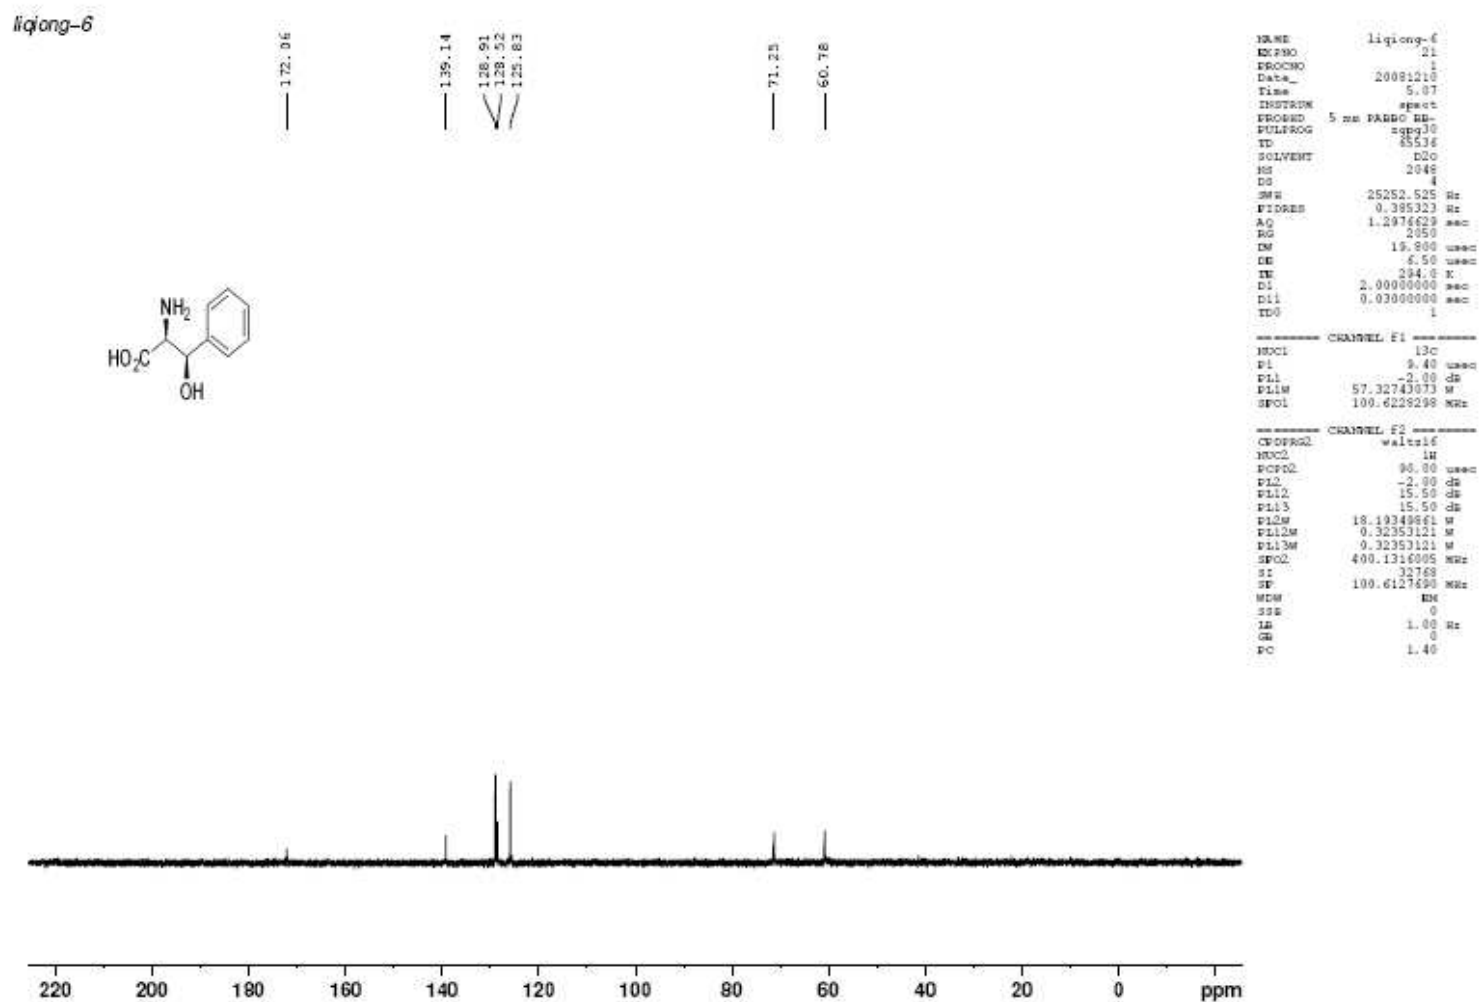



$^1\text{H}$  NMR spectrum of compound **4f** (400 MHz,  $\text{D}_2\text{O}$ )

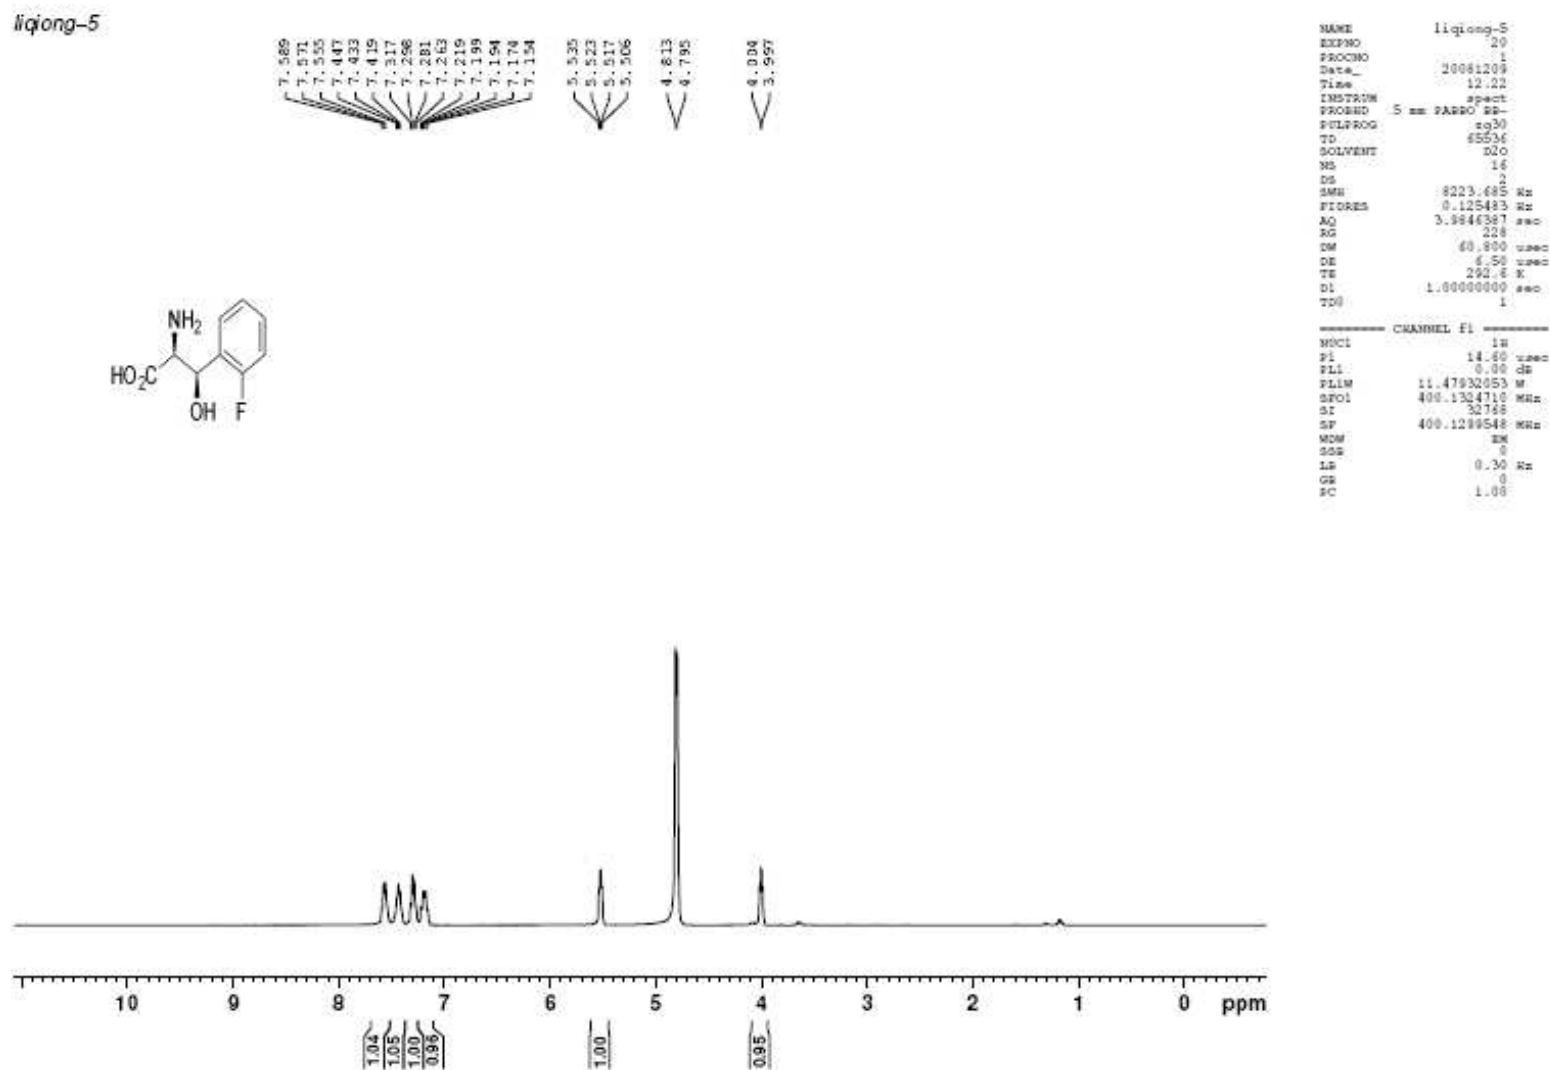

$^{13}\text{C}$  NMR spectrum of compound **4f** (100 MHz,  $\text{D}_2\text{O}$ )

liqiong-5

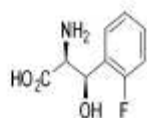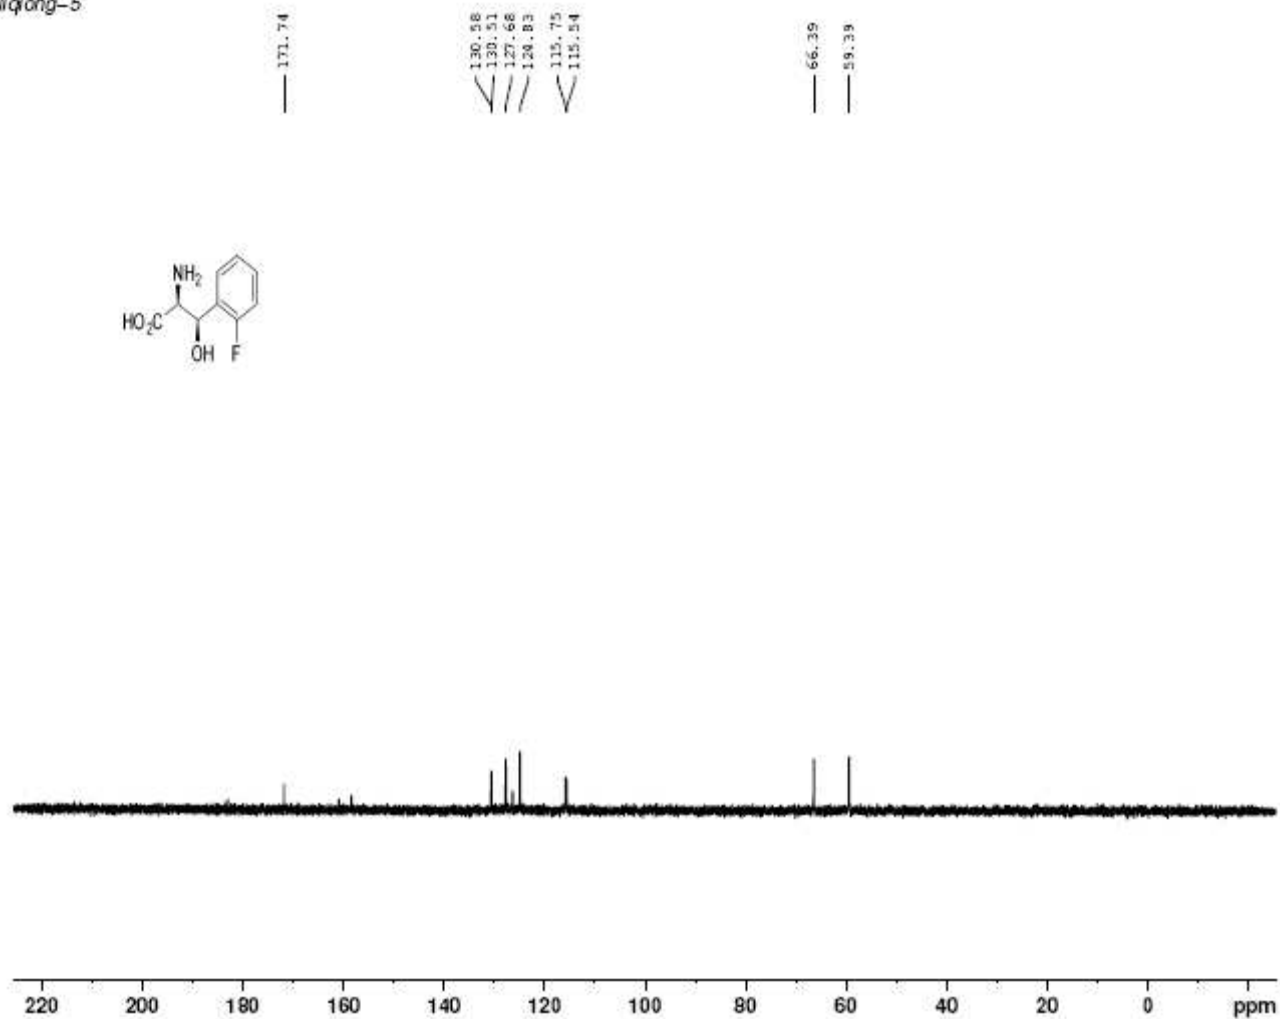

```

NAME          liqiong-5
EXPNO         21
PROCNO        1
Date_         20081210
Time          3.08
INSTRUM       spect
PROBHD        5 mm PABBO BB-
PULPROG       zgpg30
TD            65536
SOLVENT       D2O
NS            1024
DS            4
SWH           25252.525 Hz
FIDRES        0.385323 Hz
AQ            1.2976629 sec
RG            2050
IN            19.300 usec
DE            6.50 usec
TE            302.5 K
D1            2.00000000 sec
D11           0.03000000 sec
TD0           1

===== CHANNEL F1 =====
NUC1          13C
P1            9.40 usec
PL1           -2.00 dB
PL1W          57.32743073 W
SFO1          100.6228298 MHz

===== CHANNEL F2 =====
CPDPRG2       waltz16
NUC2          1H
PCPD2         90.00 usec
PL2           -2.00 dB
PL12          15.50 dB
PL13          15.50 dB
PL1W          18.19349861 W
PL12W         0.32353121 W
PL13W         0.32353121 W
SFO2          400.1316005 MHz
SI            32768
SF            100.6127694 MHz
WDW           EM
SSB           0
GB            0
PC            1.40
  
```

$^1\text{H}$  NMR spectrum of compound **4g** (400 MHz,  $\text{D}_2\text{O}$ )

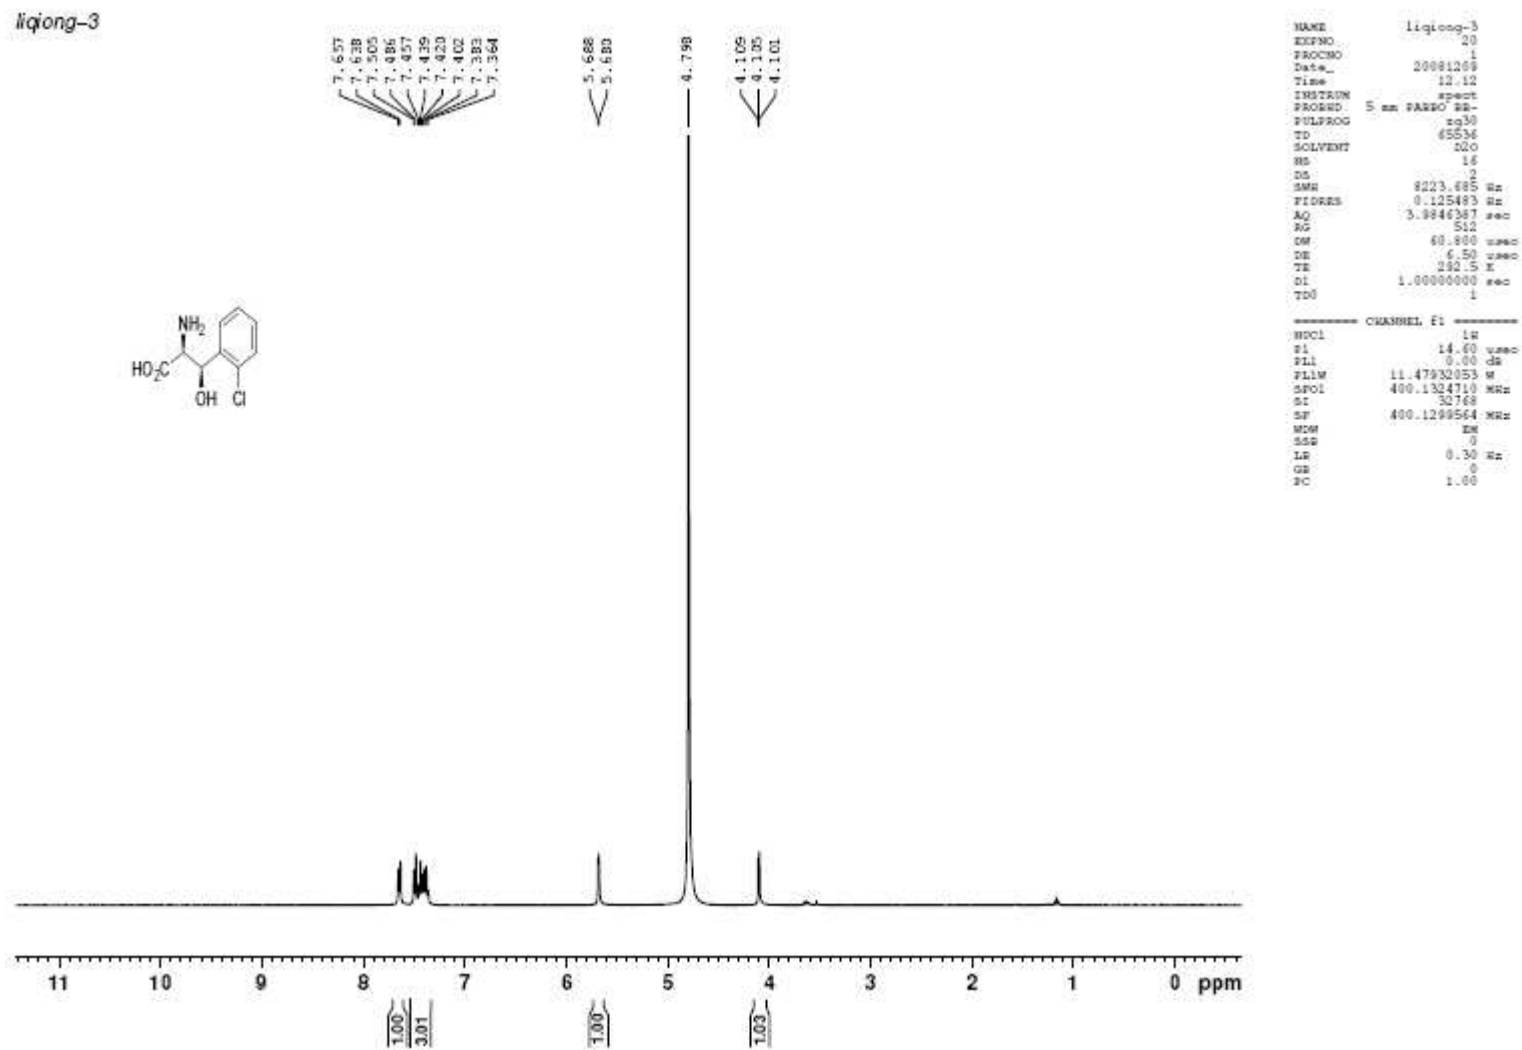

$^{13}\text{C}$  NMR spectrum of compound **4g** (100 MHz,  $\text{D}_2\text{O}$ )

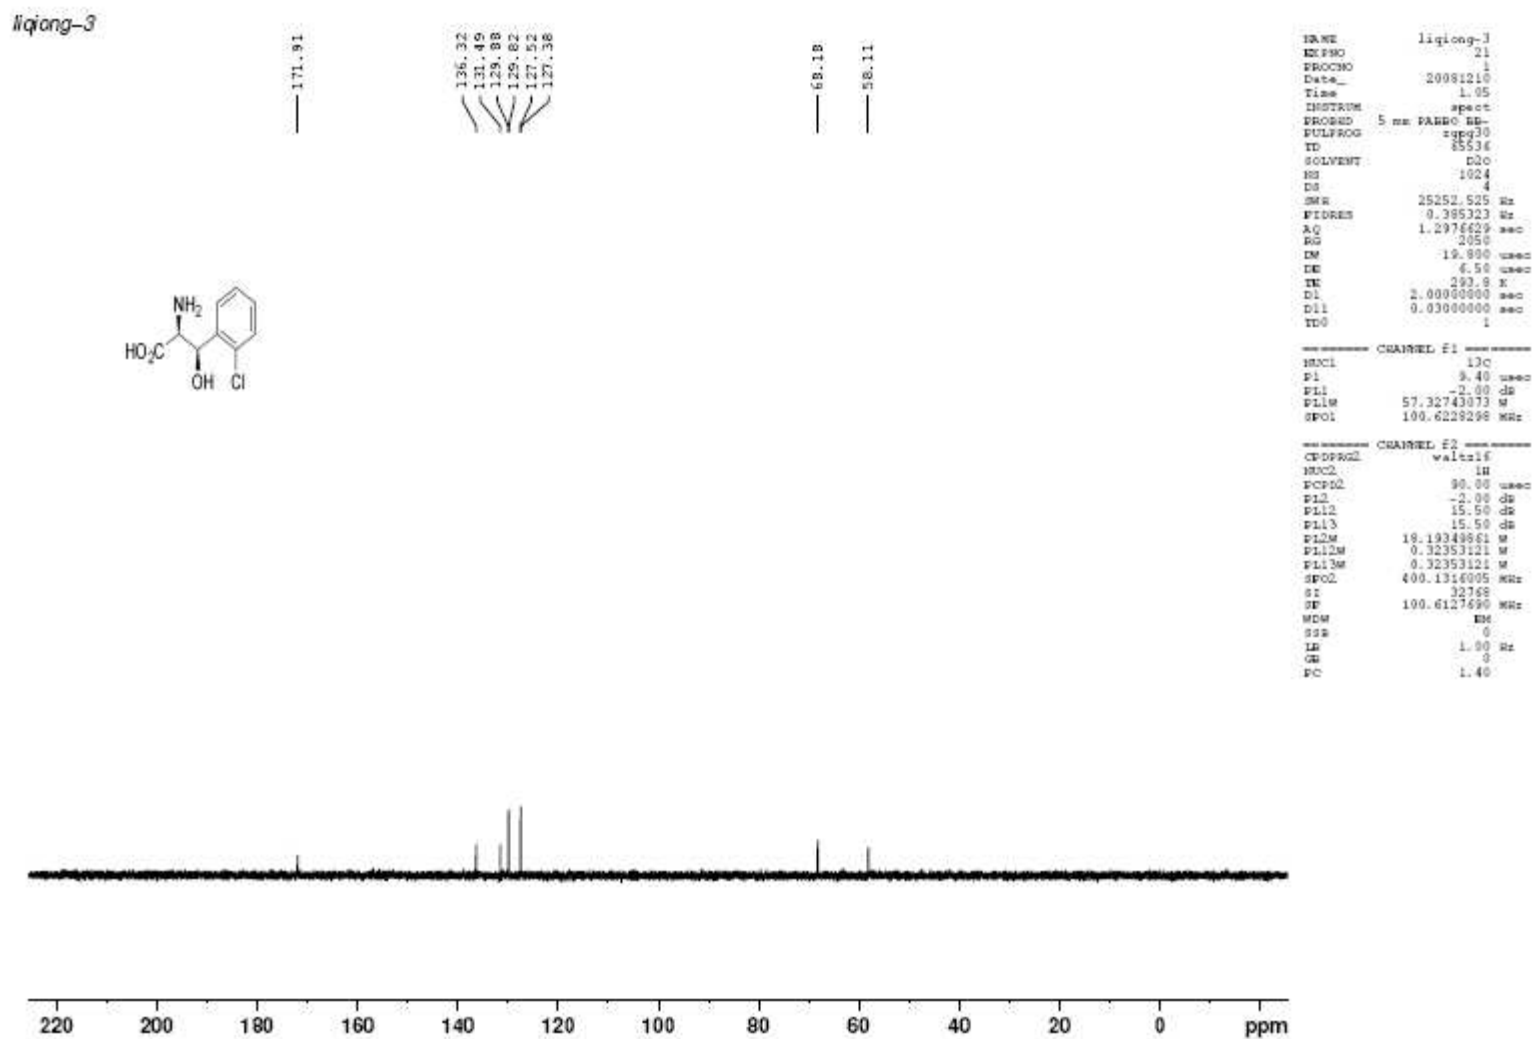

$^1\text{H}$  NMR spectrum of compound **5c** (400 MHz,  $\text{D}_2\text{O}$ )

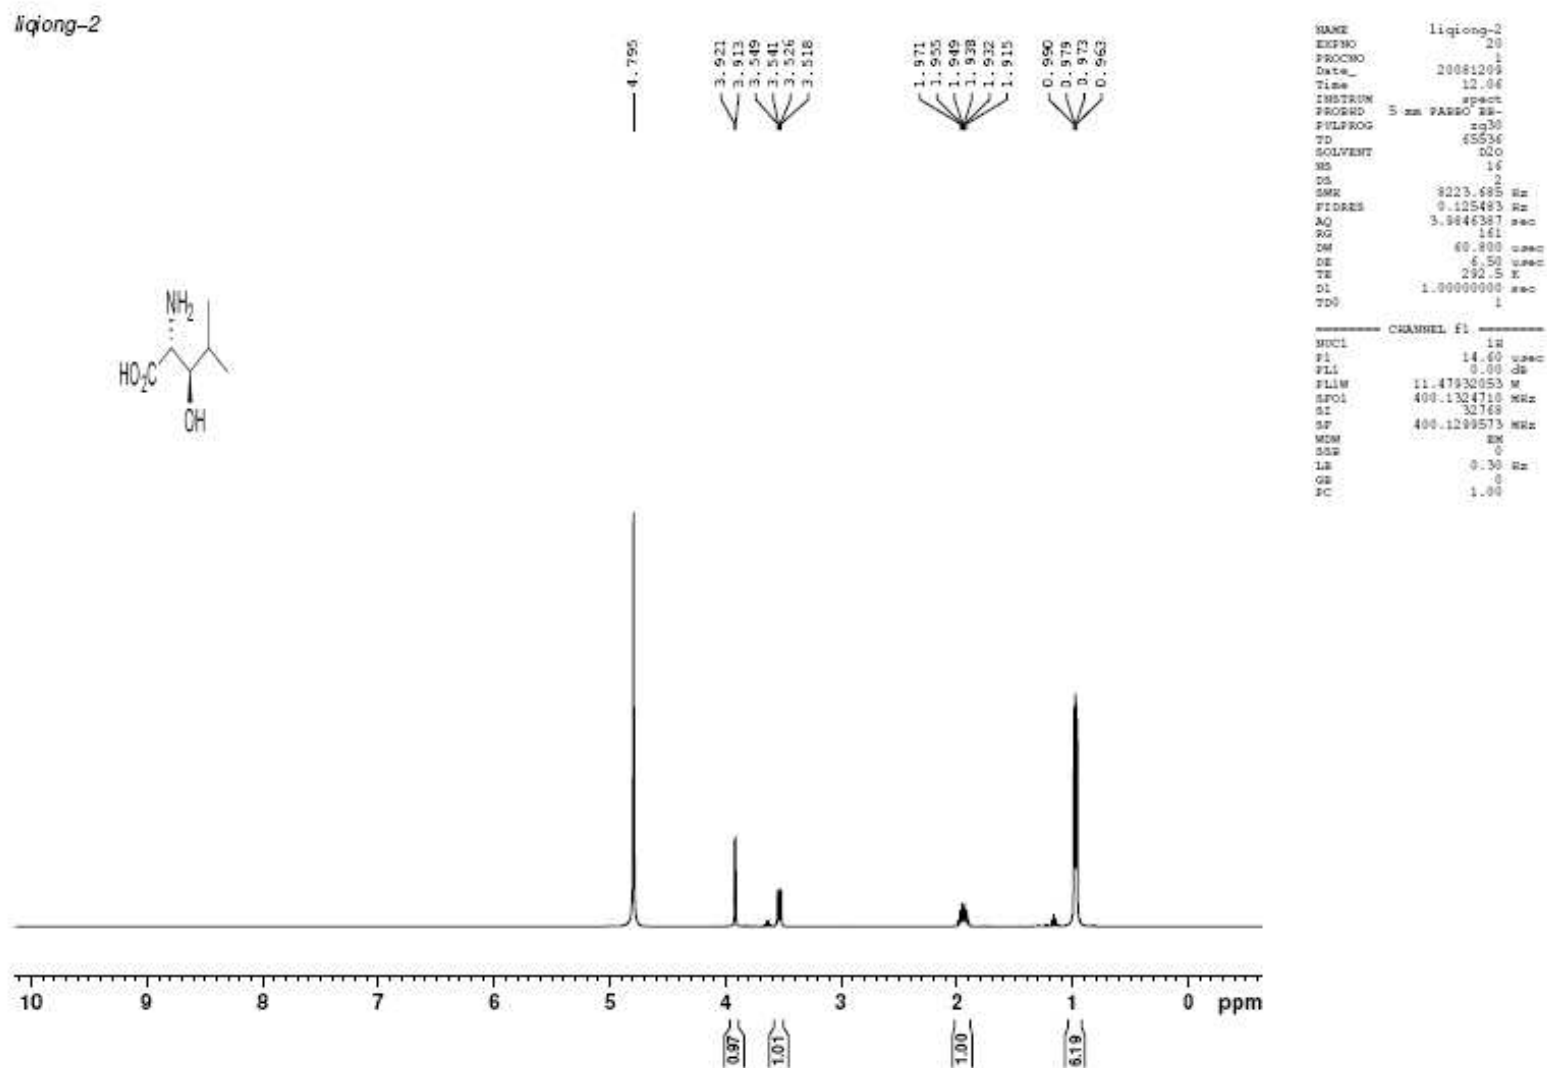

$^{13}\text{C}$  NMR spectrum of compound **5c** (100 MHz,  $\text{D}_2\text{O}$ )

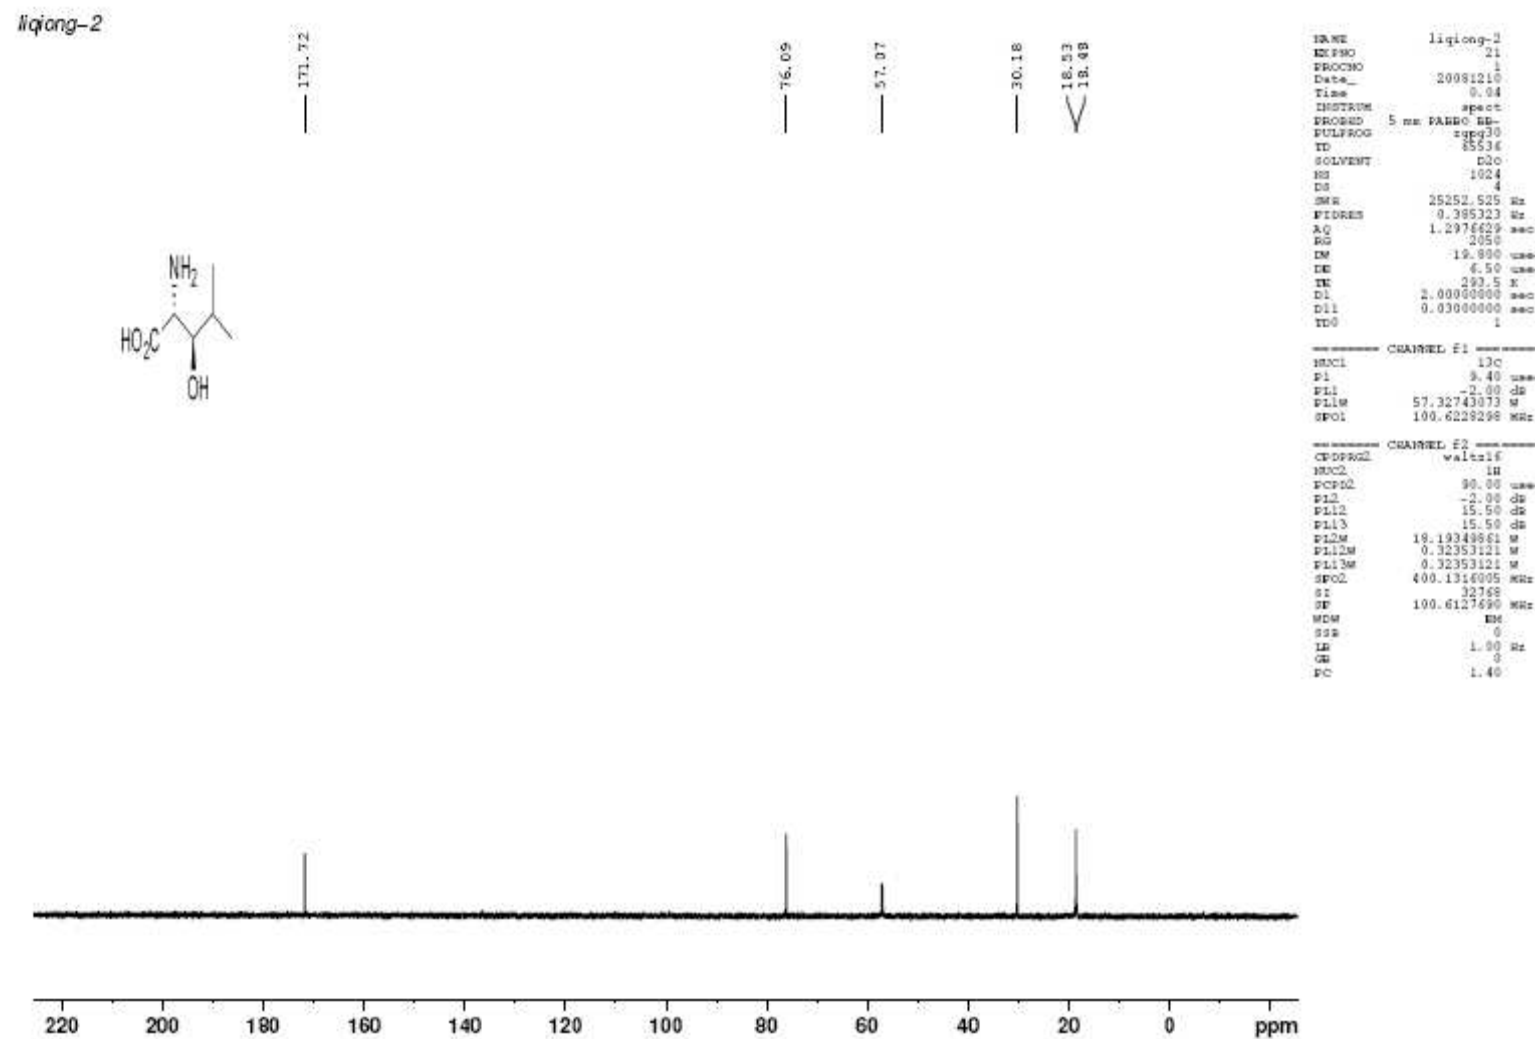

$^1\text{H}$  NMR spectrum of compound **5d** (400 MHz,  $\text{D}_2\text{O}$ )

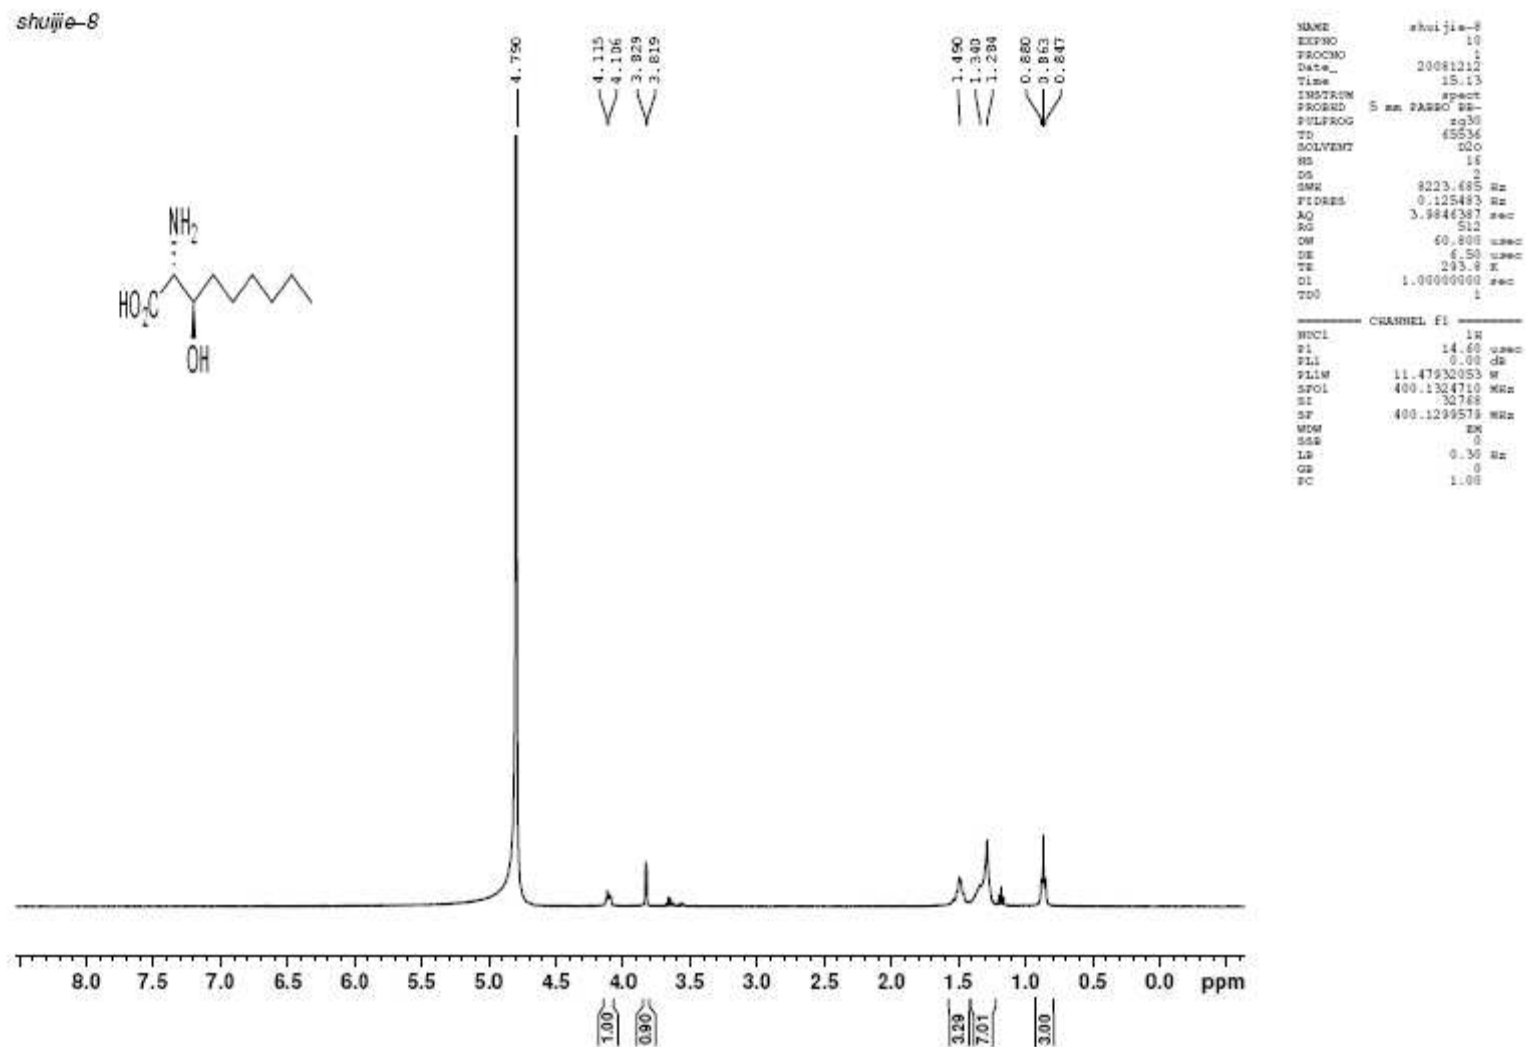

$^{13}\text{C}$  NMR spectrum of compound **5d** (100 MHz,  $\text{D}_2\text{O}$ )

shuijie8c

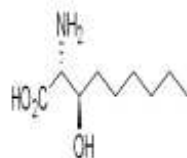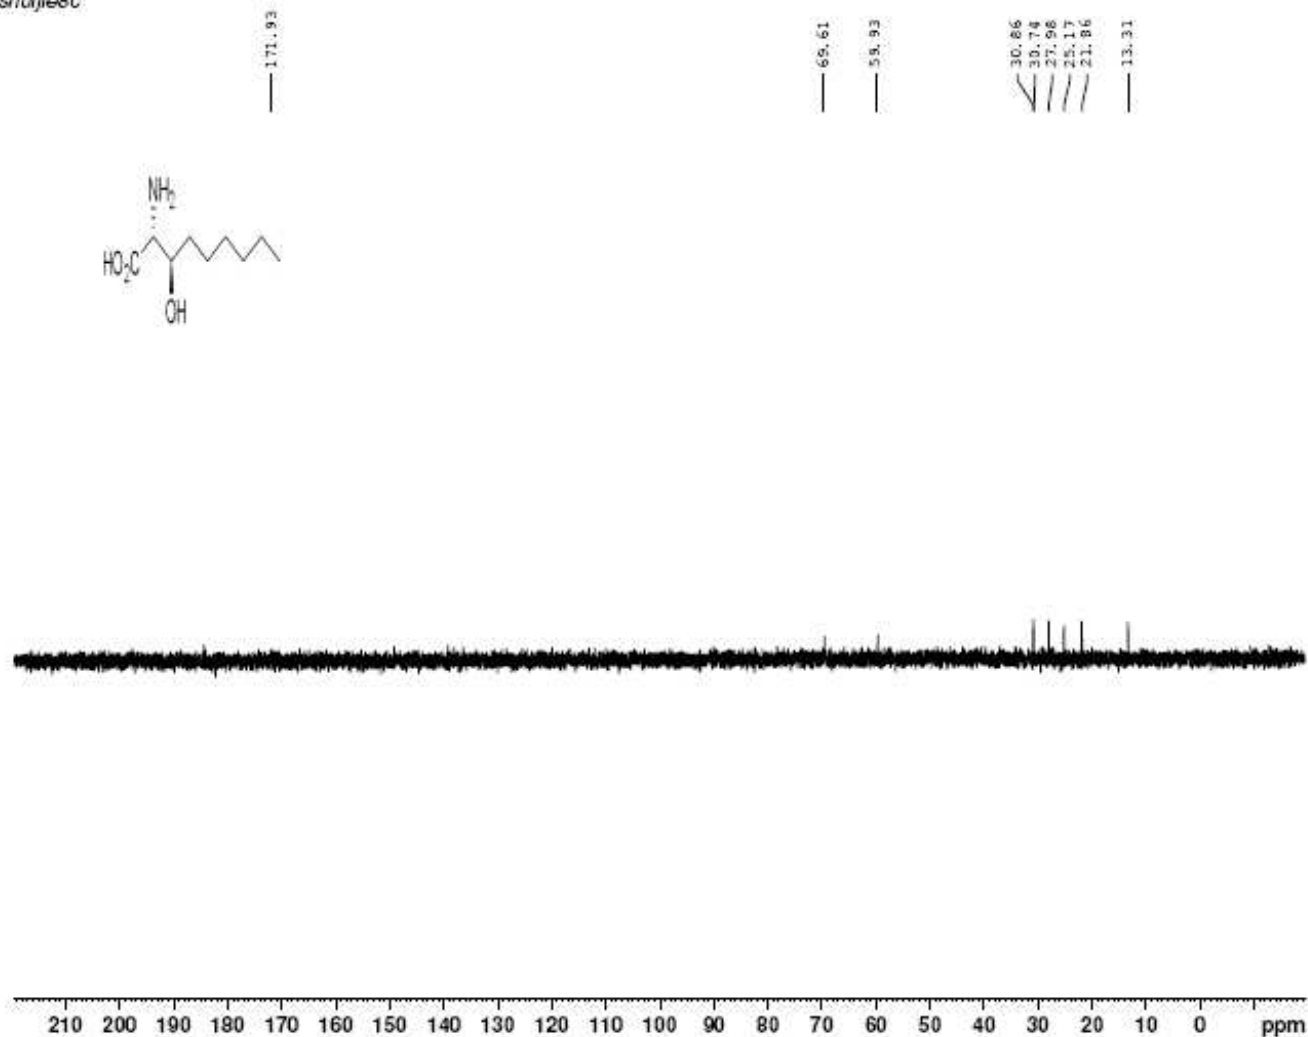

```

NAME      shuijie8c
EXPNO     10
PROCNO    20081218
Data_
Time       2.04
INSTRUM    spect
PROBHD     5 mm DABBO BB-
PULPROG    zgpg30
TD         65536
SOLVENT    D2O
NS         2048
DS         4
SWH         24036.461 Hz
FIDRES     0.366798 Hz
AQ         1.3631988 sec
RG         2050
IN         20.000 usec
DE         6.50 usec
TE         293.1 K
D1         2.00000000 sec
D11        0.03000000 sec
TD0        1
  
```

```

===== CHANNEL f1 =====
NUC1       13C
P1         9.40 usec
PL1        -2.00 dB
PL1W       57.32743073 W
SFO1       100.6228298 MHz
  
```

```

===== CHANNEL f2 =====
CPDPRG2    waltz16
NUC2       1H
PCPD2      90.00 usec
PL2        -2.00 dB
PL12       15.50 dB
PL13       15.50 dB
PL2W       19.19349961 W
PL12W      0.32353121 W
PL13W      0.32353121 W
SFO2       400.1316005 MHz
SI         32768
SF         100.6127690 MHz
WDW         EM
SSB         0
LB         1.00 Hz
GB         0
PC         1.40
  
```



$^1\text{H}$  NMR spectrum of compound **5f** (400 MHz,  $\text{D}_2\text{O}$ )

shuijie-9

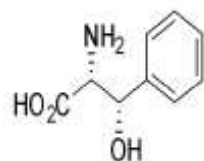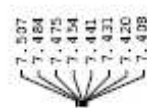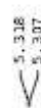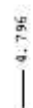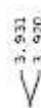

```

NAME      shuijie-9
EXPNO     10
PROCNO    1
Date_     20081212
Time      15.13
INSTRUM    spect
PROBHD     5 mm FARGO BB-
PULPROG    zg30
TD         65536
SOLVENT    D2O
NS         29
DS         2
SMR        8223.685 Hz
FIDRES     0.125483 Hz
AQ         3.9846387 sec
RG         406
DM         60.800 usec
DE         6.50 usec
TE         283.8 K
D1         1.00000000 sec
TDO        1
  
```

```

----- CHANNEL f1 -----
NUC1       1H
P1         14.60 usec
PL1        0.00 dB
PL12       11.47932053 W
SFO1       400.1324710 MHz
SI         32768
SF         400.1299564 MHz
MGM        RM
SGB        0
LB         0.30 Hz
GB         0
PC         1.00
  
```

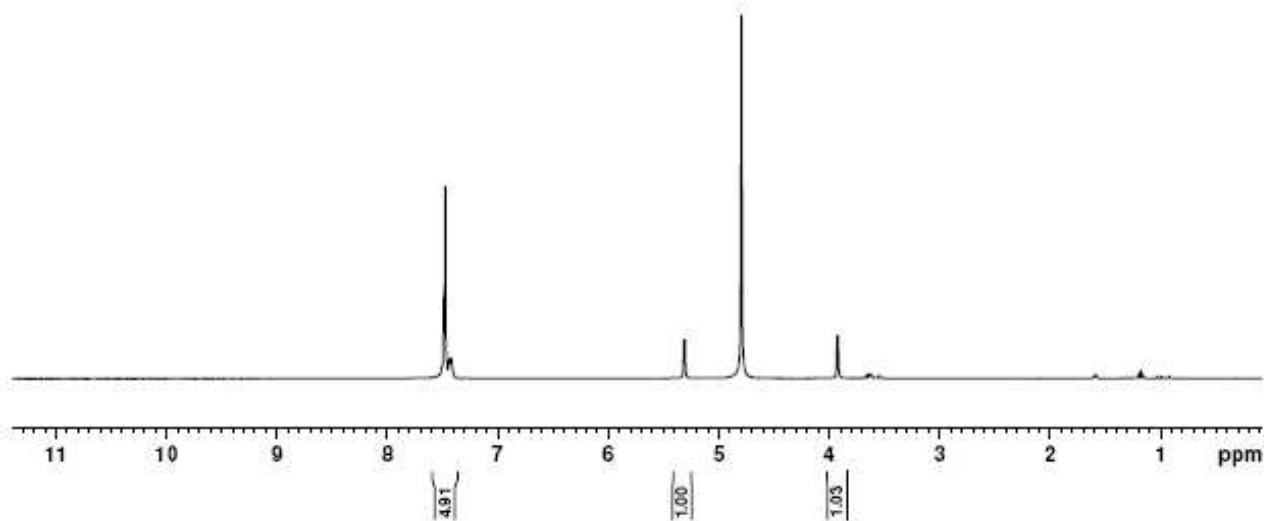

$^{13}\text{C}$  NMR spectrum of compound **5f** (100 MHz,  $\text{D}_2\text{O}$ )

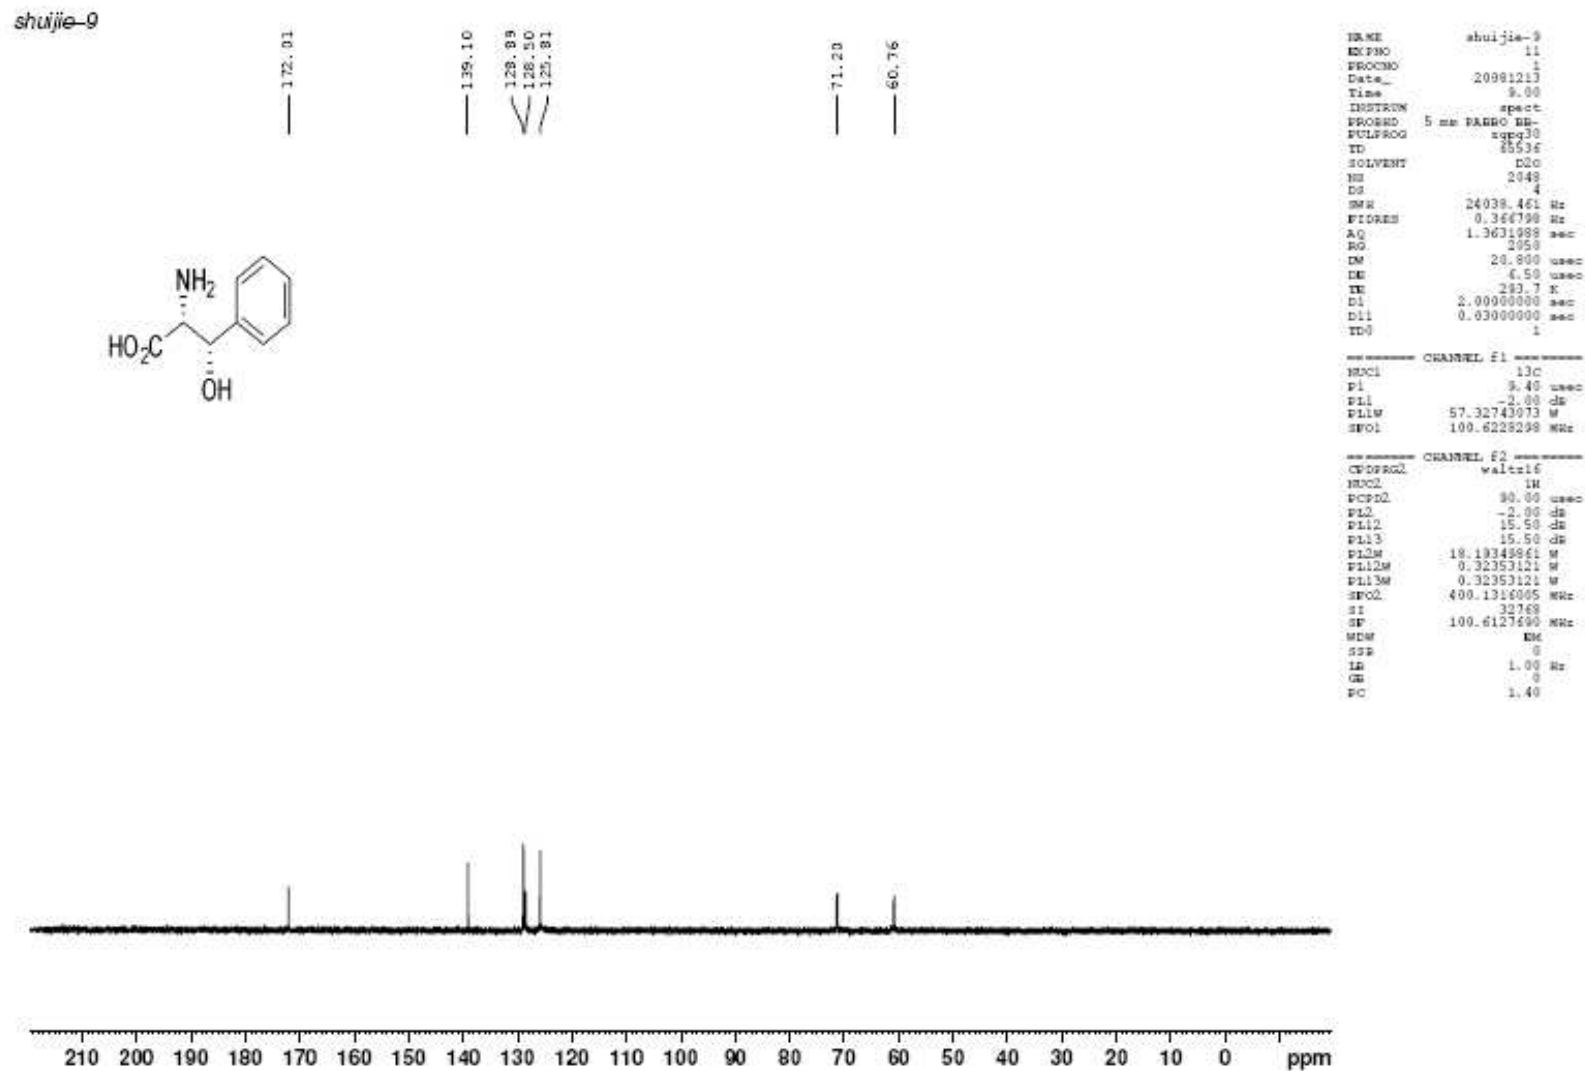

$^1\text{H}$  NMR spectrum of compound **5g** (400 MHz,  $\text{D}_2\text{O}$ )

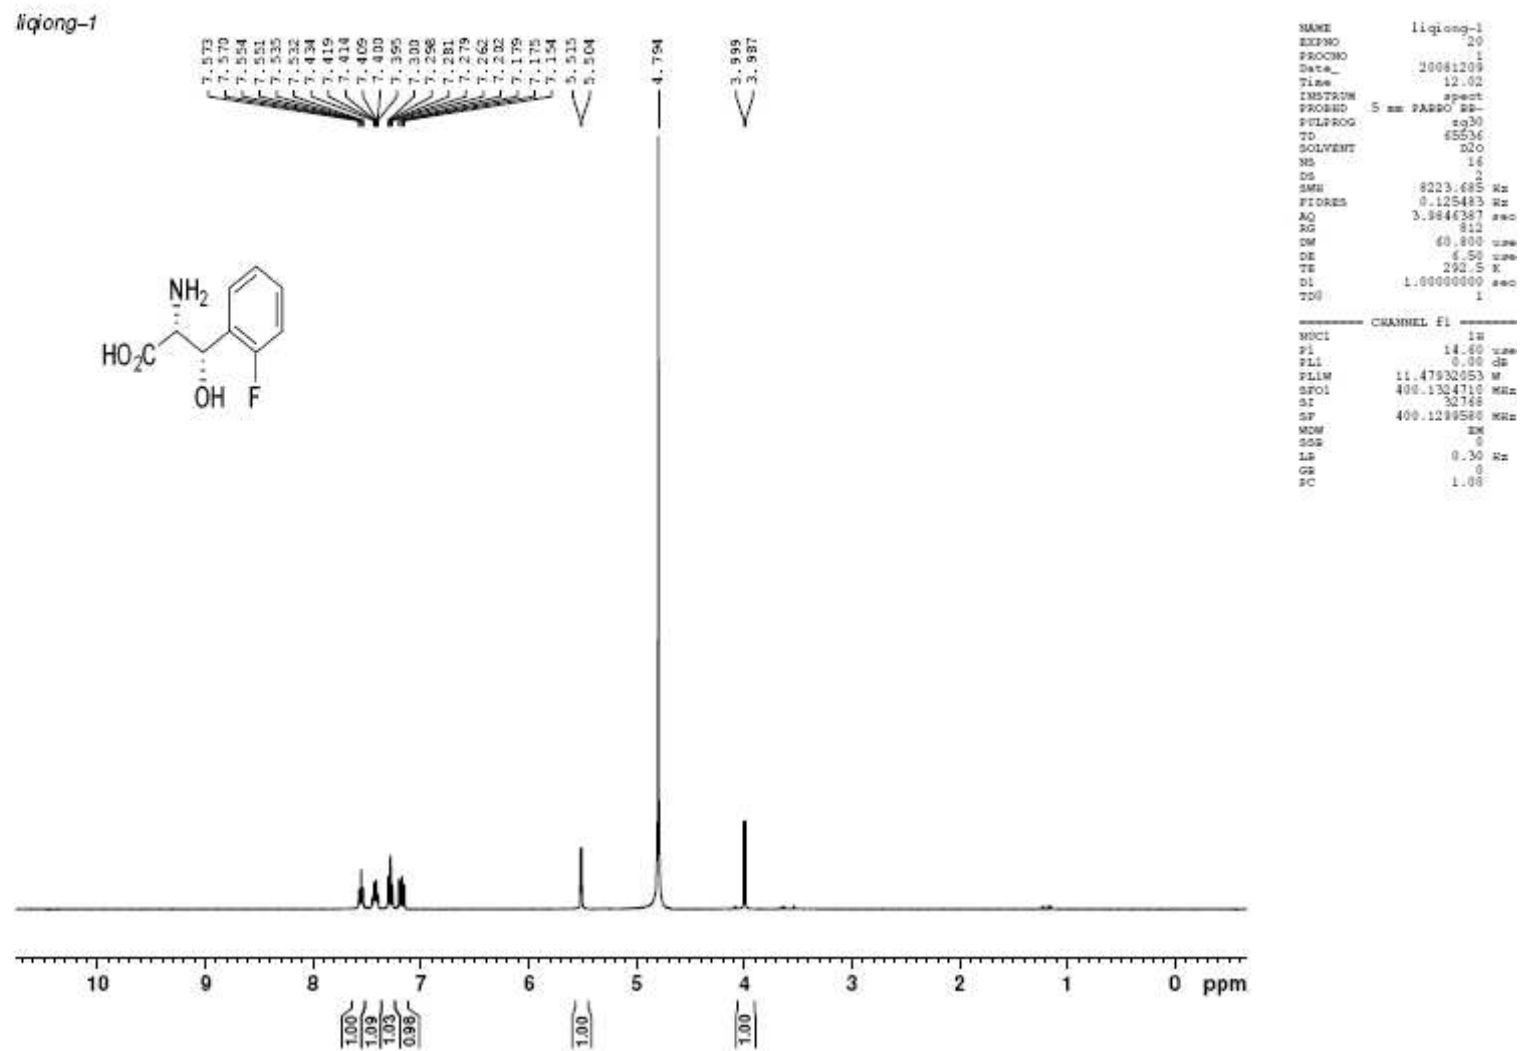

$^{13}\text{C}$  NMR spectrum of compound **5g** (100 MHz,  $\text{D}_2\text{O}$ )

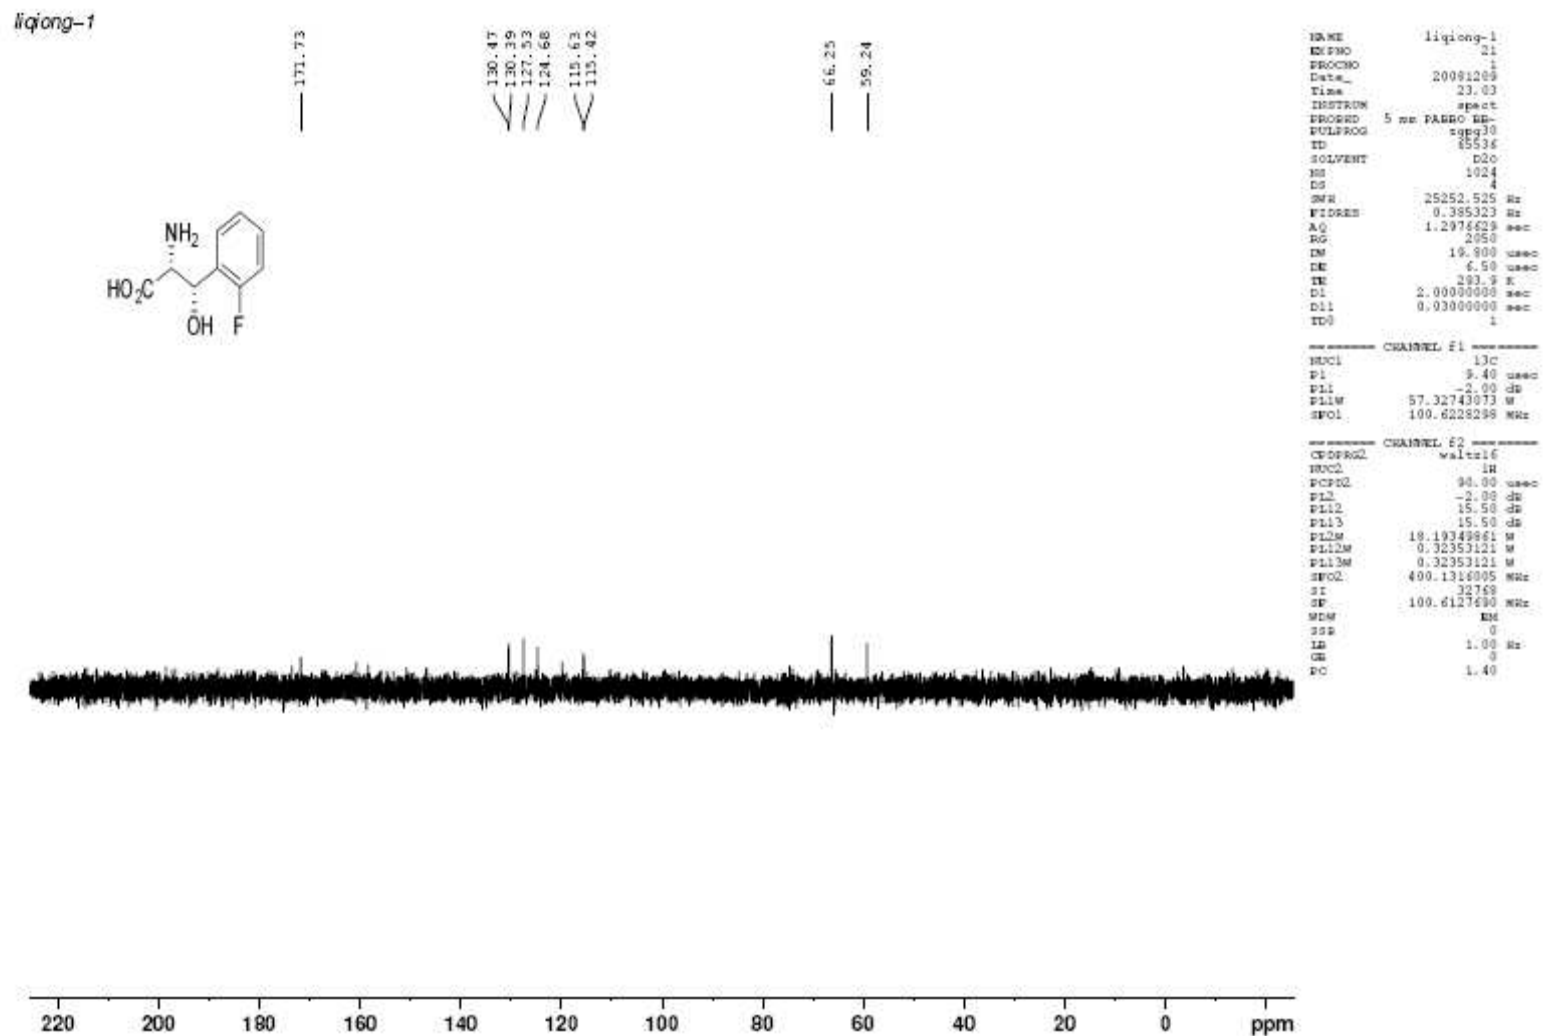

$^1\text{H}$  NMR spectrum of compound **5h** (400 MHz,  $\text{D}_2\text{O}$ )

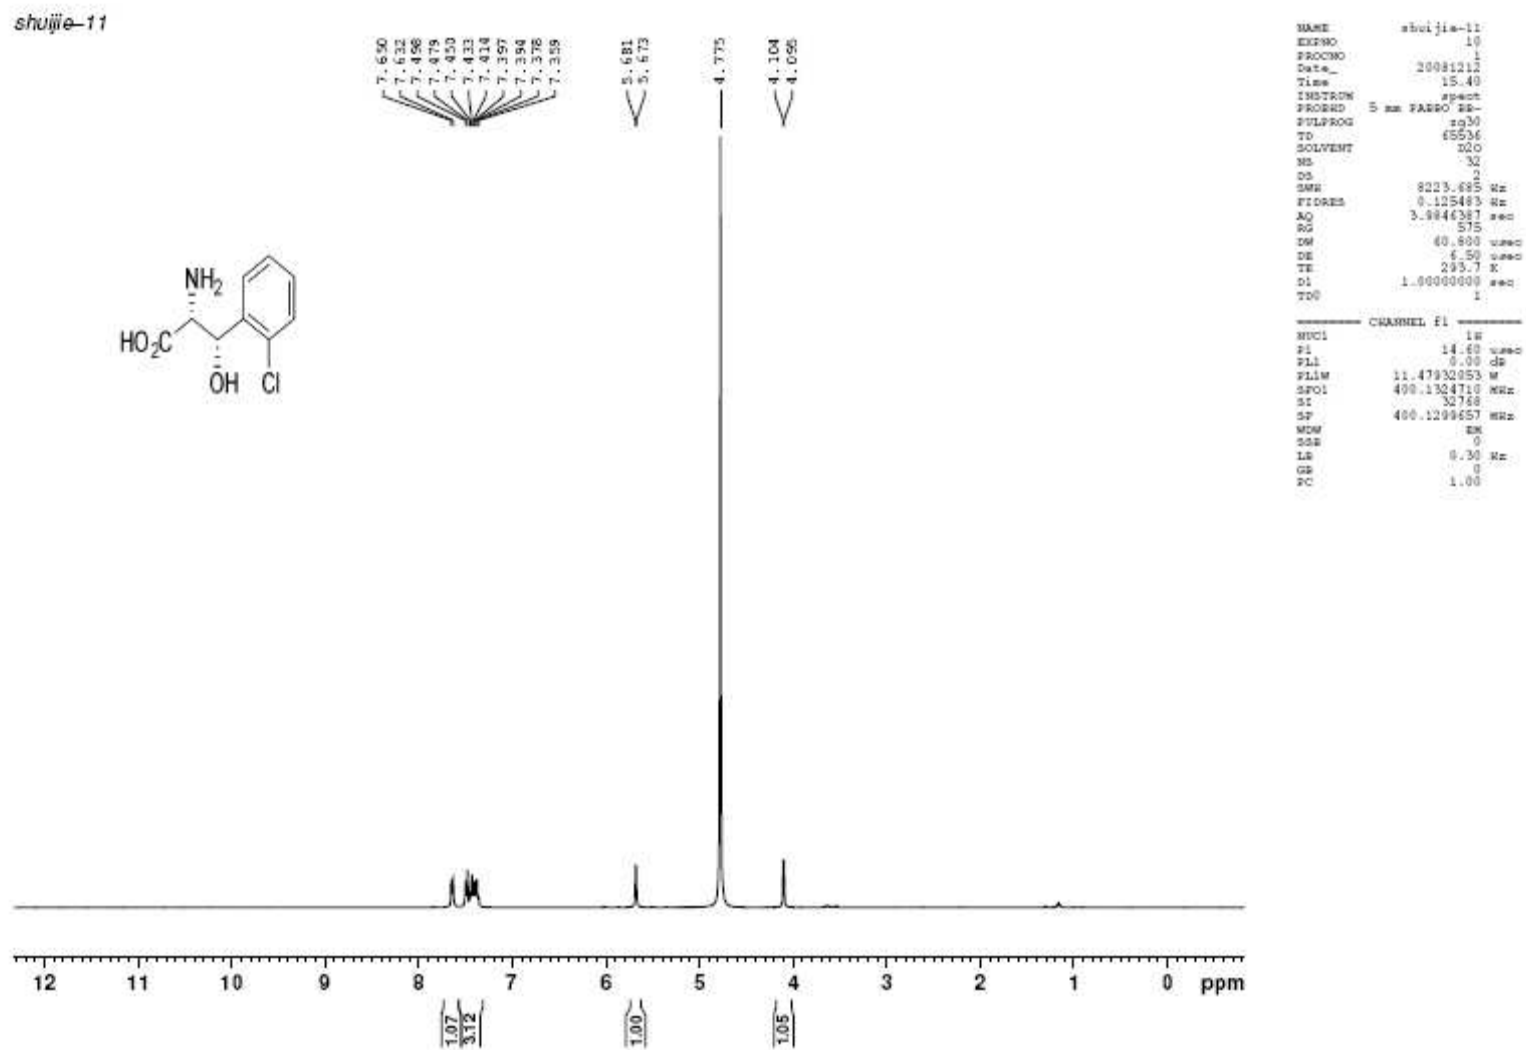

$^{13}\text{C}$  NMR spectrum of compound **5h** (100 MHz,  $\text{D}_2\text{O}$ )

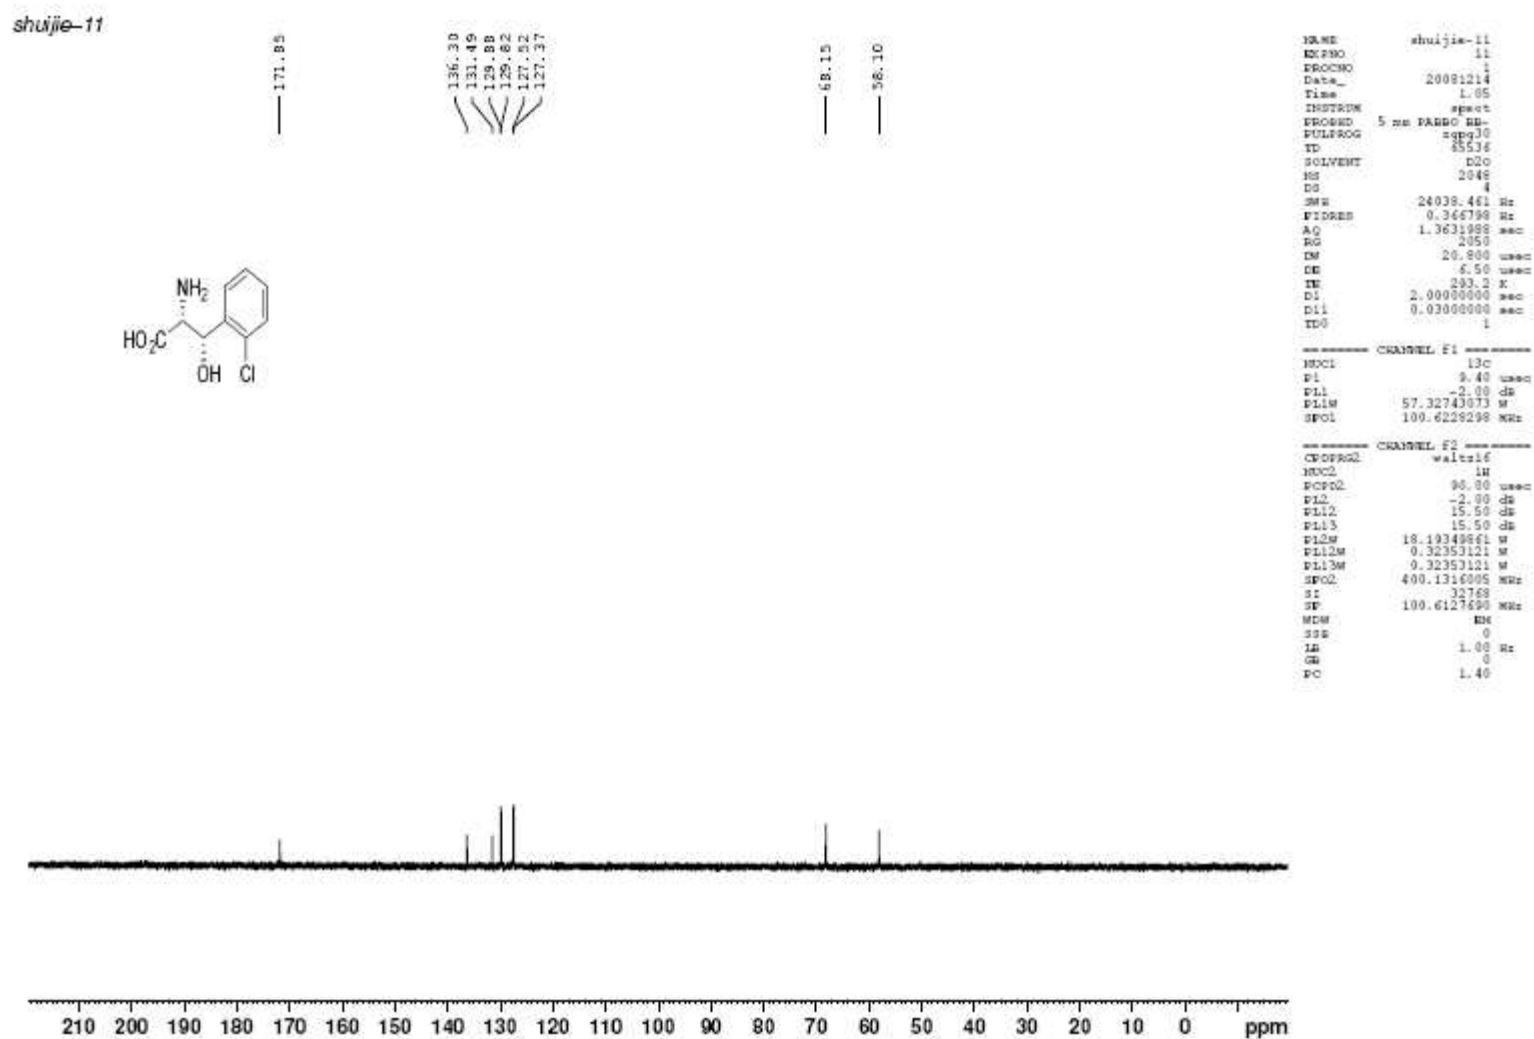

$^1\text{H}$  NMR spectrum of compound **8** (400 MHz,  $\text{CDCl}_3$ )

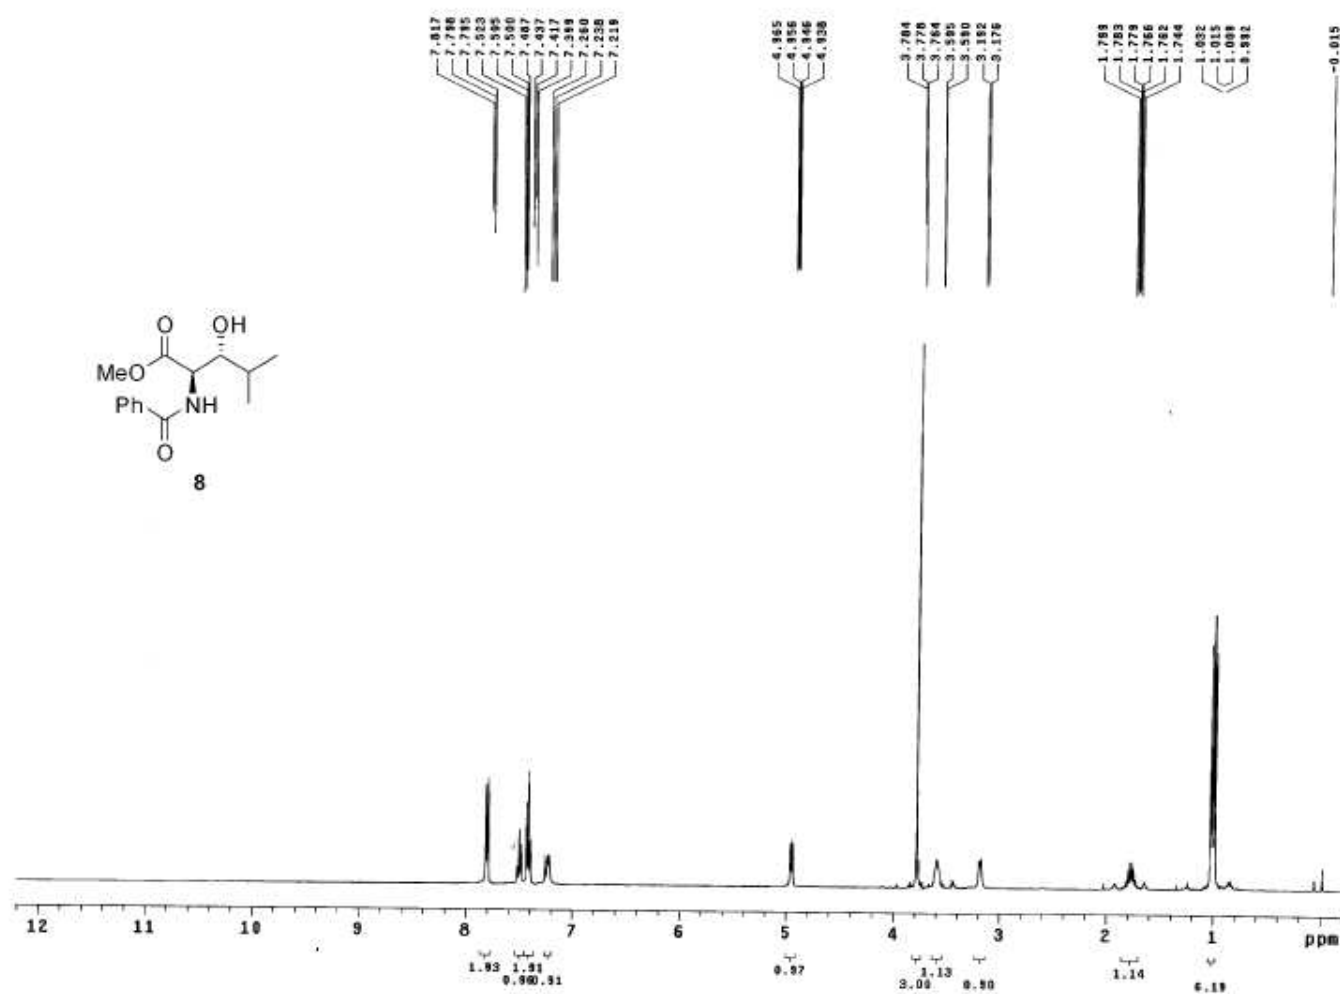

$^{13}\text{C}$  NMR spectrum of compound **8** (100 MHz,  $\text{CDCl}_3$ )

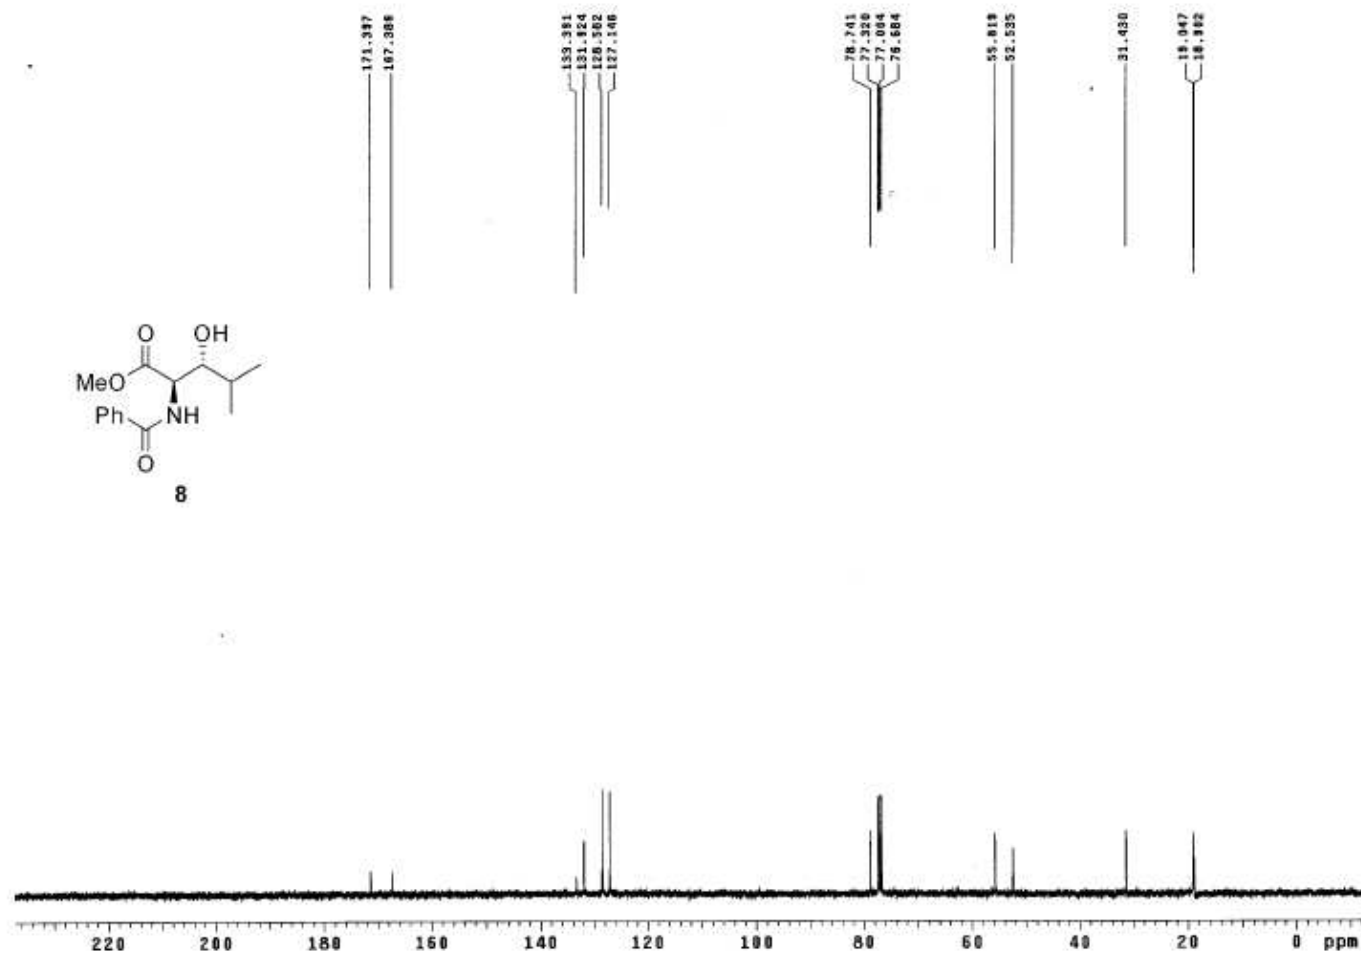



$^1\text{H}$  NMR spectrum of compound **9** (400 MHz,  $\text{CDCl}_3$ )

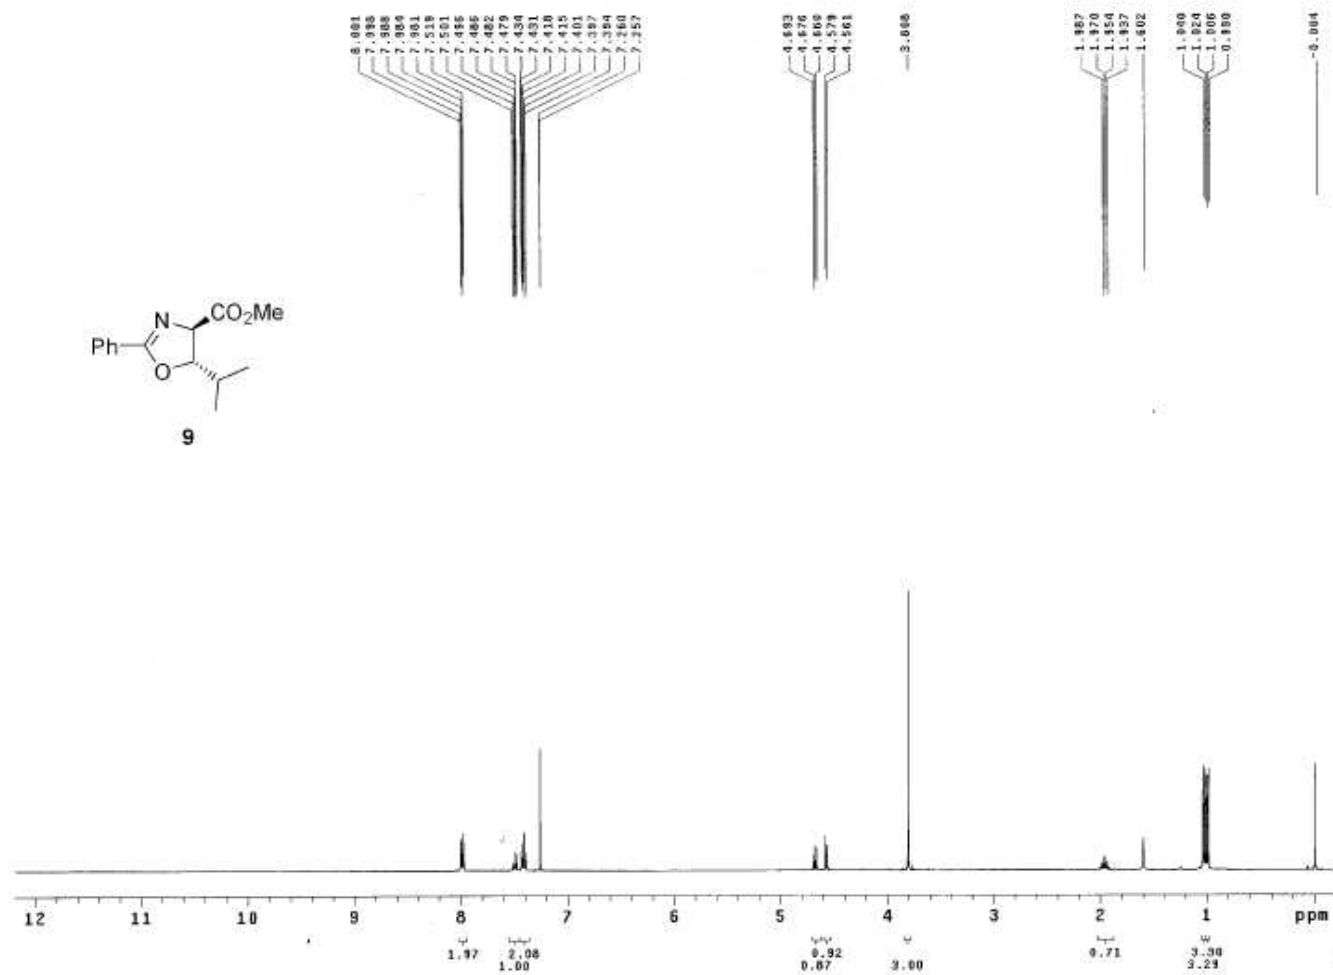

$^{13}\text{C}$  NMR spectrum of compound **9** (100 MHz,  $\text{CDCl}_3$ )

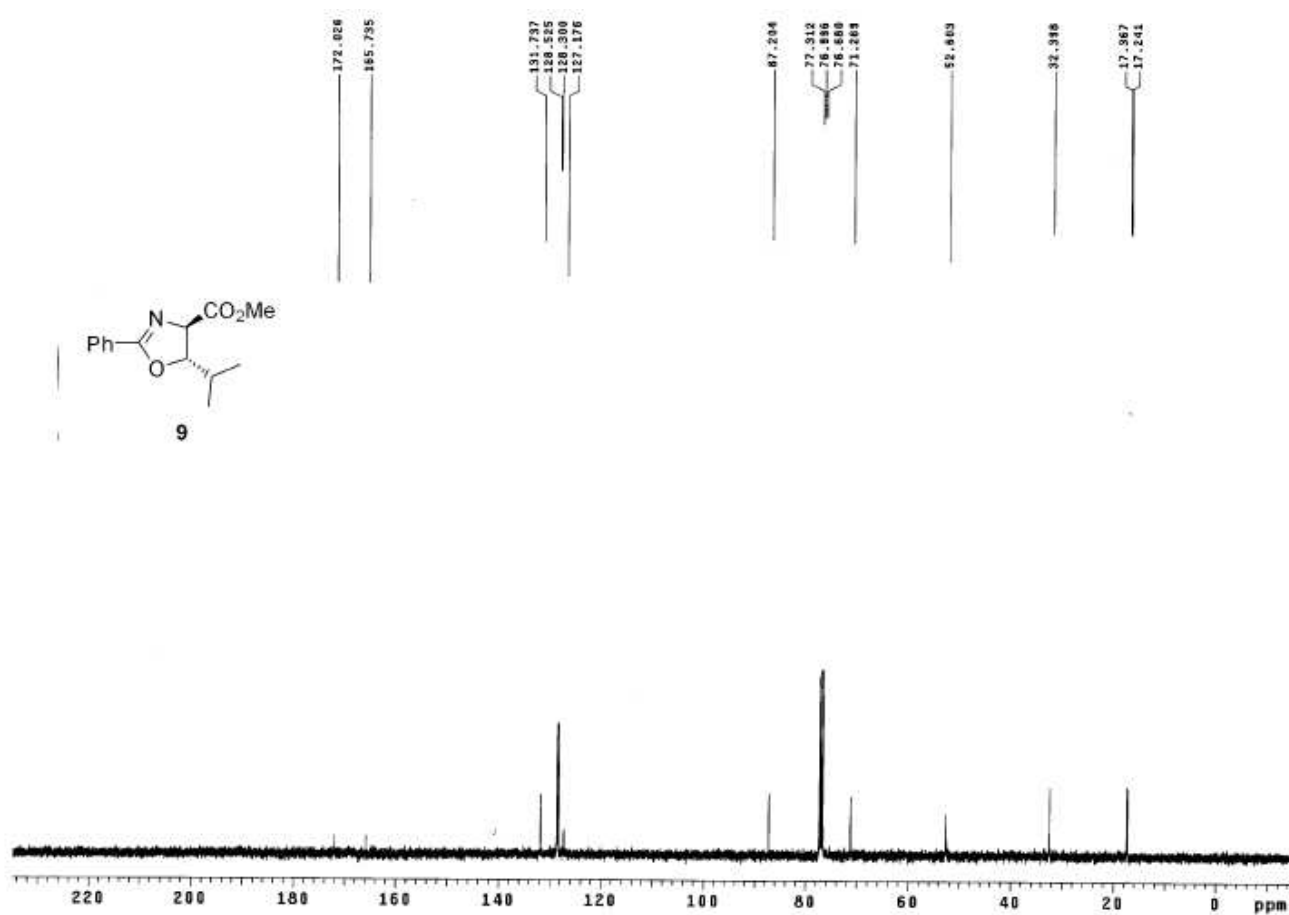

$^1\text{H}$  NMR spectrum of compound **10** (400 MHz,  $\text{CDCl}_3$ )

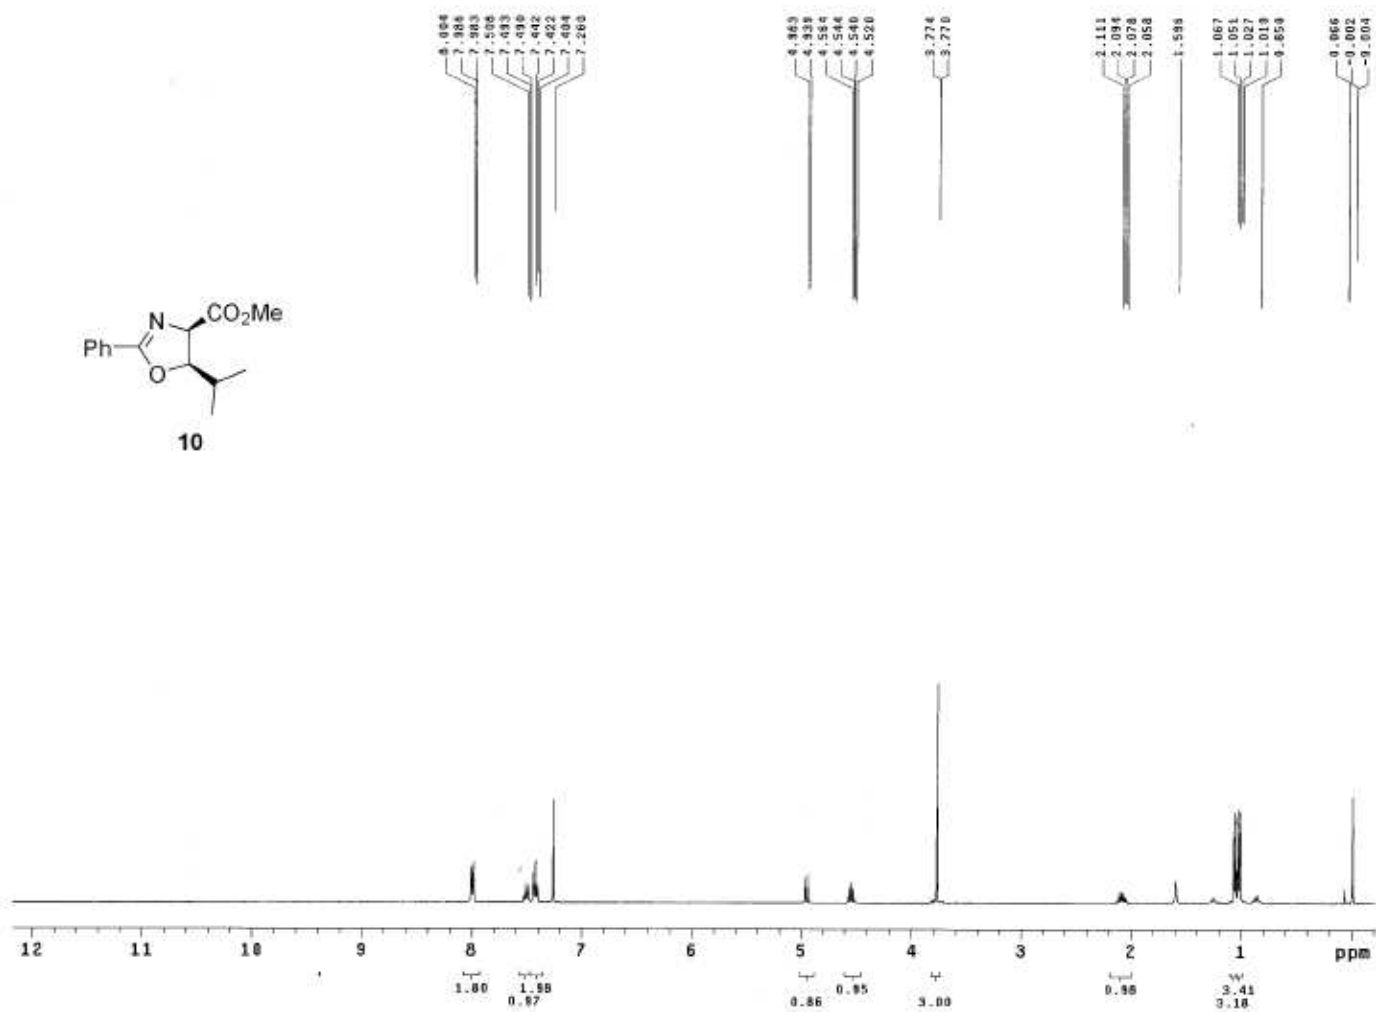

$^{13}\text{C}$  NMR spectrum of compound **10** (100 MHz,  $\text{CDCl}_3$ )

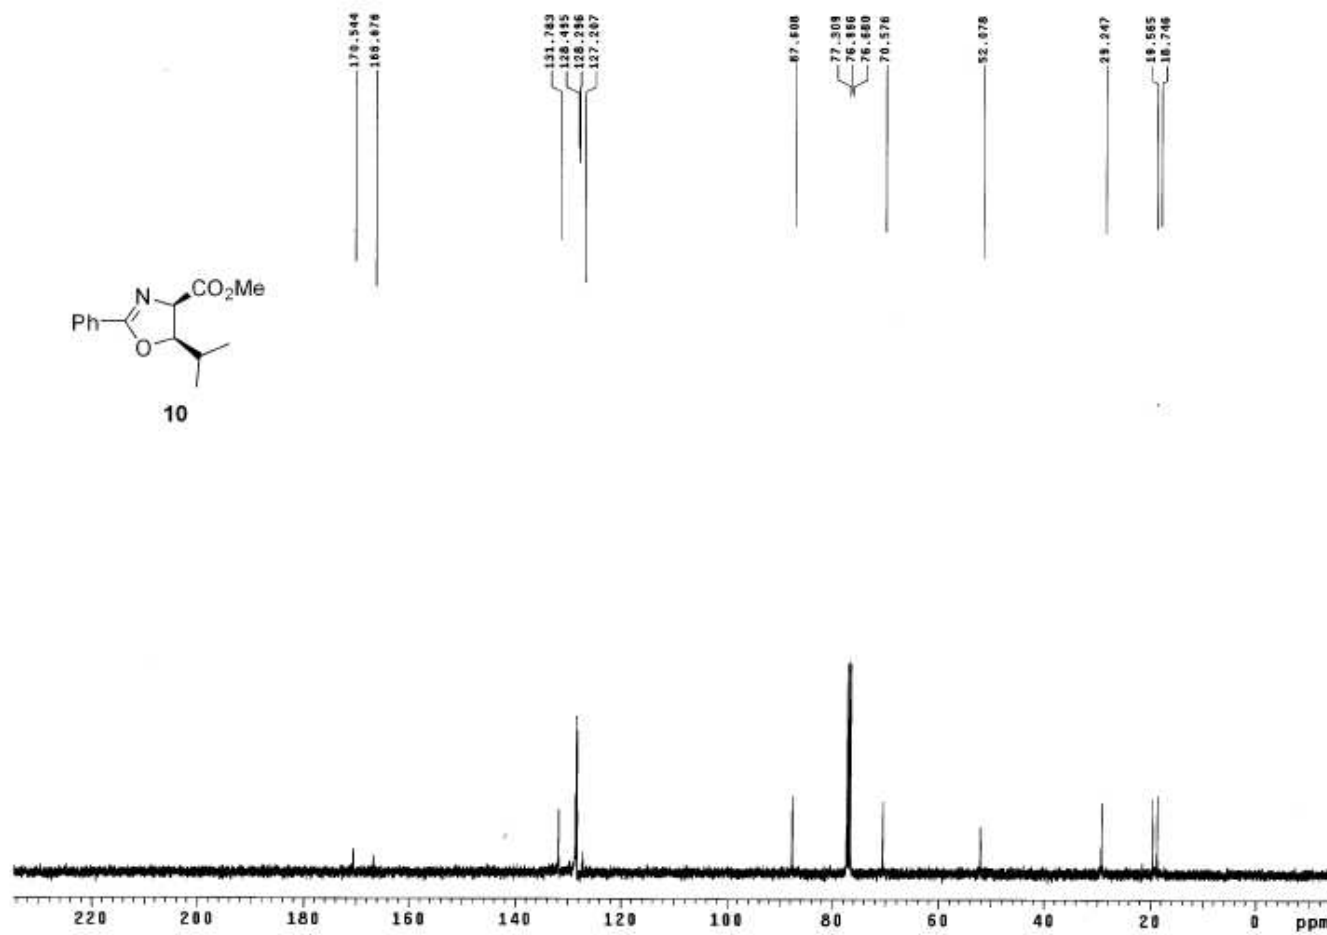

$^1\text{H}$  NMR spectrum of compound **12** (400 MHz,  $\text{CDCl}_3$ )

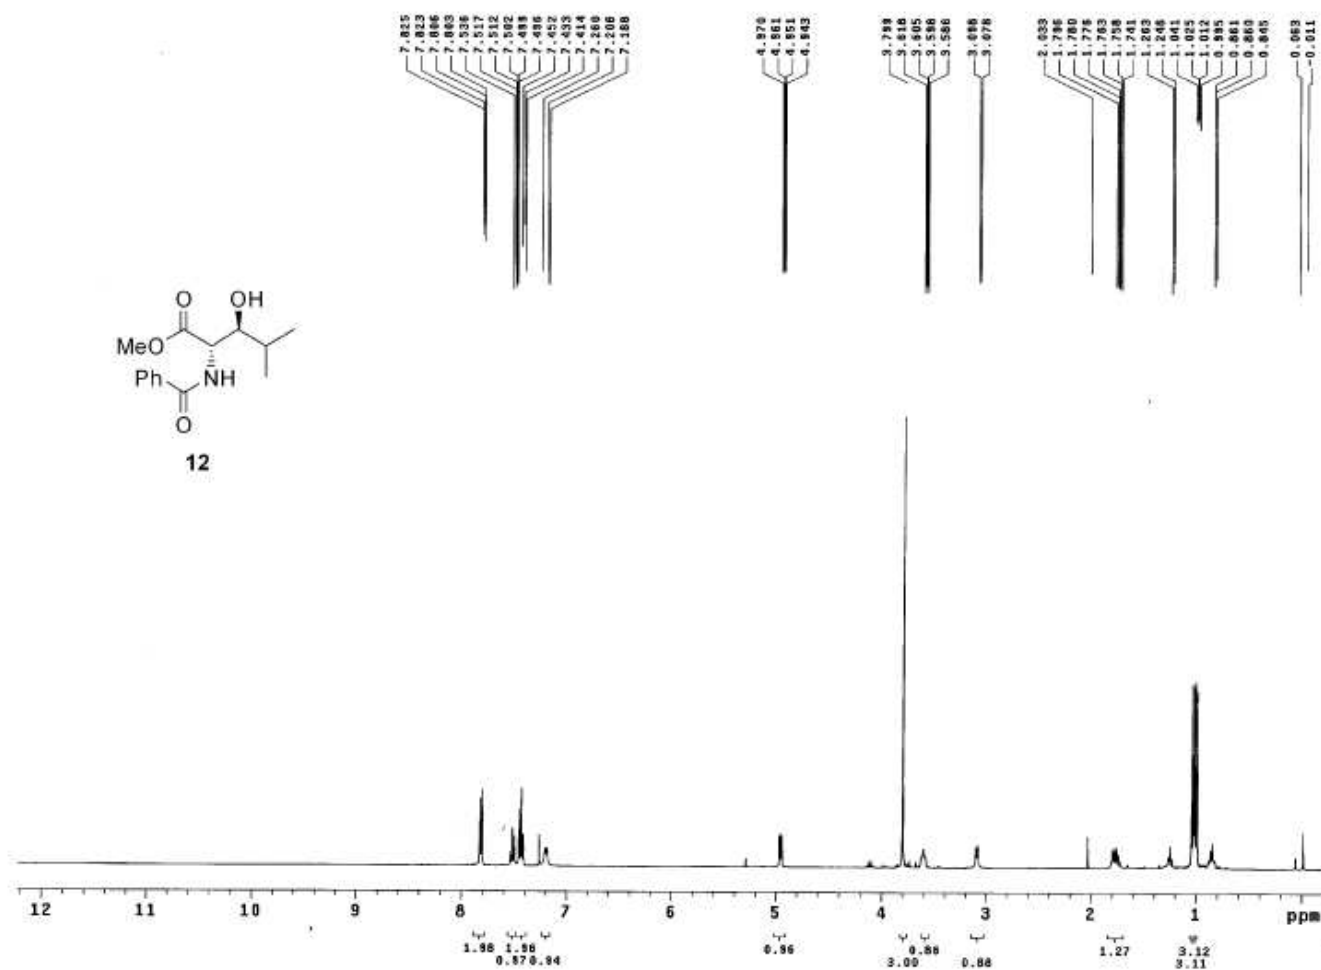

$^{13}\text{C}$  NMR spectrum of compound **12** (100 MHz,  $\text{CDCl}_3$ )

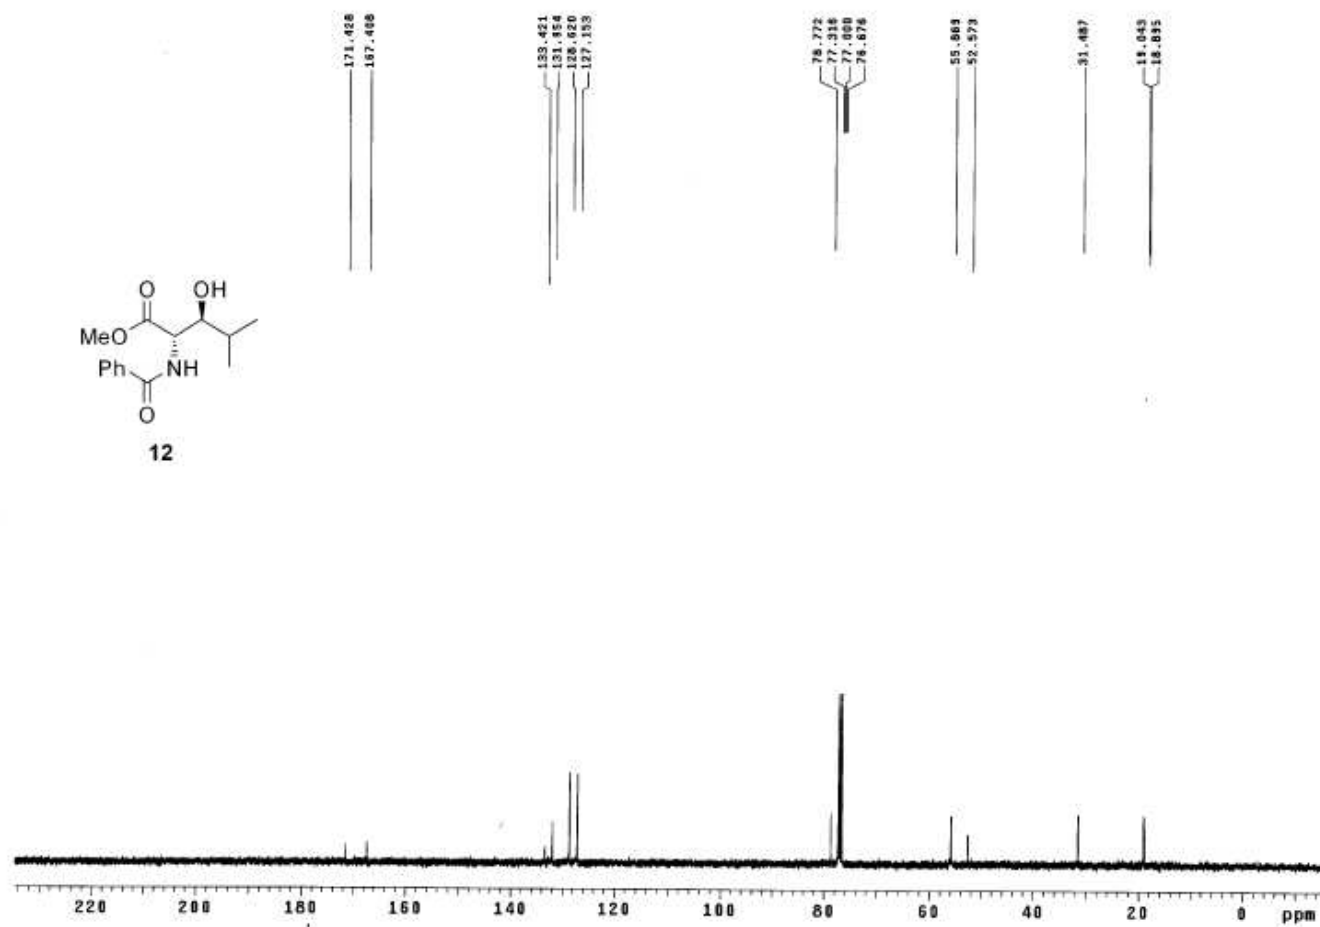

$^1\text{H}$  NMR spectrum of compound **13** (400 MHz,  $\text{CDCl}_3$ )

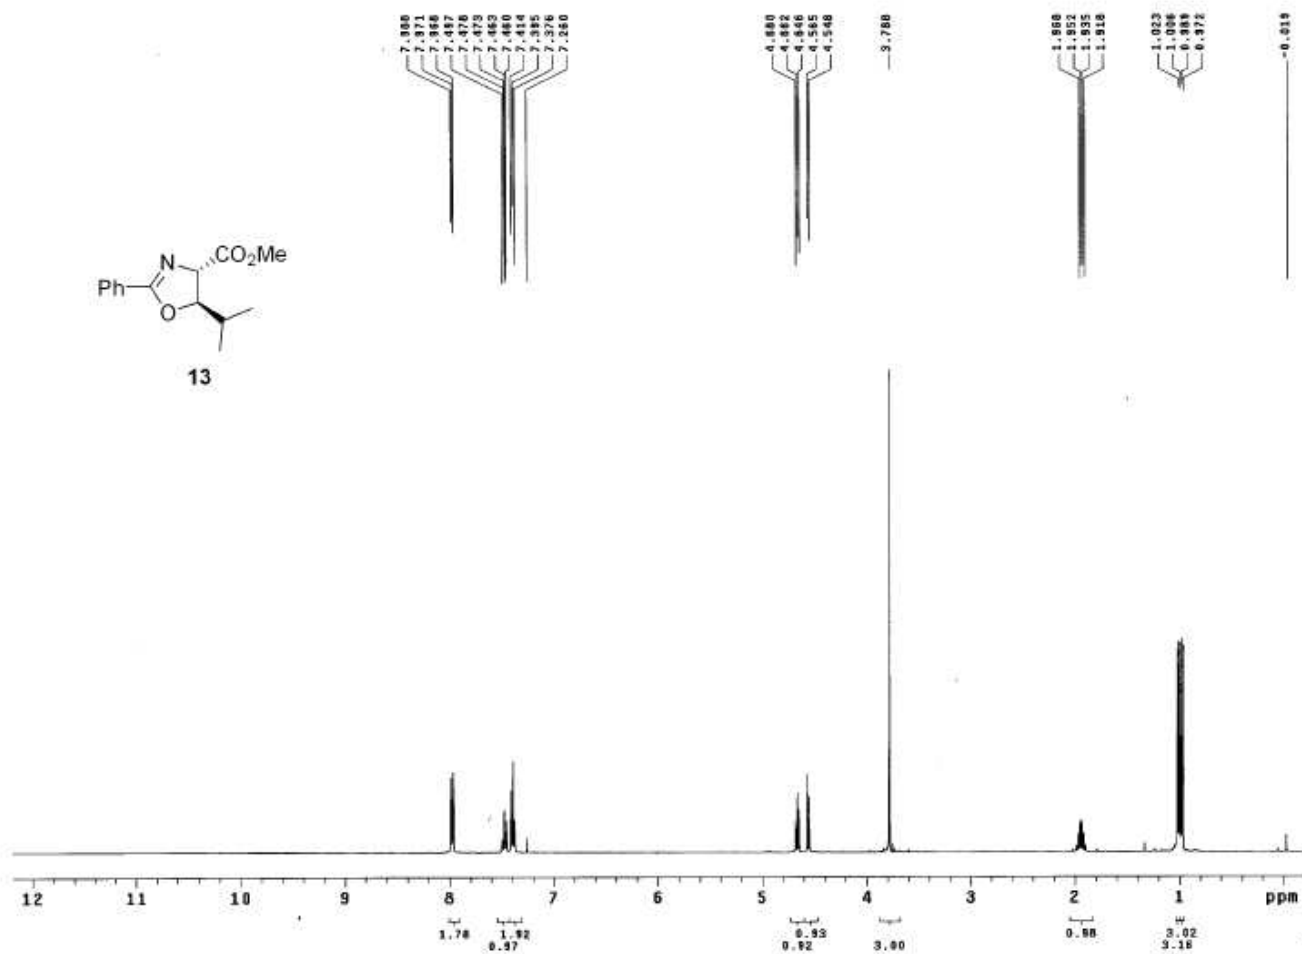

$^{13}\text{C}$  NMR spectrum of compound **13** (100 MHz,  $\text{CDCl}_3$ )

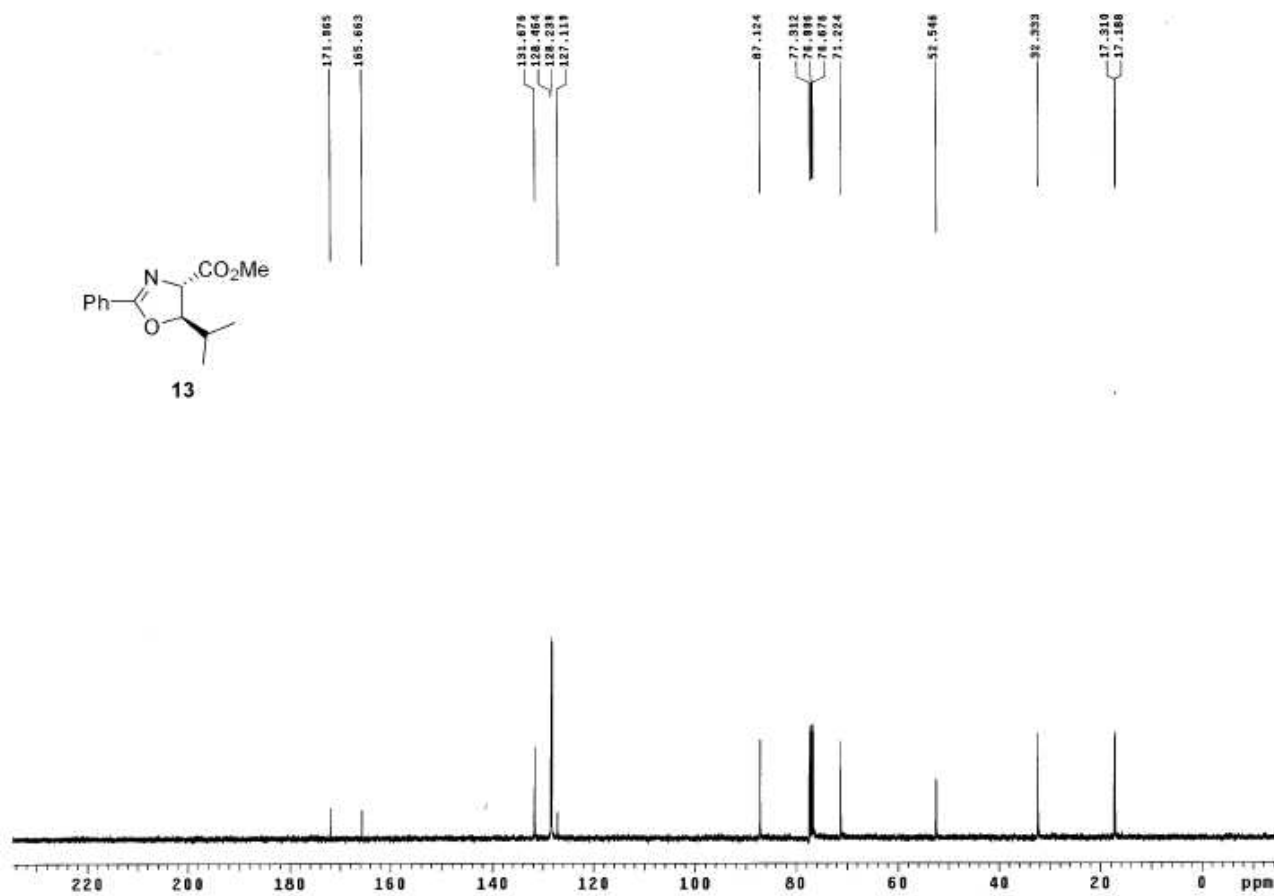



**11**

<sup>1</sup>H NMR spectrum (CDCl<sub>3</sub>) of compound **11**. The spectrum displays peaks corresponding to the structure, with integration values indicated below the baseline.

| Chemical Shift (ppm)                                                                                                                                                                                                                                                                                                                                                                                                                                                                                                                                                                                                                                                                                                                                                                                                                                                                                                                                                                                                                                                                                                                                                                                                                                                                                                                                                                                                                                                                                                                                                                                                                                                                                                                                                                                                                                                                                                                                                                                                                                                                                                                                                                                                                                                                                                                                                                                                                                                                                                                                                                                                                                                                                                                                                                                                                                                                                                                                                                                                                                                                                                                                                                                                                                                                                                                                                                                                                                                                                                                                                                                                                                                                                                                                                 | Integration |
|----------------------------------------------------------------------------------------------------------------------------------------------------------------------------------------------------------------------------------------------------------------------------------------------------------------------------------------------------------------------------------------------------------------------------------------------------------------------------------------------------------------------------------------------------------------------------------------------------------------------------------------------------------------------------------------------------------------------------------------------------------------------------------------------------------------------------------------------------------------------------------------------------------------------------------------------------------------------------------------------------------------------------------------------------------------------------------------------------------------------------------------------------------------------------------------------------------------------------------------------------------------------------------------------------------------------------------------------------------------------------------------------------------------------------------------------------------------------------------------------------------------------------------------------------------------------------------------------------------------------------------------------------------------------------------------------------------------------------------------------------------------------------------------------------------------------------------------------------------------------------------------------------------------------------------------------------------------------------------------------------------------------------------------------------------------------------------------------------------------------------------------------------------------------------------------------------------------------------------------------------------------------------------------------------------------------------------------------------------------------------------------------------------------------------------------------------------------------------------------------------------------------------------------------------------------------------------------------------------------------------------------------------------------------------------------------------------------------------------------------------------------------------------------------------------------------------------------------------------------------------------------------------------------------------------------------------------------------------------------------------------------------------------------------------------------------------------------------------------------------------------------------------------------------------------------------------------------------------------------------------------------------------------------------------------------------------------------------------------------------------------------------------------------------------------------------------------------------------------------------------------------------------------------------------------------------------------------------------------------------------------------------------------------------------------------------------------------------------------------------------------------------|-------------|
| 7.599, 7.597, 7.595, 7.593, 7.591, 7.589, 7.485, 7.480, 7.478, 7.476, 7.474, 7.472, 7.470, 7.468, 7.466, 7.464, 7.462, 7.460, 7.458, 7.456, 7.454                                                                                                                                                                                                                                                                                                                                                                                                                                                                                                                                                                                                                                                                                                                                                                                                                                                                                                                                                                                                                                                                                                                                                                                                                                                                                                                                                                                                                                                                                                                                                                                                                                                                                                                                                                                                                                                                                                                                                                                                                                                                                                                                                                                                                                                                                                                                                                                                                                                                                                                                                                                                                                                                                                                                                                                                                                                                                                                                                                                                                                                                                                                                                                                                                                                                                                                                                                                                                                                                                                                                                                                                                    | 1.89, 2.03  |
| 4.908, 4.935, 4.971, 4.998, 5.034, 5.061, 5.088, 5.113                                                                                                                                                                                                                                                                                                                                                                                                                                                                                                                                                                                                                                                                                                                                                                                                                                                                                                                                                                                                                                                                                                                                                                                                                                                                                                                                                                                                                                                                                                                                                                                                                                                                                                                                                                                                                                                                                                                                                                                                                                                                                                                                                                                                                                                                                                                                                                                                                                                                                                                                                                                                                                                                                                                                                                                                                                                                                                                                                                                                                                                                                                                                                                                                                                                                                                                                                                                                                                                                                                                                                                                                                                                                                                               | 9.95, 1.02  |
| 3.776, 3.778                                                                                                                                                                                                                                                                                                                                                                                                                                                                                                                                                                                                                                                                                                                                                                                                                                                                                                                                                                                                                                                                                                                                                                                                                                                                                                                                                                                                                                                                                                                                                                                                                                                                                                                                                                                                                                                                                                                                                                                                                                                                                                                                                                                                                                                                                                                                                                                                                                                                                                                                                                                                                                                                                                                                                                                                                                                                                                                                                                                                                                                                                                                                                                                                                                                                                                                                                                                                                                                                                                                                                                                                                                                                                                                                                         | 3.00        |
| 2.818, 2.821, 2.824, 2.827, 2.830, 2.833, 2.836, 2.839, 2.842, 2.845, 2.848, 2.851, 2.854, 2.857, 2.860, 2.863, 2.866, 2.869, 2.872, 2.875, 2.878, 2.881, 2.884, 2.887, 2.890, 2.893, 2.896, 2.899, 2.902, 2.905, 2.908, 2.911, 2.914, 2.917, 2.920, 2.923, 2.926, 2.929, 2.932, 2.935, 2.938, 2.941, 2.944, 2.947, 2.950, 2.953, 2.956, 2.959, 2.962, 2.965, 2.968, 2.971, 2.974, 2.977, 2.980, 2.983, 2.986, 2.989, 2.992, 2.995, 2.998, 3.001, 3.004, 3.007, 3.010, 3.013, 3.016, 3.019, 3.022, 3.025, 3.028, 3.031, 3.034, 3.037, 3.040, 3.043, 3.046, 3.049, 3.052, 3.055, 3.058, 3.061, 3.064, 3.067, 3.070, 3.073, 3.076, 3.079, 3.082, 3.085, 3.088, 3.091, 3.094, 3.097, 3.100, 3.103, 3.106, 3.109, 3.112, 3.115, 3.118, 3.121, 3.124, 3.127, 3.130, 3.133, 3.136, 3.139, 3.142, 3.145, 3.148, 3.151, 3.154, 3.157, 3.160, 3.163, 3.166, 3.169, 3.172, 3.175, 3.178, 3.181, 3.184, 3.187, 3.190, 3.193, 3.196, 3.199, 3.202, 3.205, 3.208, 3.211, 3.214, 3.217, 3.220, 3.223, 3.226, 3.229, 3.232, 3.235, 3.238, 3.241, 3.244, 3.247, 3.250, 3.253, 3.256, 3.259, 3.262, 3.265, 3.268, 3.271, 3.274, 3.277, 3.280, 3.283, 3.286, 3.289, 3.292, 3.295, 3.298, 3.301, 3.304, 3.307, 3.310, 3.313, 3.316, 3.319, 3.322, 3.325, 3.328, 3.331, 3.334, 3.337, 3.340, 3.343, 3.346, 3.349, 3.352, 3.355, 3.358, 3.361, 3.364, 3.367, 3.370, 3.373, 3.376, 3.379, 3.382, 3.385, 3.388, 3.391, 3.394, 3.397, 3.400, 3.403, 3.406, 3.409, 3.412, 3.415, 3.418, 3.421, 3.424, 3.427, 3.430, 3.433, 3.436, 3.439, 3.442, 3.445, 3.448, 3.451, 3.454, 3.457, 3.460, 3.463, 3.466, 3.469, 3.472, 3.475, 3.478, 3.481, 3.484, 3.487, 3.490, 3.493, 3.496, 3.499, 3.502, 3.505, 3.508, 3.511, 3.514, 3.517, 3.520, 3.523, 3.526, 3.529, 3.532, 3.535, 3.538, 3.541, 3.544, 3.547, 3.550, 3.553, 3.556, 3.559, 3.562, 3.565, 3.568, 3.571, 3.574, 3.577, 3.580, 3.583, 3.586, 3.589, 3.592, 3.595, 3.598, 3.601, 3.604, 3.607, 3.610, 3.613, 3.616, 3.619, 3.622, 3.625, 3.628, 3.631, 3.634, 3.637, 3.640, 3.643, 3.646, 3.649, 3.652, 3.655, 3.658, 3.661, 3.664, 3.667, 3.670, 3.673, 3.676, 3.679, 3.682, 3.685, 3.688, 3.691, 3.694, 3.697, 3.700, 3.703, 3.706, 3.709, 3.712, 3.715, 3.718, 3.721, 3.724, 3.727, 3.730, 3.733, 3.736, 3.739, 3.742, 3.745, 3.748, 3.751, 3.754, 3.757, 3.760, 3.763, 3.766, 3.769, 3.772, 3.775, 3.778, 3.781, 3.784, 3.787, 3.790, 3.793, 3.796, 3.799, 3.802, 3.805, 3.808, 3.811, 3.814, 3.817, 3.820, 3.823, 3.826, 3.829, 3.832, 3.835, 3.838, 3.841, 3.844, 3.847, 3.850, 3.853, 3.856, 3.859, 3.862, 3.865, 3.868, 3.871, 3.874, 3.877, 3.880, 3.883, 3.886, 3.889, 3.892, 3.895, 3.898, 3.901, 3.904, 3.907, 3.910, 3.913, 3.916, 3.919, 3.922, 3.925, 3.928, 3.931, 3.934, 3.937, 3.940, 3.943, 3.946, 3.949, 3.952, 3.955, 3.958, 3.961, 3.964, 3.967, 3.970, 3.973, 3.976, 3.979, 3.982, 3.985, 3.988, 3.991, 3.994, 3.997, 4.000, 4.003, 4.006, 4.009, 4.012, 4.015, 4.018, 4.021, 4.024, 4.027, 4.030, 4.033, 4.036, 4.039, 4.042, 4.045, 4.048, 4.051, 4.054, 4.057, 4.060, 4.063, 4.066, 4.069, 4.072, 4.075, 4.078, 4.081, 4.084, 4.087, 4.090, 4.093, 4.096, 4.099, 4.102, 4.105, 4.108, 4.111, 4.114, 4.117, 4.120, 4.123, 4.126, 4.129, 4.132, 4.135, 4.138, 4.141, 4.144, 4.147, 4.150, 4.153, 4.156, 4.159, 4.162, 4.165, 4.168, 4.171, 4.174, 4.177, 4.180, 4.183, 4.186, 4.189, 4.192, 4.195, 4.198, 4.201, 4.204, 4.207, 4.210, 4.213, 4.216, 4.219, 4.222, 4.225, 4.228, 4.231, 4.234, 4.237, 4.240, 4.243, 4.246, 4.249, 4.252, 4.255, 4.258, 4.261, 4.264, 4.267, 4.270, 4.273, 4.276, 4.279, 4.282, 4.285, 4.288, 4.291, 4.294, 4.297, 4.300, 4.303, 4.306, 4.309, 4.312, 4.315, 4.318, 4.321, 4.324, 4.327, 4.330, 4.333, 4.336, 4.339, 4.342, 4.345, 4.348, 4.351, 4.354, 4.357, 4.360, 4.363, 4.366, 4 |             |

$^{13}\text{C}$  NMR spectrum of compound **11** (75 MHz,  $\text{CDCl}_3$ )

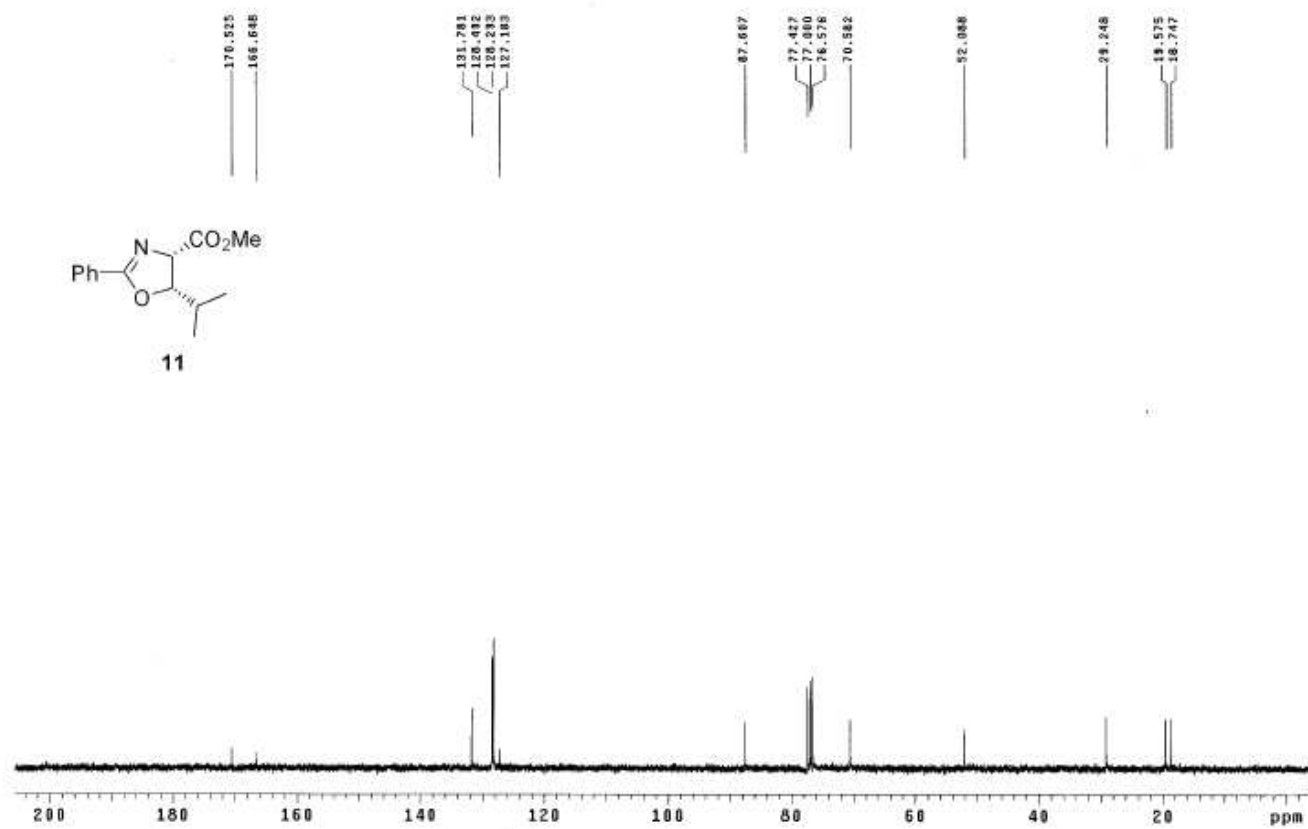

# HPLC spectrum of the compound IVa

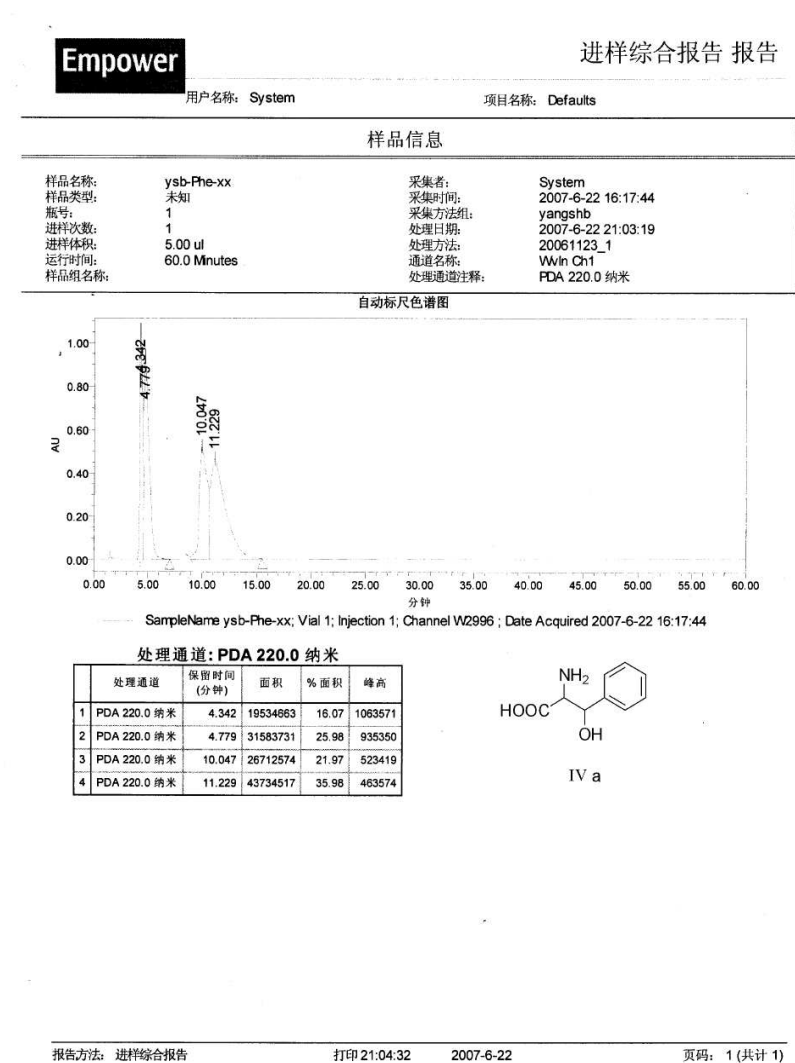

HPLC spectrum of the compound **5f**

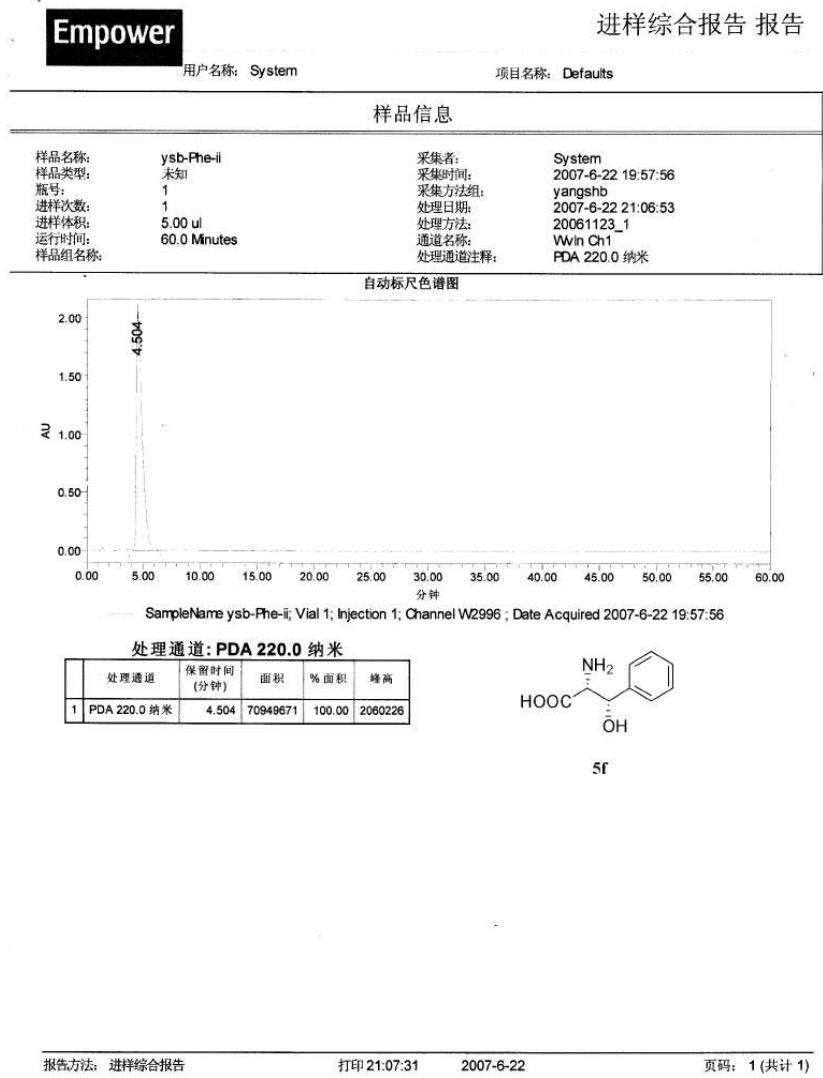

自动标尺色谱图



SampleName ysb-Phe-ii; Vial 1; Injection 1; Channel W2996 ; Date Acquired 2007-6-22 19:57:56

处理通道: PDA 220.0 纳米

|   | 处理通道         | 保留时间<br>(分钟) | 面积       | % 面积   | 峰高      |
|---|--------------|--------------|----------|--------|---------|
| 1 | PDA 220.0 纳米 | 4.504        | 70949671 | 100.00 | 2060226 |

N[C@@H](Cc1ccccc1)[C@H](O)C(=O)O

5f

报告方法: 进样综合报告

打印 21:07:31      2007-6-22

页码: 1 (共计 1)

# HPLC spectrum of the compound 4e

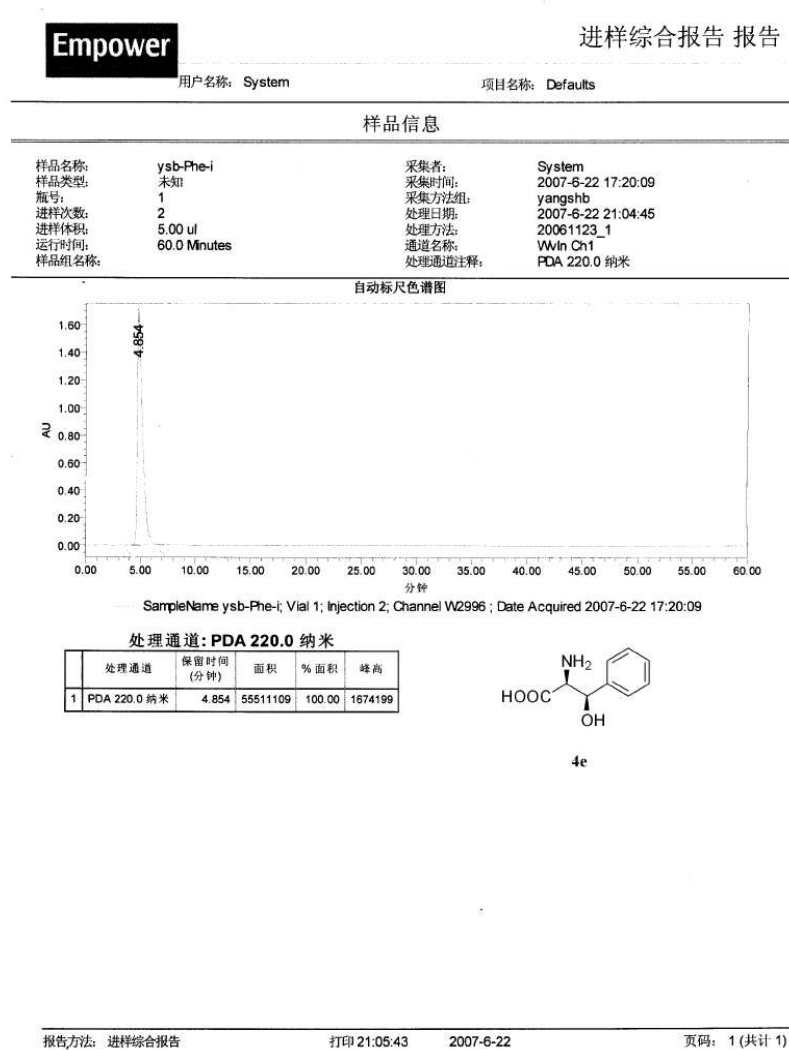

# HPLC spectrum of the compound **IVb**

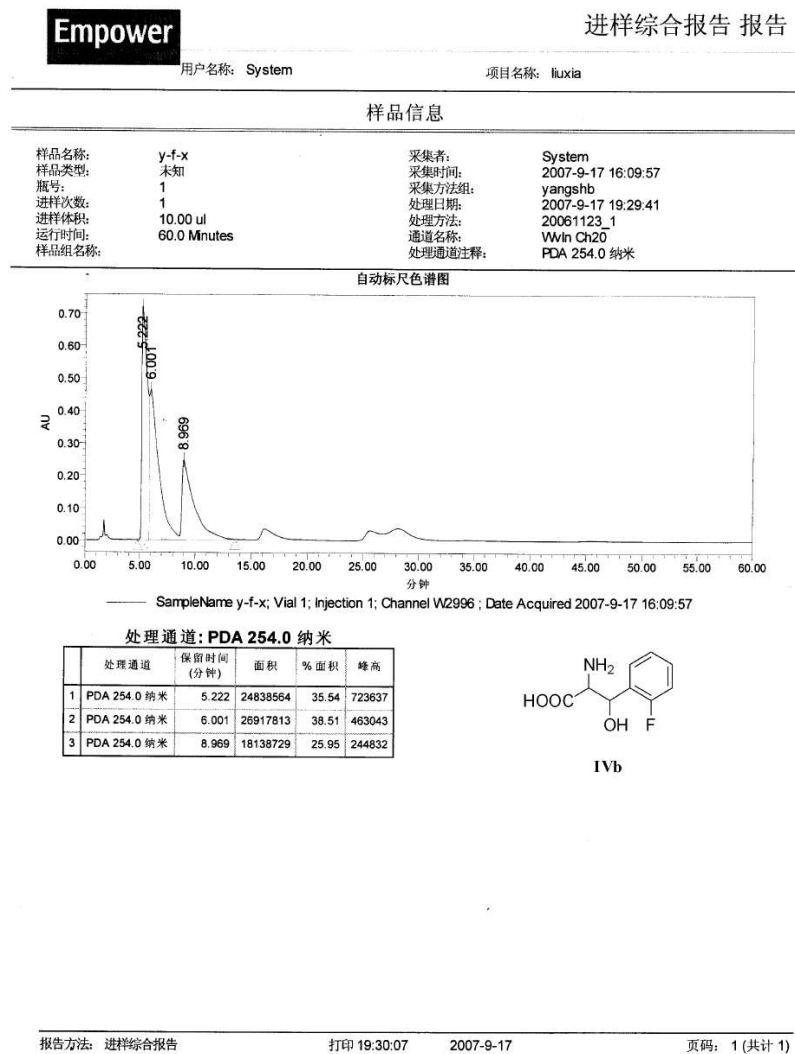
报告方法: 进样综合报告
打印 19:30:07
2007-9-17
页码: 1 (共计 1)

# HPLC spectrum of the compound 4f

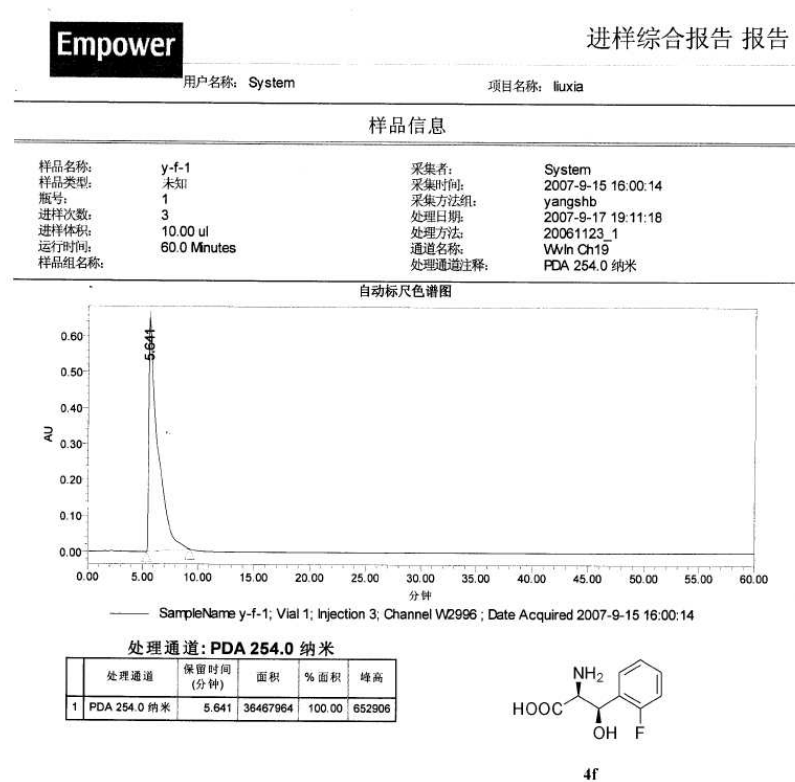

# HPLC spectrum of the compound 5g

Empower

进样综合报告 报告

用户名: System

项目名称: liuxia

## 样品信息

|        |              |         |                    |
|--------|--------------|---------|--------------------|
| 样品名称:  | y-f-2        | 采集者:    | System             |
| 样品类型:  | 未知           | 采集时间:   | 2007-9-17 19:19:43 |
| 瓶号:    | 1            | 采集方法组:  | yangshb            |
| 进样次数:  | 3            | 处理日期:   | 2007-9-17 20:25:26 |
| 进样体积:  | 10.00 ul     | 处理方法:   | 20061123_1         |
| 运行时间:  | 60.0 Minutes | 通道名称:   | Win Ch21           |
| 样品组名称: |              | 处理通道注释: | PDA 254.0 纳米       |

## 自动标尺色谱图

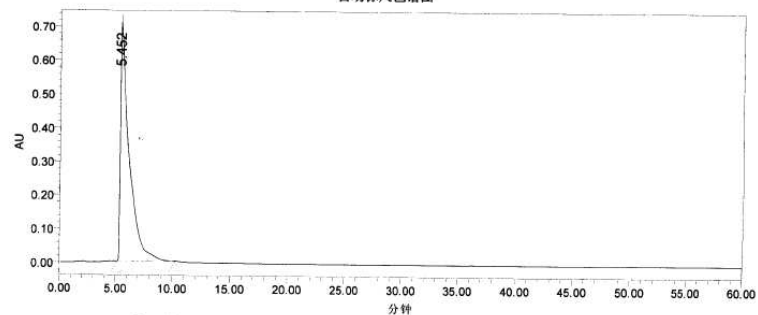

SampleName y-f-2; Vial 1; Injection 3; Channel W2996; Date Acquired 2007-9-17 19:19:43

## 处理通道: PDA 254.0 纳米

|   | 处理通道         | 保留时间<br>(分钟) | 面积       | % 面积   | 峰高     |
|---|--------------|--------------|----------|--------|--------|
| 1 | PDA 254.0 纳米 | 5.452        | 37763132 | 100.00 | 710510 |

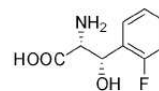

5g



# HPLC spectrum of the compound IVc

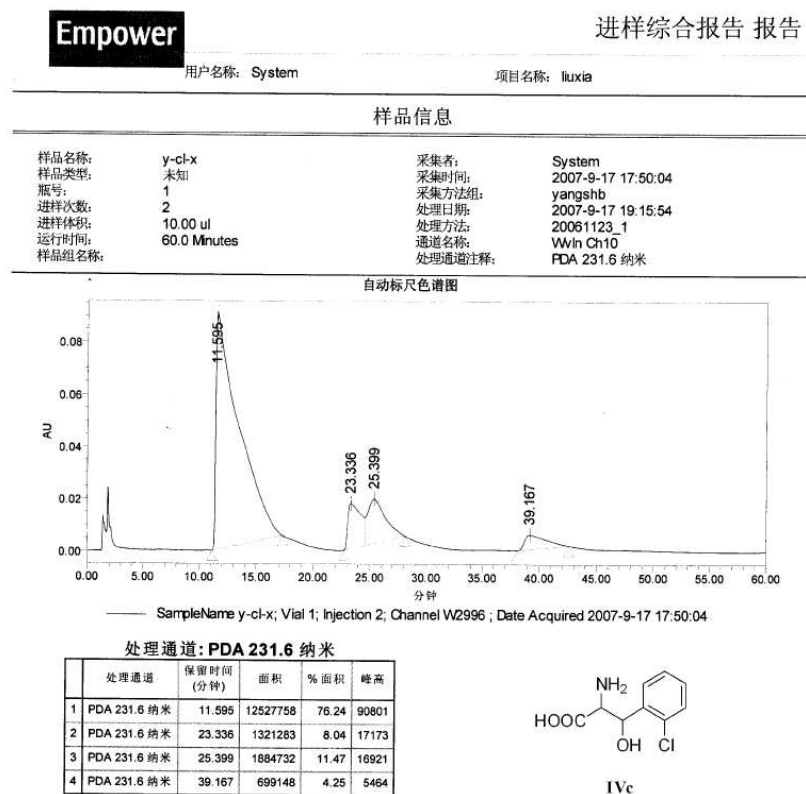

# HPLC spectrum of the compound 4g

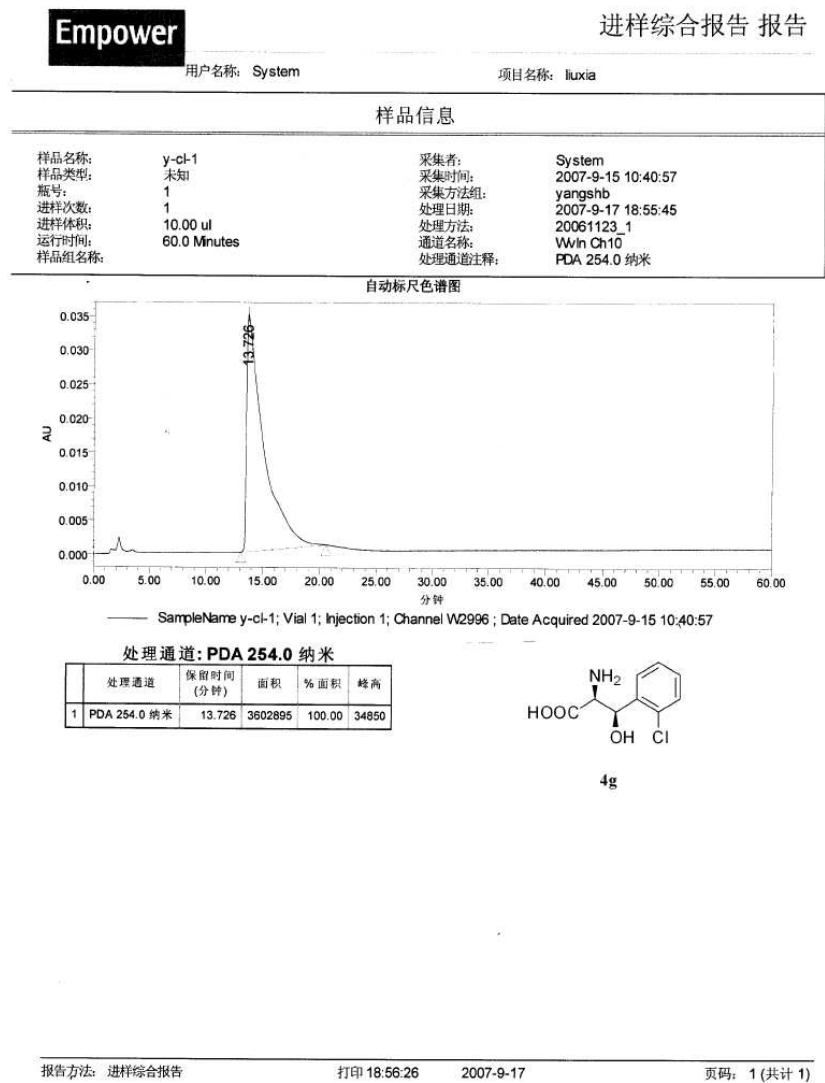

# HPLC spectrum of the compound 5h

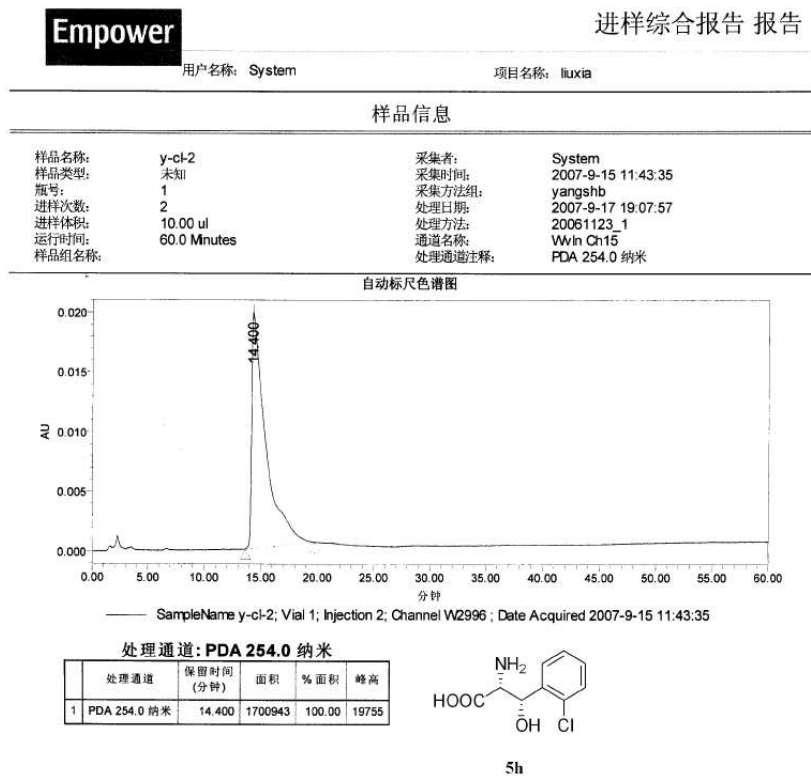

Supplement: Supplementary file 1 [file 4574851]
